# Supplementary material for: Synthesis of vinyl sulfides and thioethers via a hydrothiolation reaction of 4-hydroxydithiocoumarins and arylacetylenes/styrenes
Source: Royal Society of Chemistry journal article supplement (doi:10.1039/d1ob01729b), 2021-01-01

## **Electronic Supporting Information**

### **Synthesis of vinyl sulfides and thioethers *via* hydrothiolation reaction of 4-hydroxydithiocoumarin and arylacetylenes/styrenes†**

Santa Mondal, Sabina Yashmin and Abu Taleb Khan\*

Department of Chemistry, Indian Institution of Technology, Guwahati, Guwahati – 781039, India

E-mail: atk@iitg.ac.in (A.T. Khan)

#### **Content**

##### **1. General Information and Methods**

##### **2. Copies of <sup>1</sup>H NMR, <sup>13</sup>C NMR and HRMS spectra of all Compounds**

##### **1. General Information and Methods**

<sup>1</sup>H and <sup>13</sup>C NMR spectra were recorded on 400 MHz and 500 MHz NMR spectrometer, TMS as internal reference; chemical shifts ( $\delta$  scale) are reported in parts per million (ppm). <sup>1</sup>H NMR Spectra are reported in the order: multiplicity, coupling constant (*J*value) in Hertz (Hz) and no. of protons; signals were characterized as *s* (singlet), *d* (doublet), *t* (triplet), *q* (quartet) and *m* (multiplet). IR spectra were recorded in KBr pellet. HRMS spectra were recorded using ESI and APCI (TOF) mode.

## 2. Copies of $^1\text{H}$ NMR, $^{13}\text{C}$ NMR and HRMS spectra of all Compounds

### $^1\text{H}$ NMR of optimization Table 1, entry 2

SM-42I2-1-1H.1.fid  
SM-42I2-1-1H

8.48  
8.47  
8.46  
8.42  
8.42  
8.41  
8.41  
8.40  
8.40  
8.39  
8.39  
7.26  
7.25  
7.21  
7.04  
7.03  
7.00  
6.11  
5.98

Reaction at 70 C, 1:1 mixture of compound 3a and inseparable mixture

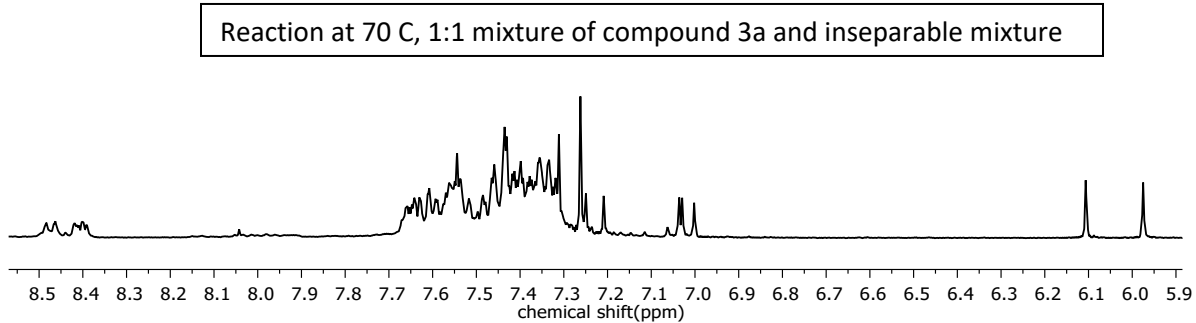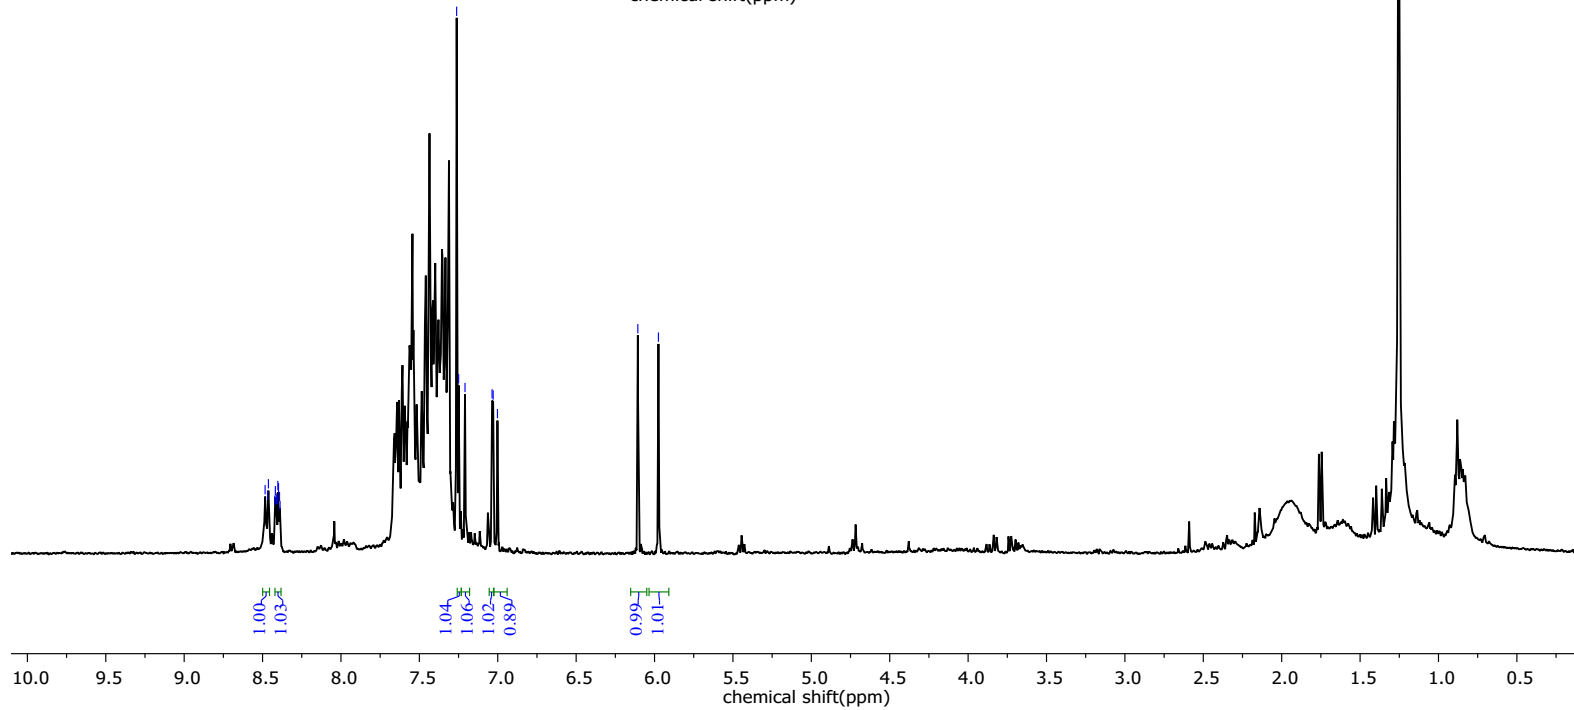

# <sup>1</sup>H NMR of compound3a

SM-42-20-1H.1.fid  
SM-42-20-1H

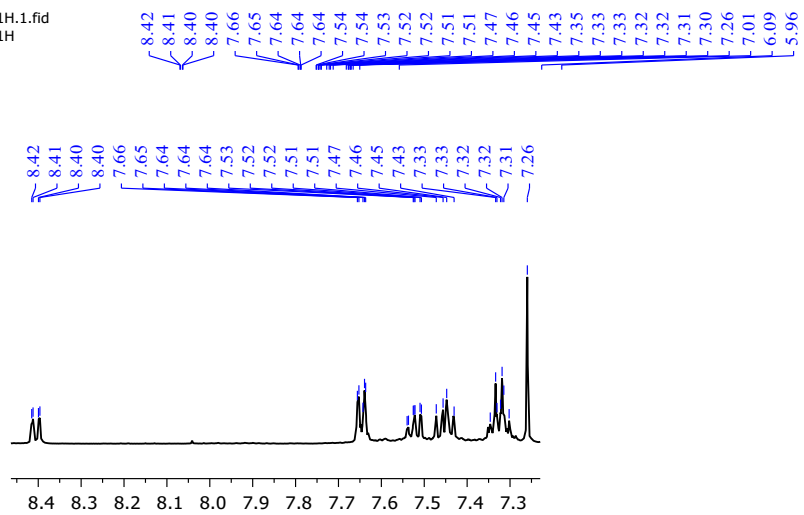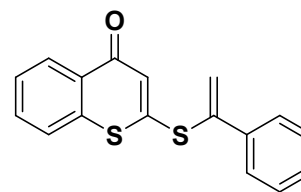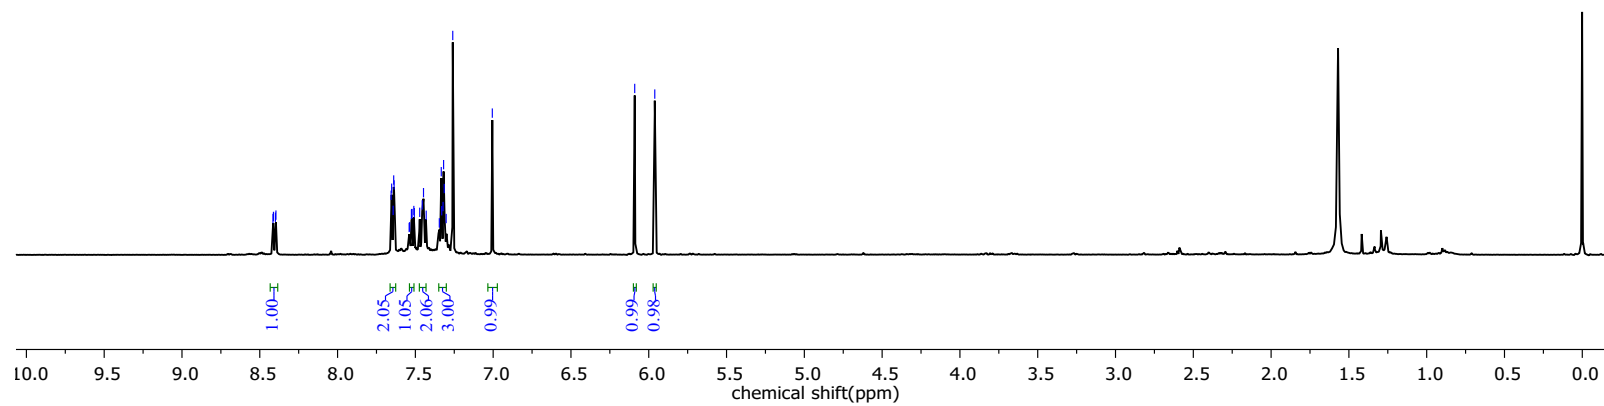

<sup>13</sup>C NMR of compound 3a

SM-42-20-13C.1.fid  
SM-42-20-13C

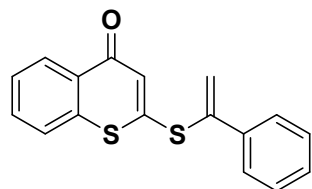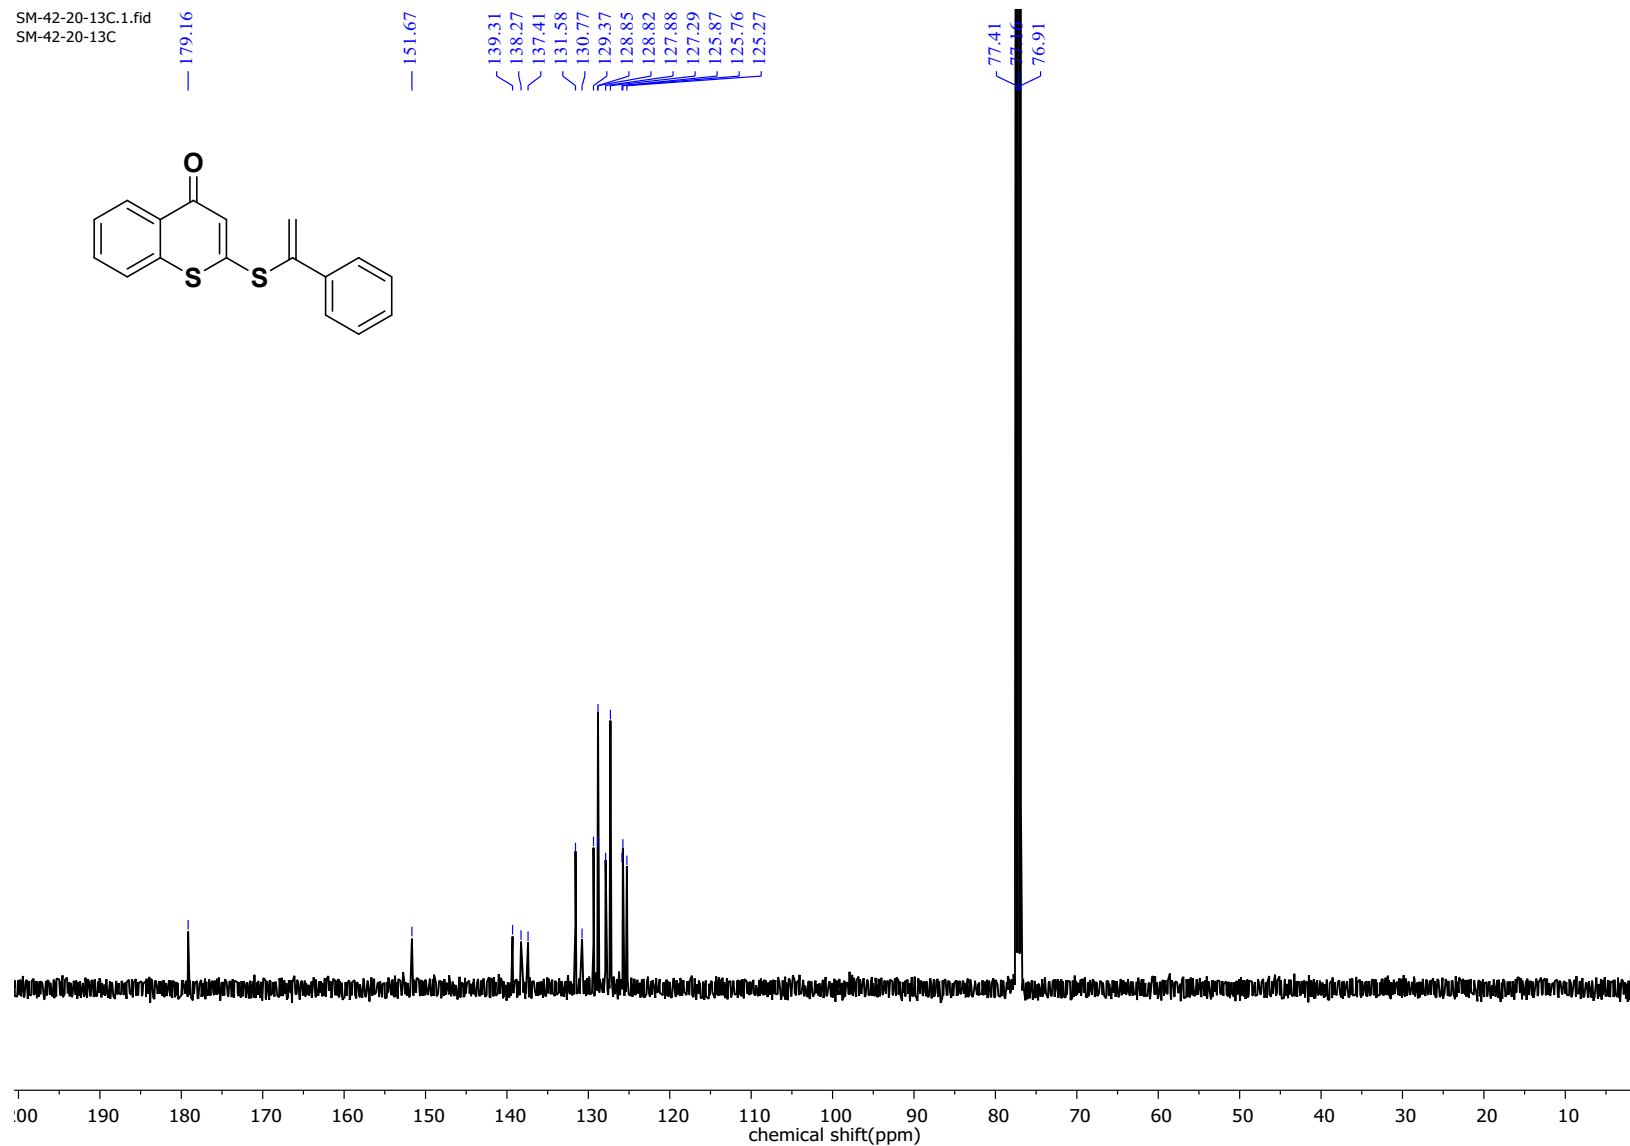

# HRMS of compound 3a

|               |                |             |                    |                 |              |                        |                      |
|---------------|----------------|-------------|--------------------|-----------------|--------------|------------------------|----------------------|
| Sample Name   | ATK-SM-42-20   | Position    | P1-B2              | Instrument Name | Instrument 1 | User Name              |                      |
| Inj Vol       | 20             | InjPosition |                    | SampleType      | Sample       | IRM Calibration Status | Success              |
| Data Filename | ATK-SM-42-20.d | ACQ Method  | ESI ALS 100-1000.m | Comment         |              | Acquired Time          | 2/3/2021 12:32:04 PM |

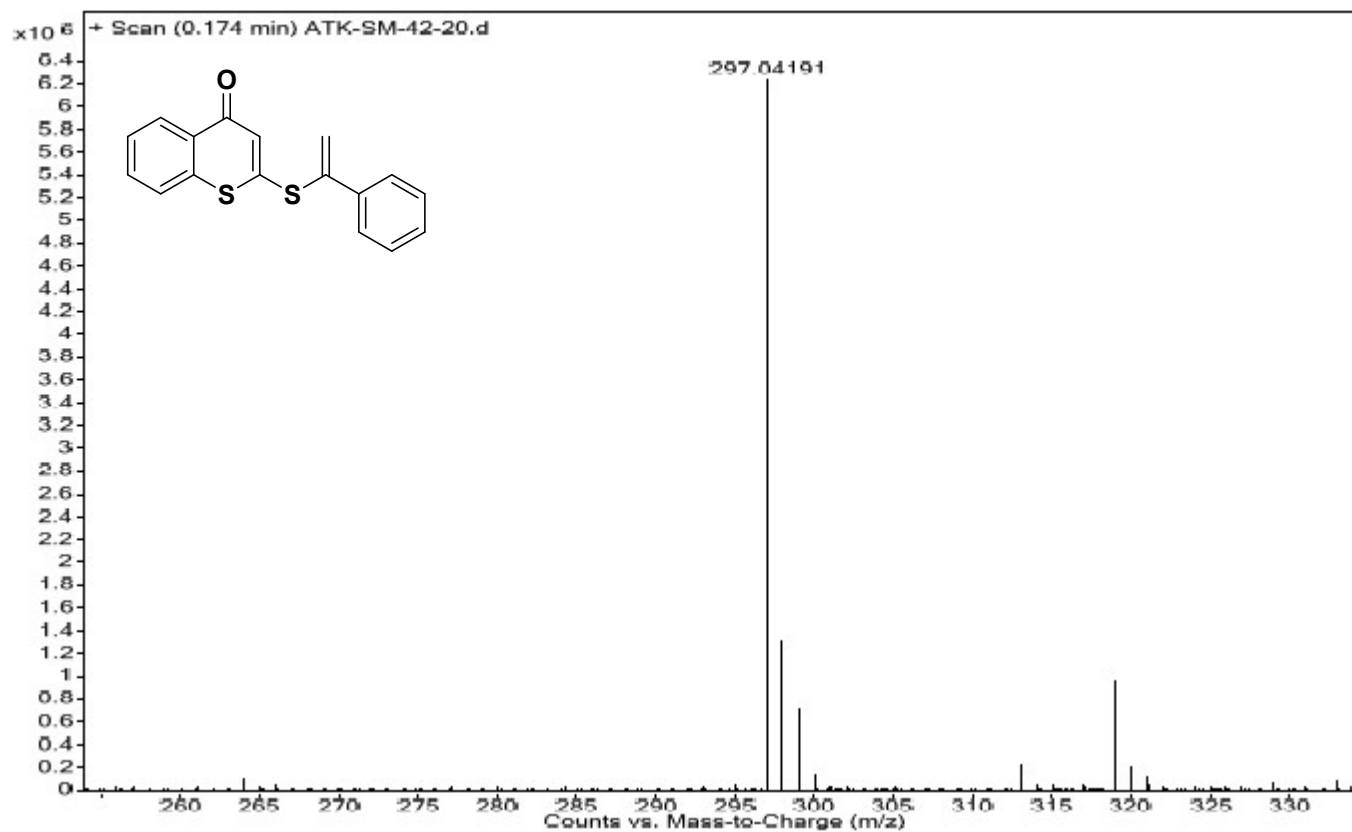

# <sup>1</sup>H NMR of compound 3b

SM-42A-20-1H.4.fid  
SM-42A-20-1H

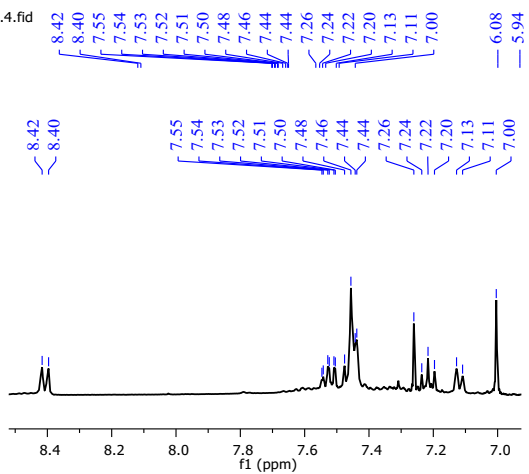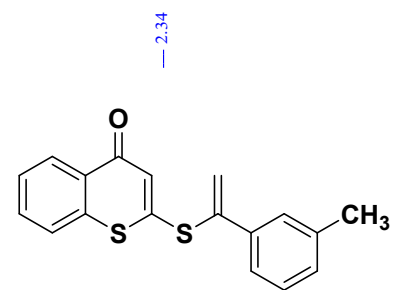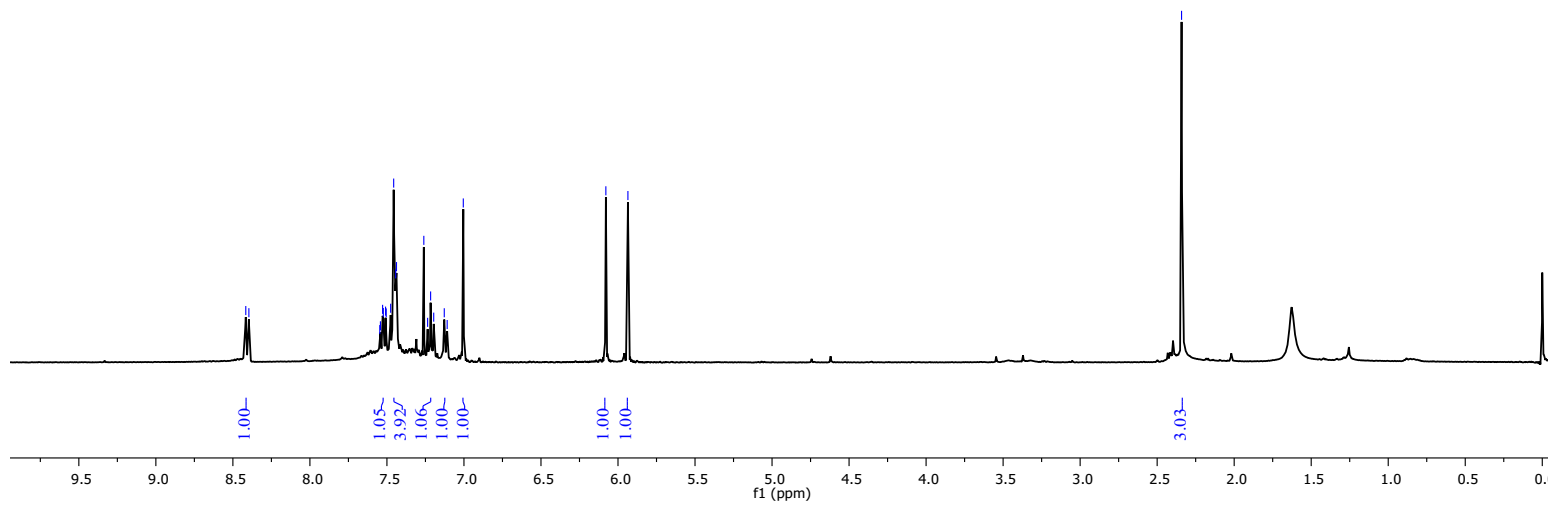

<sup>13</sup>C NMR of compound 3b

SM-42A-20-13C.5.fid  
SM-42A-20-13C

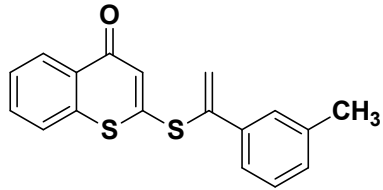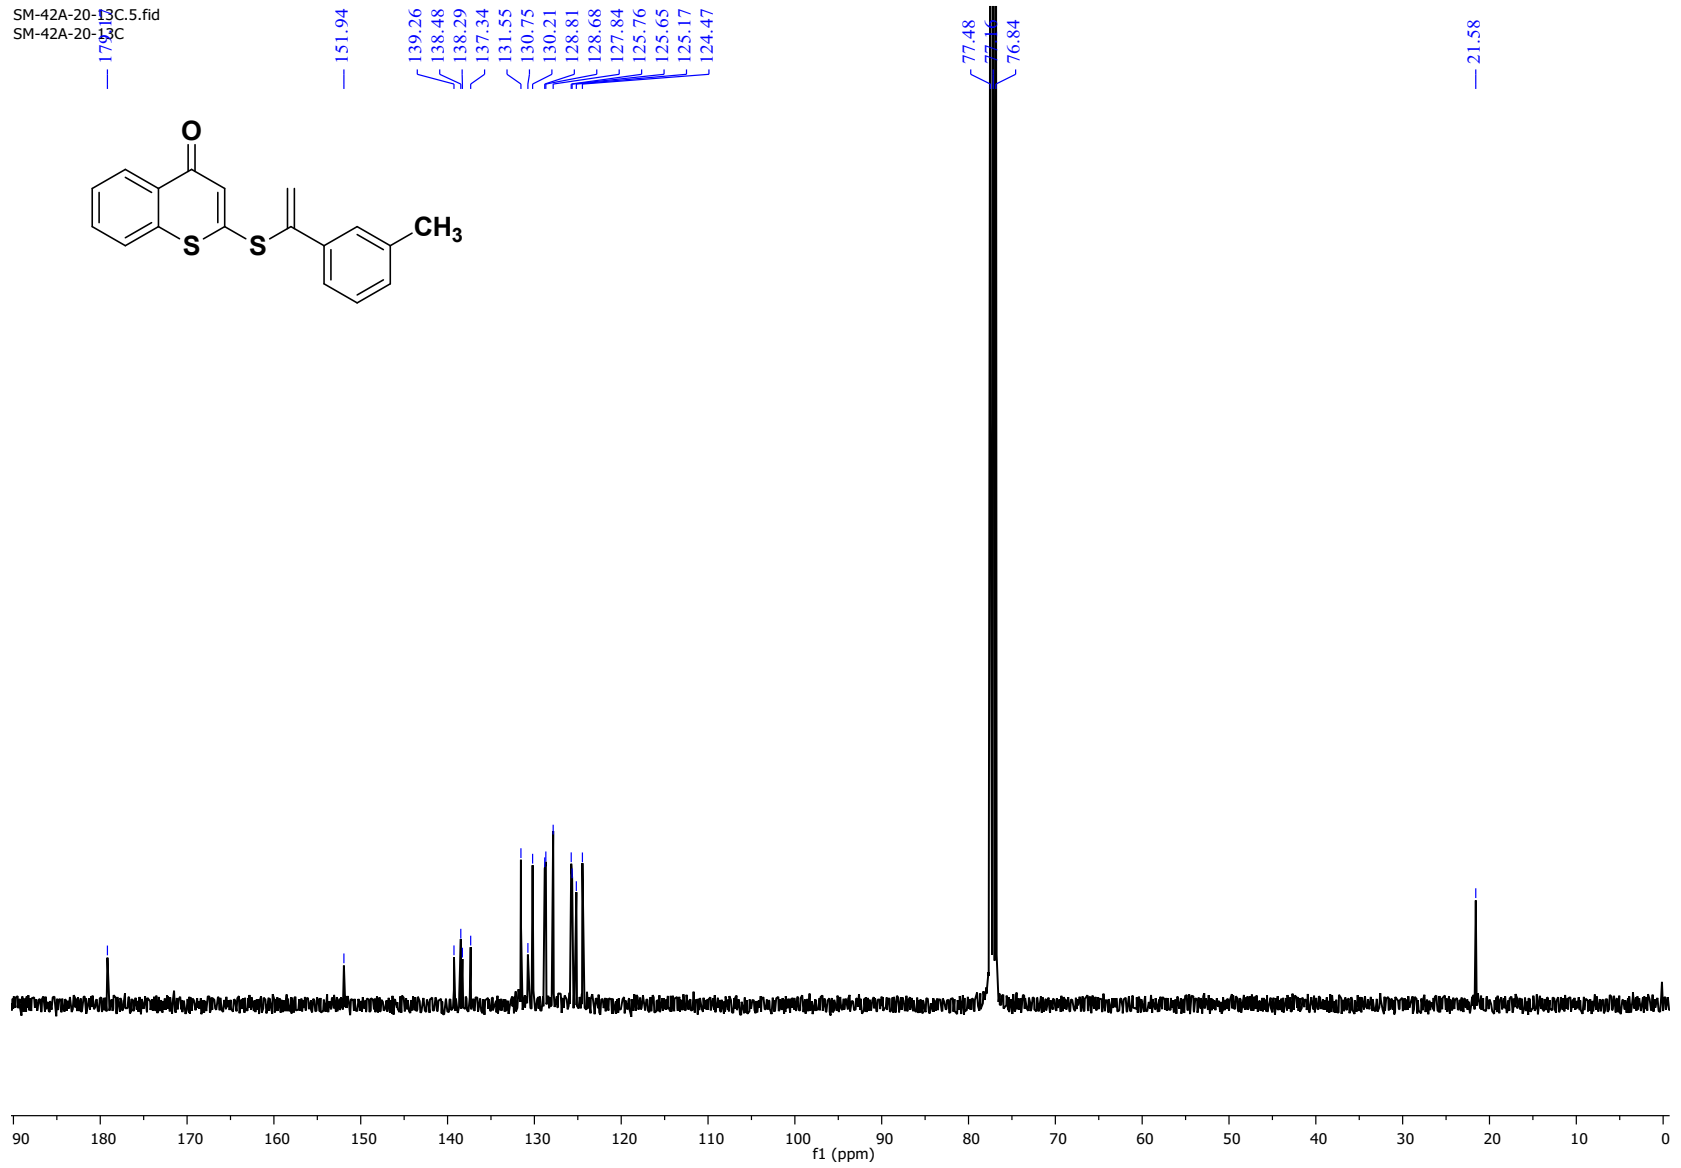

# HRMS of compound 3b

|             |                    |                        |         |                 |                                 |
|-------------|--------------------|------------------------|---------|-----------------|---------------------------------|
| Sample Name | SP-3AB             | Position               | P1-A2   | Instrument Name | Instrument 1                    |
| User Name   |                    | Inj Vol                | 20      | InjPosition     |                                 |
| Sample Type | Sample             | IRM Calibration Status | Success | Data Filename   | SP-3AB.d                        |
| ACQ Method  | ESI ALS 100-1000,m | Comment                |         | Acquired Time   | 11-09-2021 09:51:52 (UTC+05:30) |

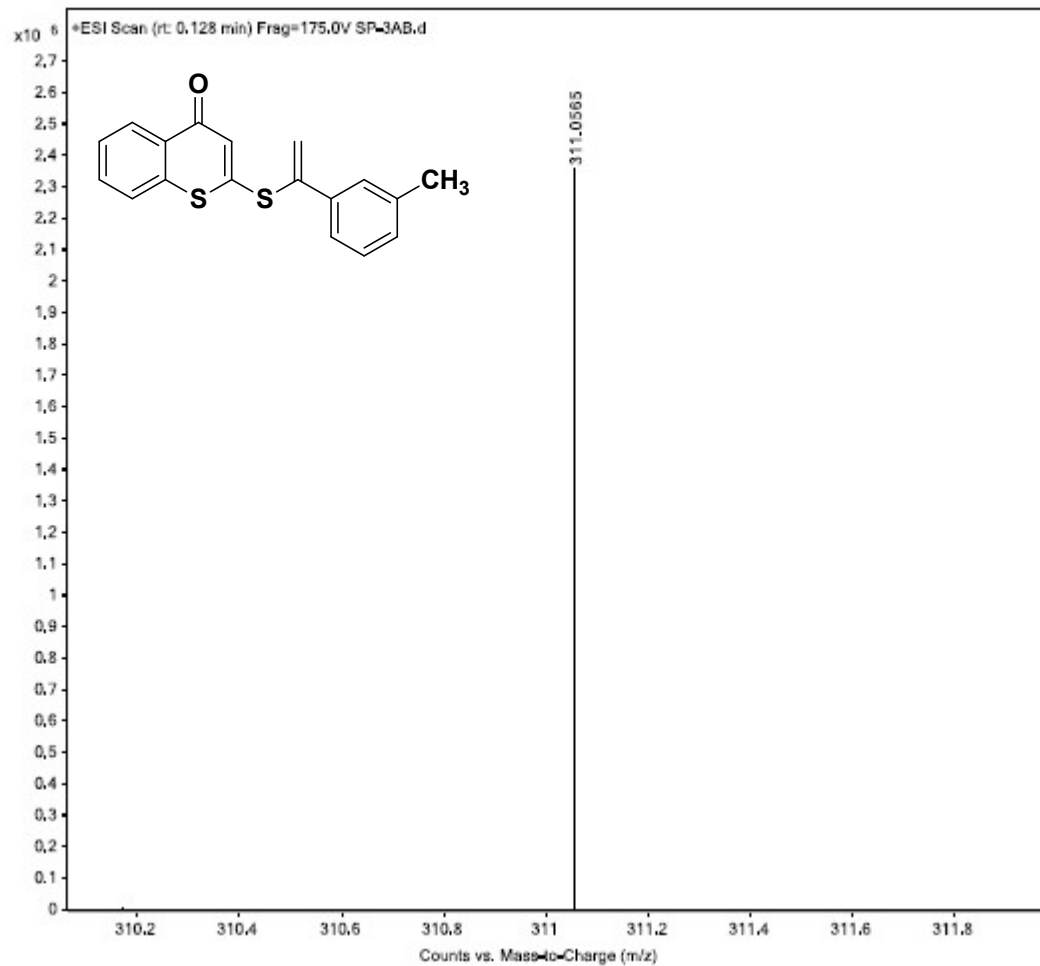



# <sup>1</sup>H NMR of compound 3c

ATK-SM-42G-20-1H  
ATK-SM-42G-20-1H

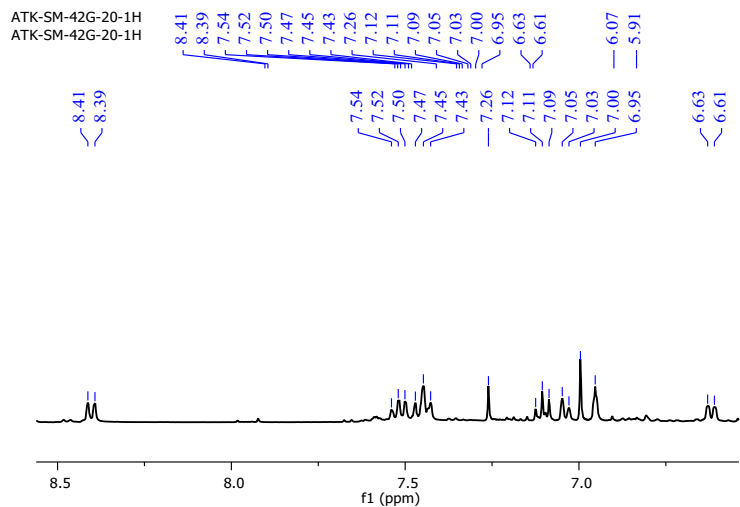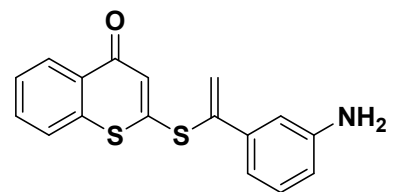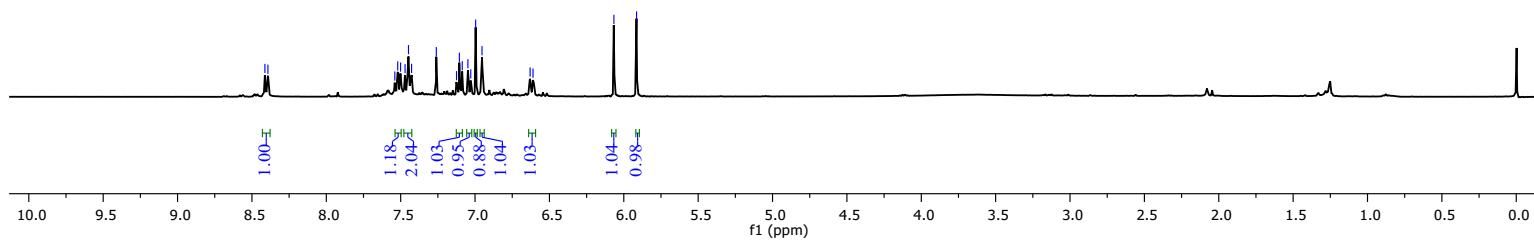

# <sup>13</sup>C NMR of compound 3c

ATK-SM-42G-20-13C  
ATK-SM-42G-20-13C

179.16

152.25

146.71

139.04

138.42

138.25

131.52

130.66

129.70

128.74

127.82

125.74

125.28

117.67

116.13

113.68

77.48

77.16

76.84

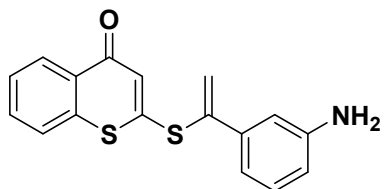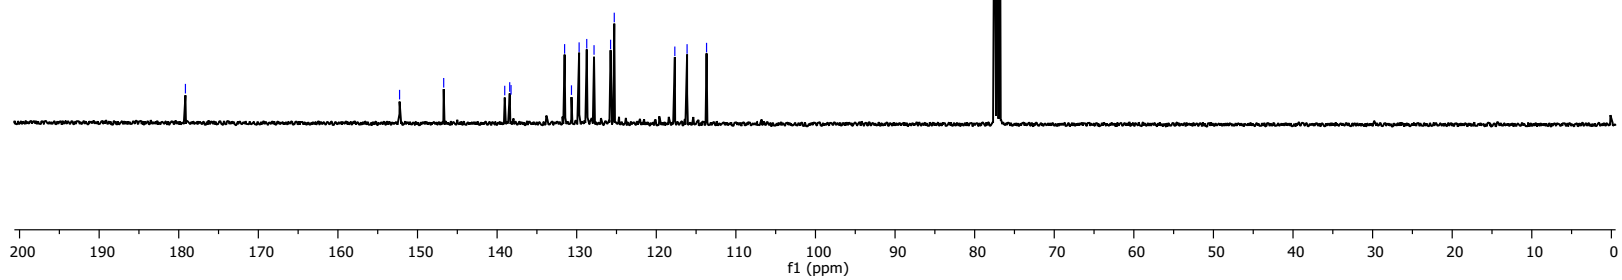

# HRMS of compound 3c

|                      |                 |                    |                    |                        |              |                               |                      |
|----------------------|-----------------|--------------------|--------------------|------------------------|--------------|-------------------------------|----------------------|
| <b>Sample Name</b>   | WASH            | <b>Position</b>    | P2-A9              | <b>Instrument Name</b> | Instrument 1 | <b>User Name</b>              |                      |
| <b>Inj Vol</b>       | 20              | <b>InjPosition</b> |                    | <b>SampleType</b>      | Sample       | <b>IRM Calibration Status</b> | Success              |
| <b>Data Filename</b> | ATK-SM-42G-20.d | <b>ACQ Method</b>  | ESI ALS 100-1000.m | <b>Comment</b>         |              | <b>Acquired Time</b>          | 1/22/2021 7:14:08 PM |

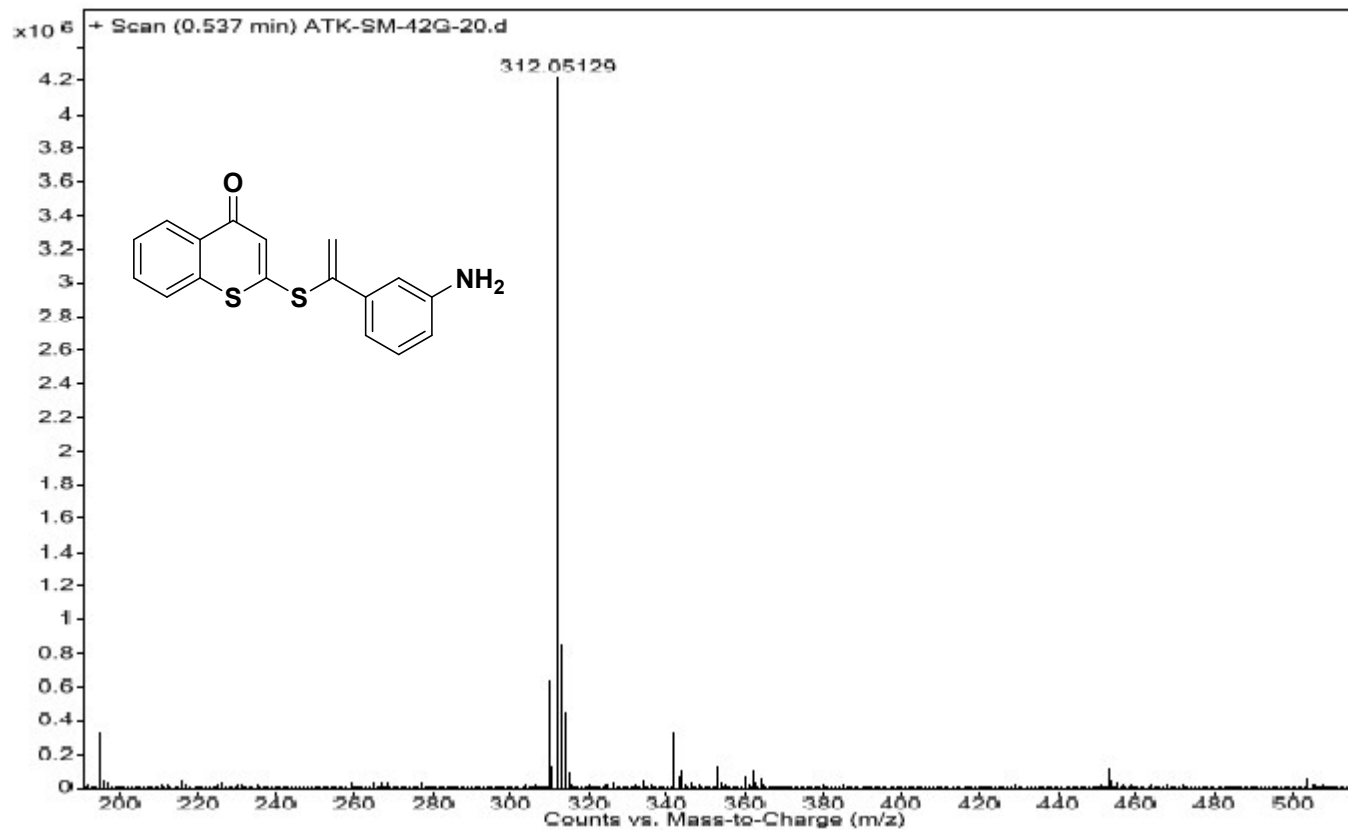

# <sup>1</sup>H NMR of compound 3d

SM-42E-20-1H.1.fid  
SM-42E-20-1H

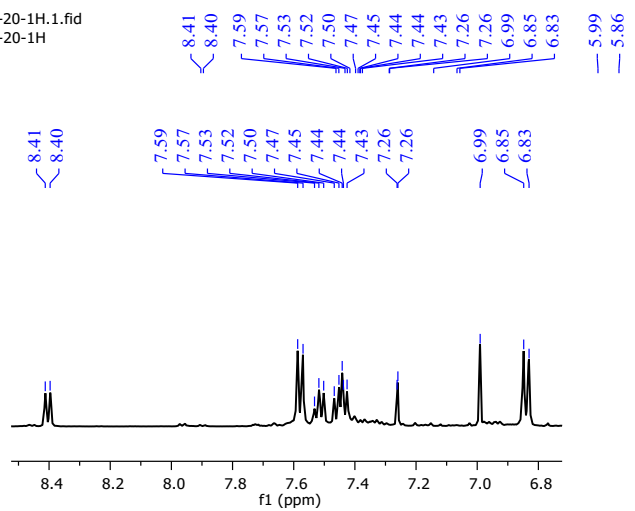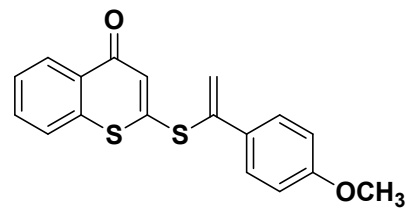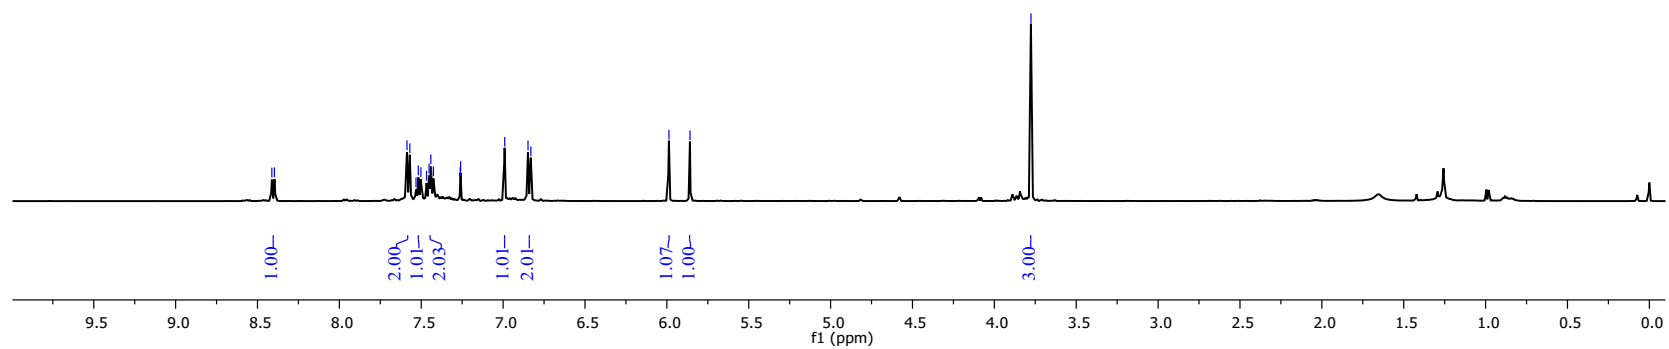

# <sup>13</sup>C NMR of compound 3d

SM-42E-20-13C.5.fid  
SM-42E-20-13C

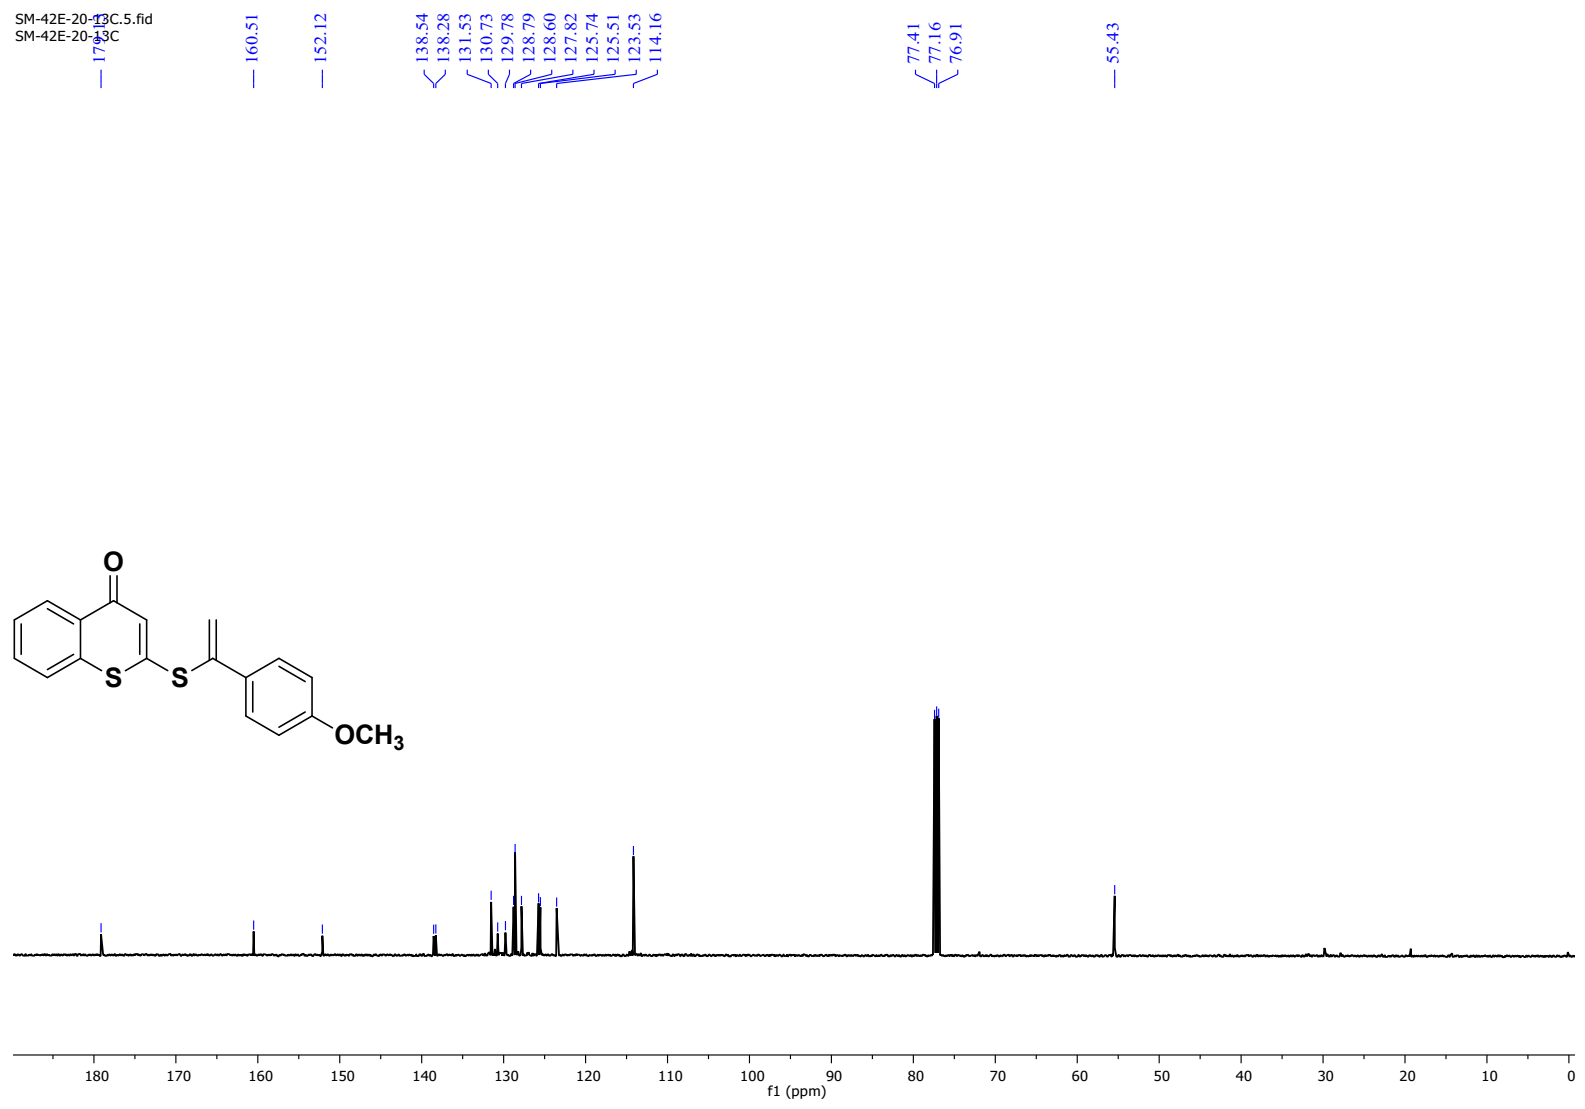

# HRMS of compound 3d

|               |                   |             |                    |                 |              |                        |                       |
|---------------|-------------------|-------------|--------------------|-----------------|--------------|------------------------|-----------------------|
| Sample Name   | SAMPLE 10         | Position    | P1-A9              | Instrument Name | Instrument 1 | User Name              |                       |
| Inj Vol       | 20                | InjPosition |                    | SampleType      | Sample       | IRM Calibration Status | Success               |
| Data Filename | ATK-SM-42E2-20A.d | ACQ Method  | ESI ALS 100-1000.m | Comment         |              | Acquired Time          | 1/28/2021 12:54:08 PM |

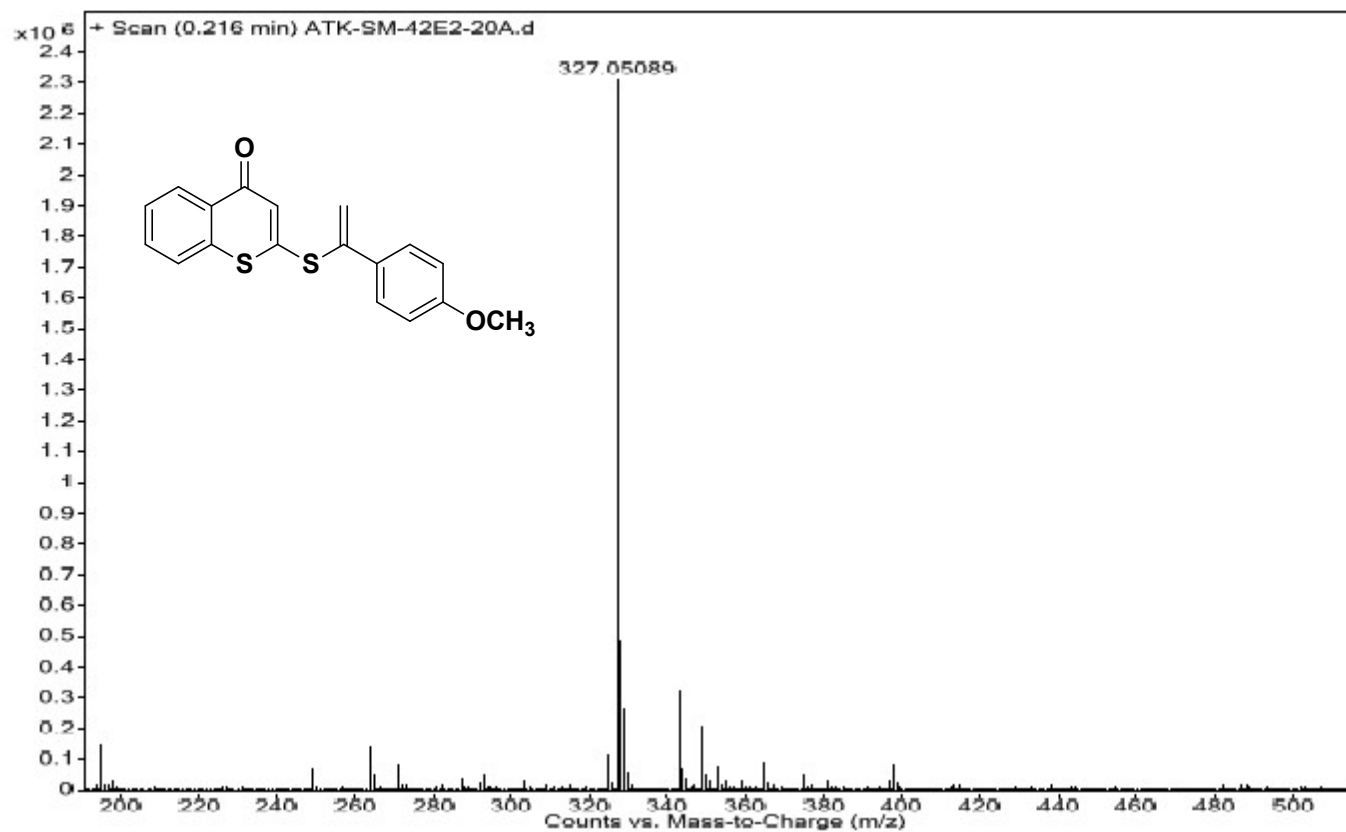

<sup>1</sup>H NMR of compound 3e

SM-42F2-19-1H.1.fid  
SM-42F2-19-1H

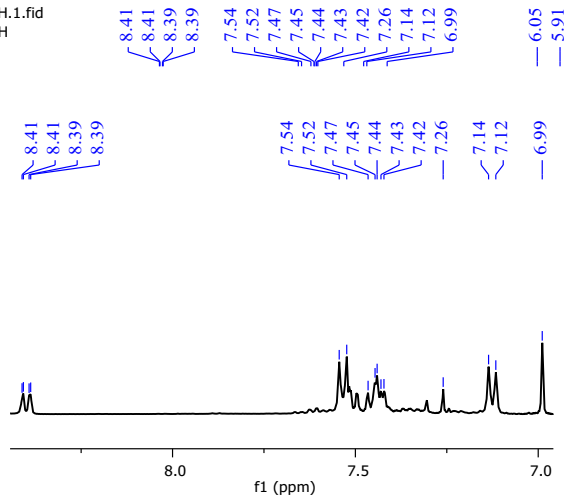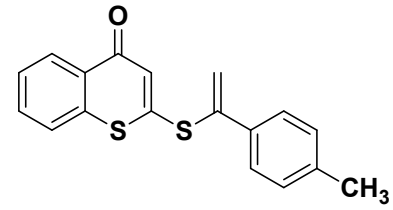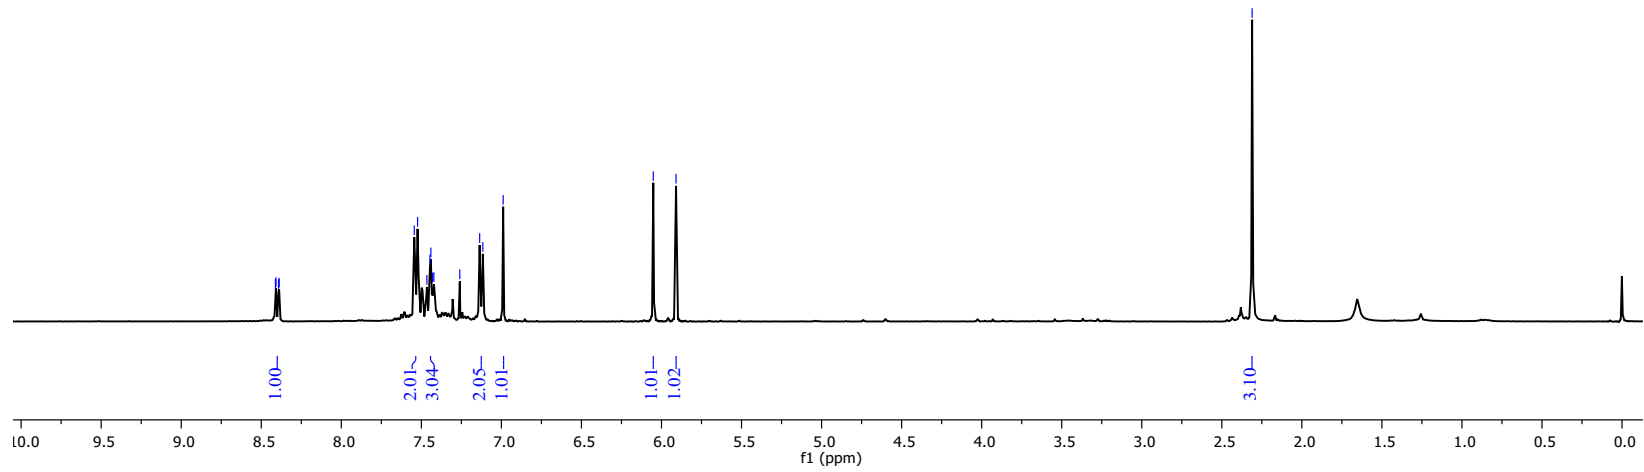

### <sup>13</sup>C NMR of compound 3e

SM-42F2-19-13C.3.fid  
SM-42F2-19-13C

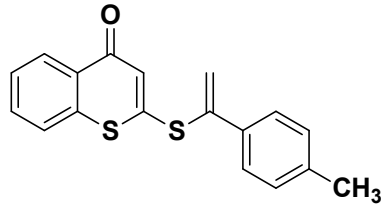

179.12  
152.00  
139.45  
139.02  
138.27  
134.50  
131.51  
130.74  
129.51  
128.78  
127.81  
127.14  
125.74  
125.58  
124.53

77.48  
77.16  
76.84

21.31

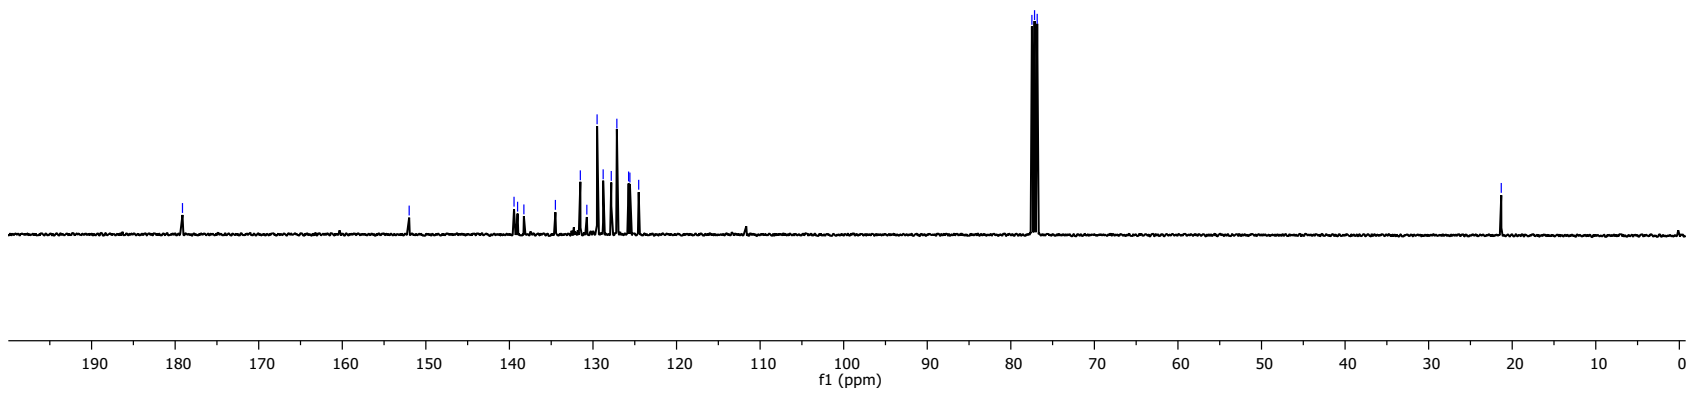



# HRMS of compound 3e

|               |                  |             |                    |                 |              |                        |                      |
|---------------|------------------|-------------|--------------------|-----------------|--------------|------------------------|----------------------|
| Sample Name   | WASH             | Position    | P1-B2              | Instrument Name | Instrument 1 | User Name              |                      |
| Inj Vol       | 20               | InjPosition |                    | SampleType      | Sample       | IRM Calibration Status | Success              |
| Data Filename | ATK-SM-42F2-20.d | ACQ Method  | ESI ALS 100-1000.m | Comment         |              | Acquired Time          | 1/22/2021 2:02:17 PM |

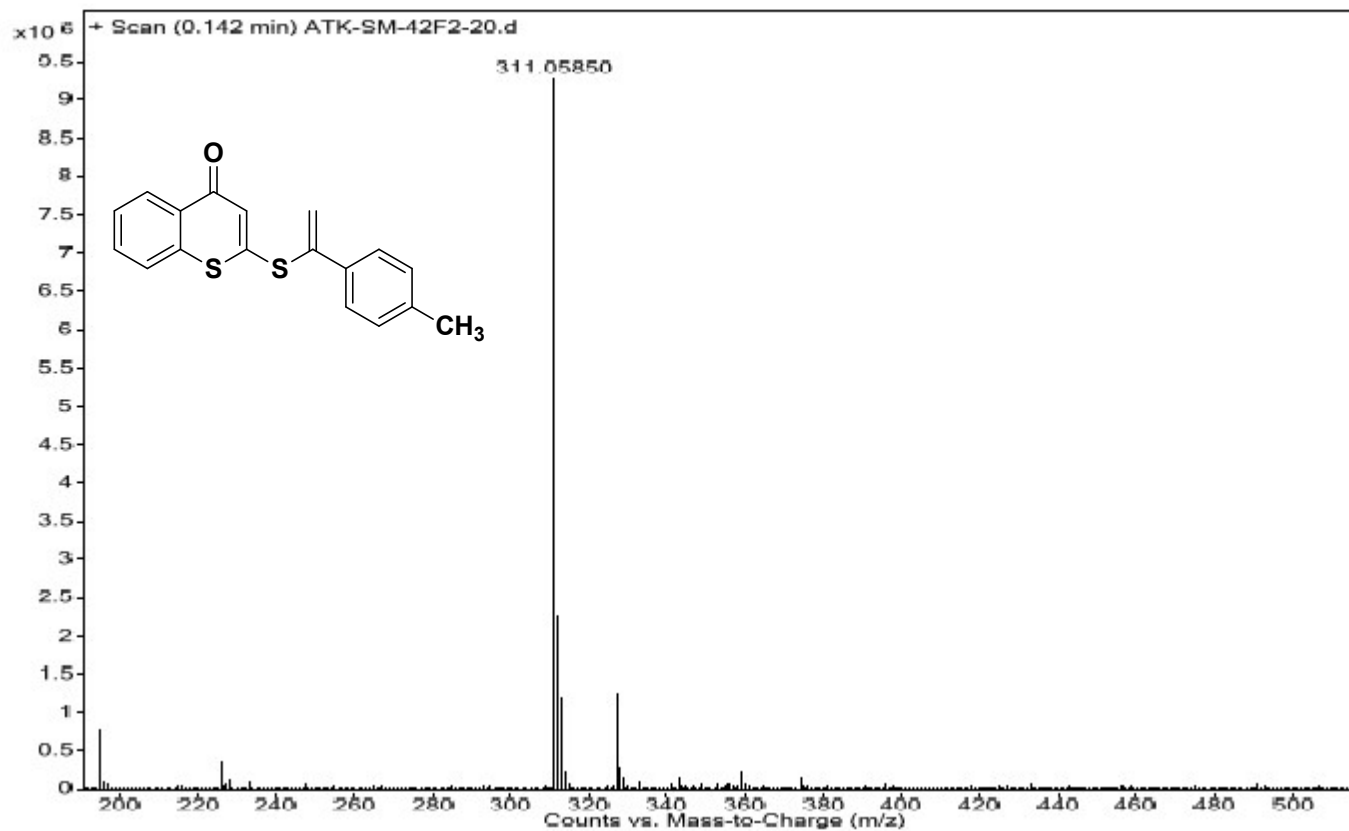

# <sup>1</sup>H NMR of compound 3f

ATK-SM-42D-20-1H  
ATK-SM-42D-20-1H

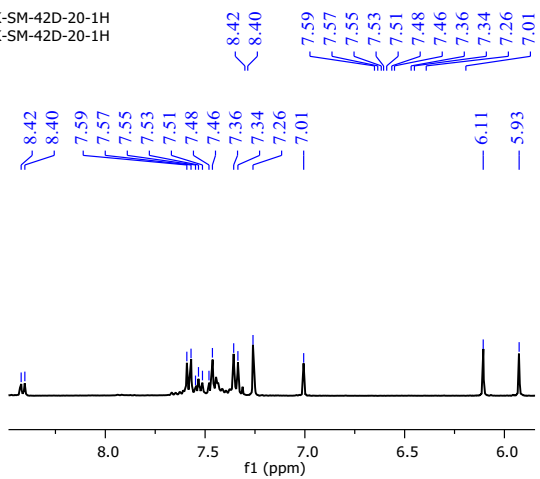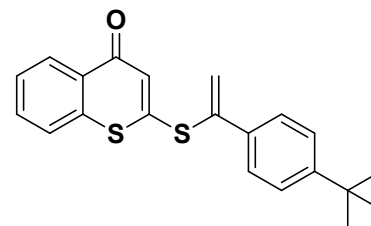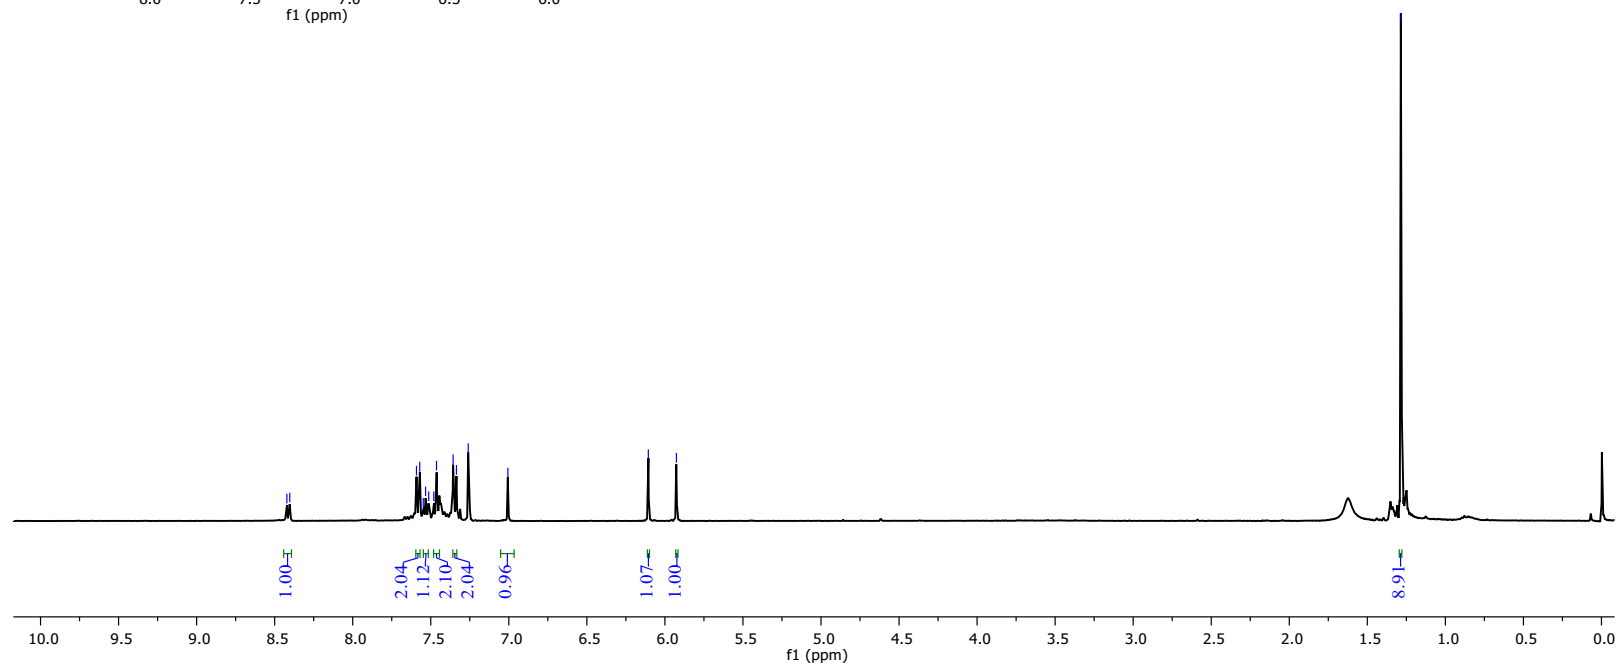

<sup>13</sup>C NMR of compound 3f

ATK-SM-42D-20-13C  
ATK-SM-42D-20-13C

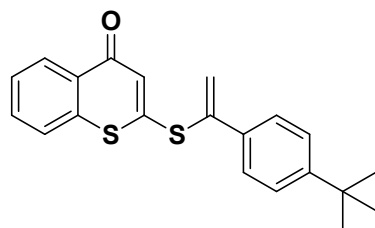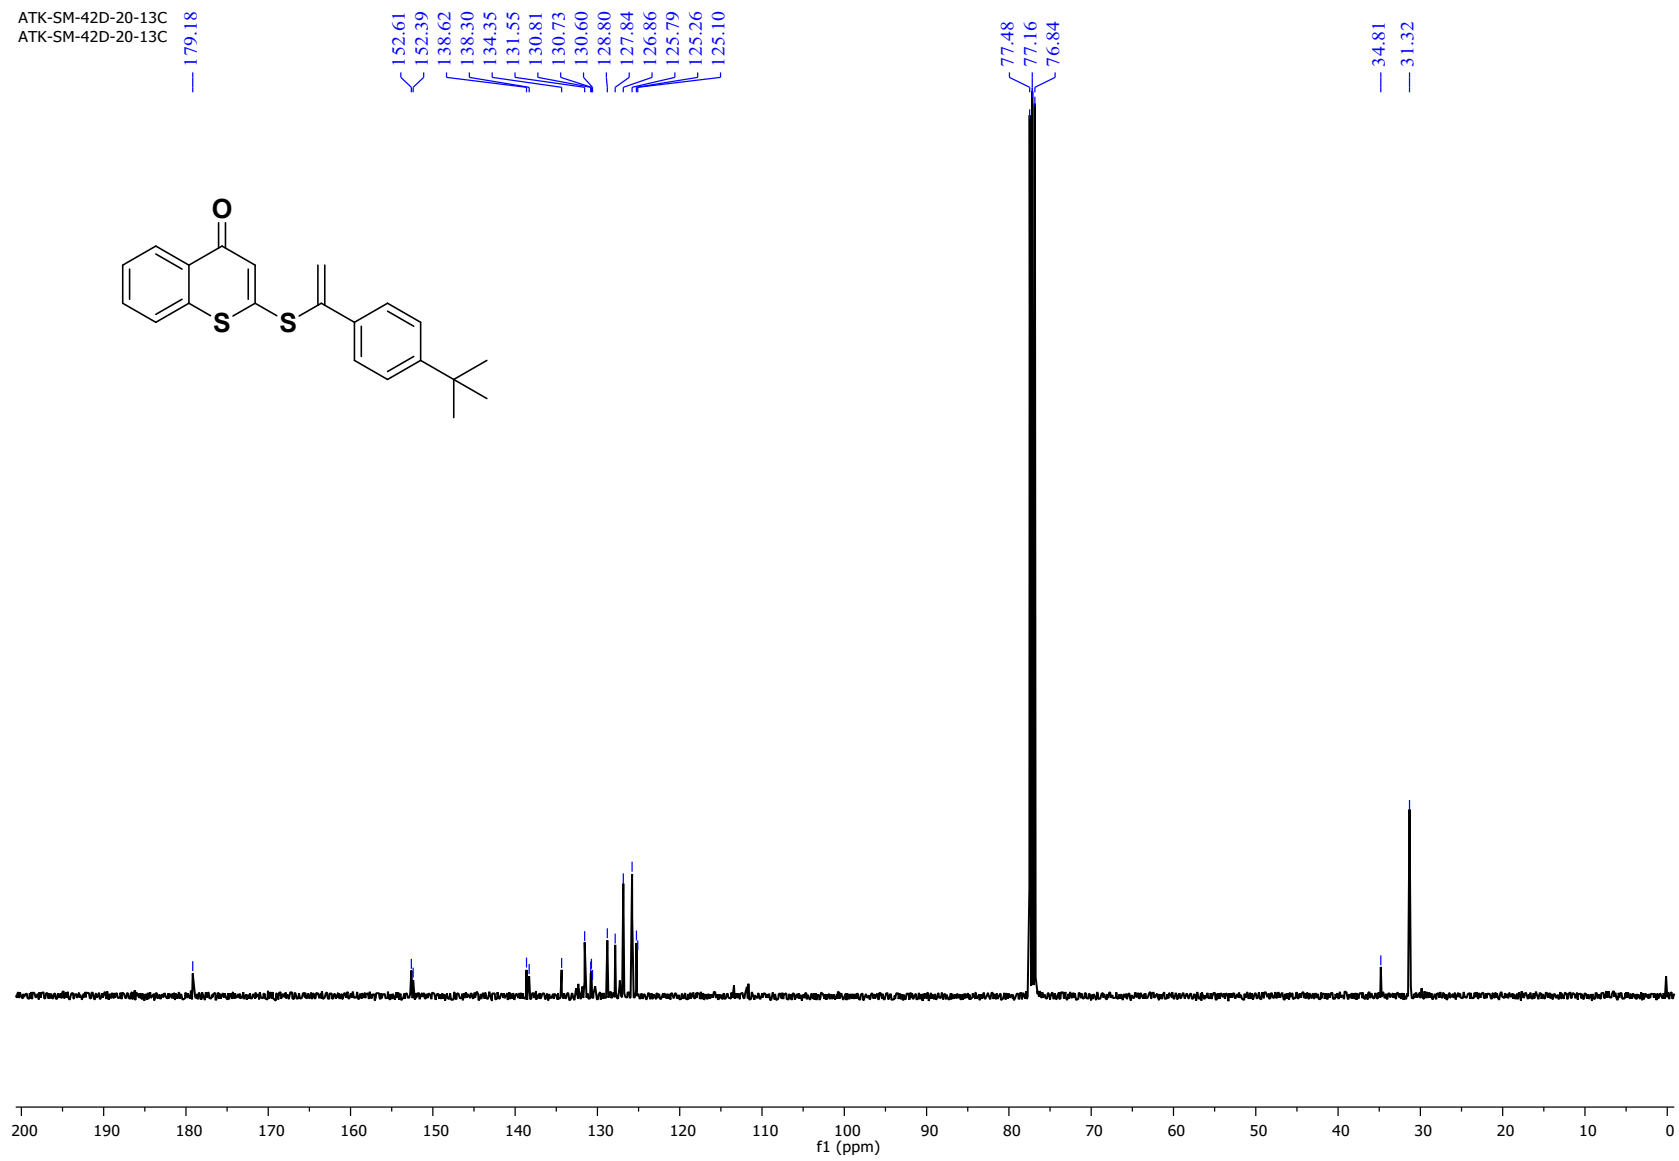

# HRMS of compound 3f

|                      |                 |                    |                    |                        |              |                               |                      |
|----------------------|-----------------|--------------------|--------------------|------------------------|--------------|-------------------------------|----------------------|
| <b>Sample Name</b>   | SAMPLE          | <b>Position</b>    | P1-A11             | <b>Instrument Name</b> | Instrument 1 | <b>User Name</b>              |                      |
| <b>Inj Vol</b>       | 20              | <b>InjPosition</b> |                    | <b>SampleType</b>      | Sample       | <b>IRM Calibration Status</b> | Success              |
| <b>Data Filename</b> | ATK-SM-42D-20.d | <b>ACQ Method</b>  | ESI ALS 100-1000.m | <b>Comment</b>         |              | <b>Acquired Time</b>          | 1/22/2021 1:51:01 PM |

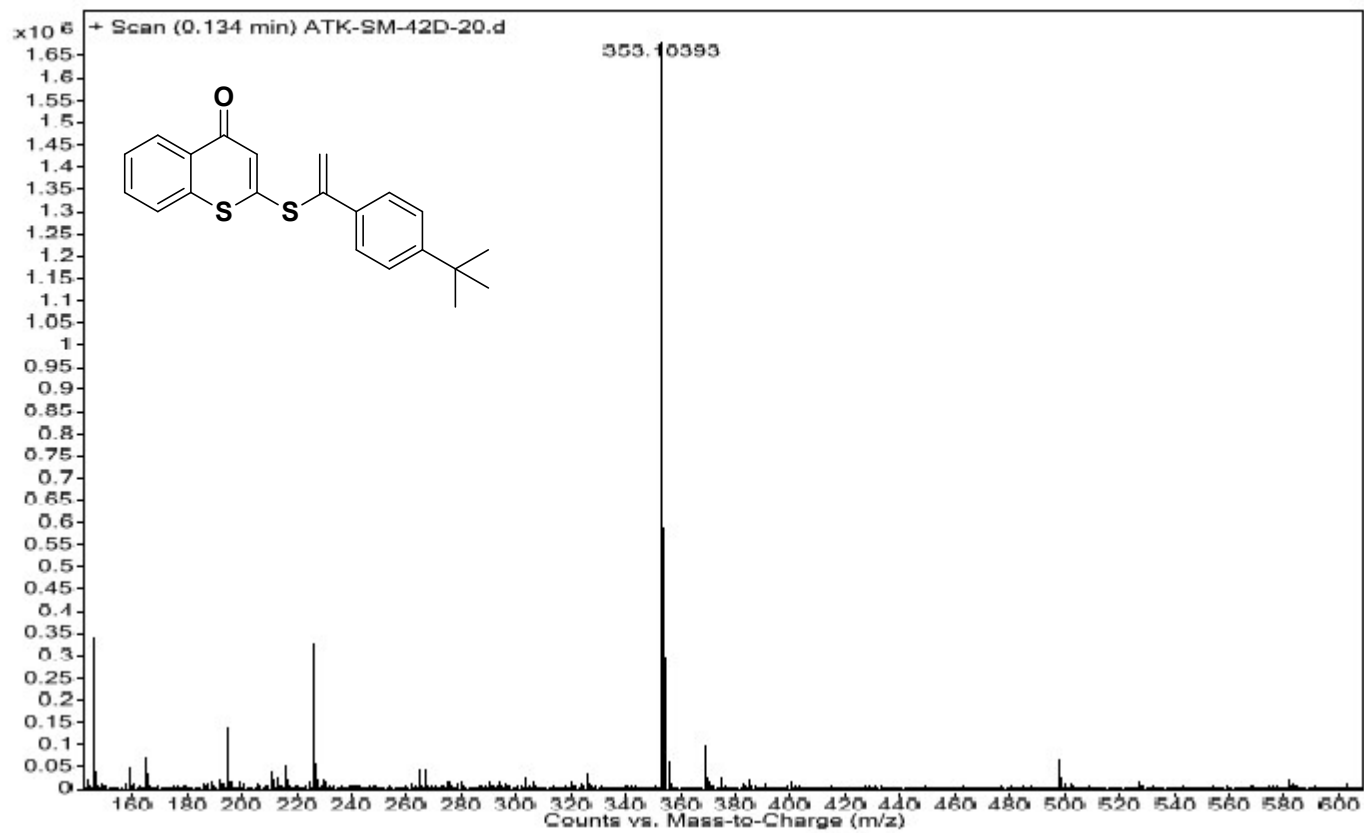

<sup>1</sup>H NMR of compound 3g

SM-42K-20-1H.1.fid  
SM-42K-20-1H

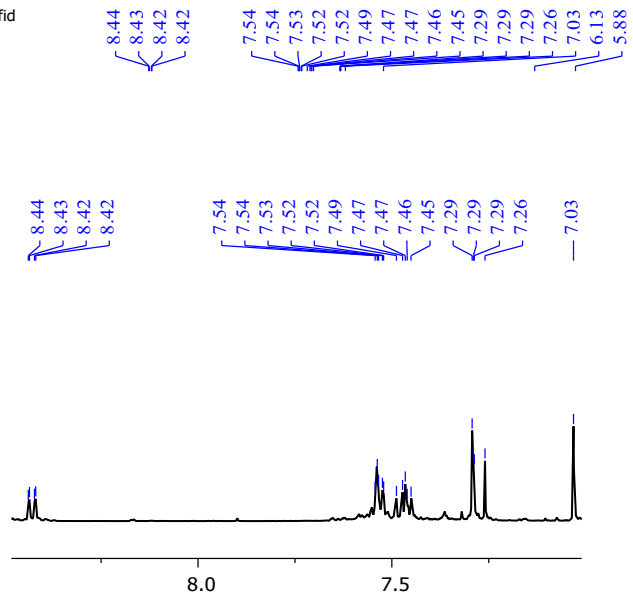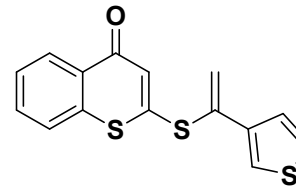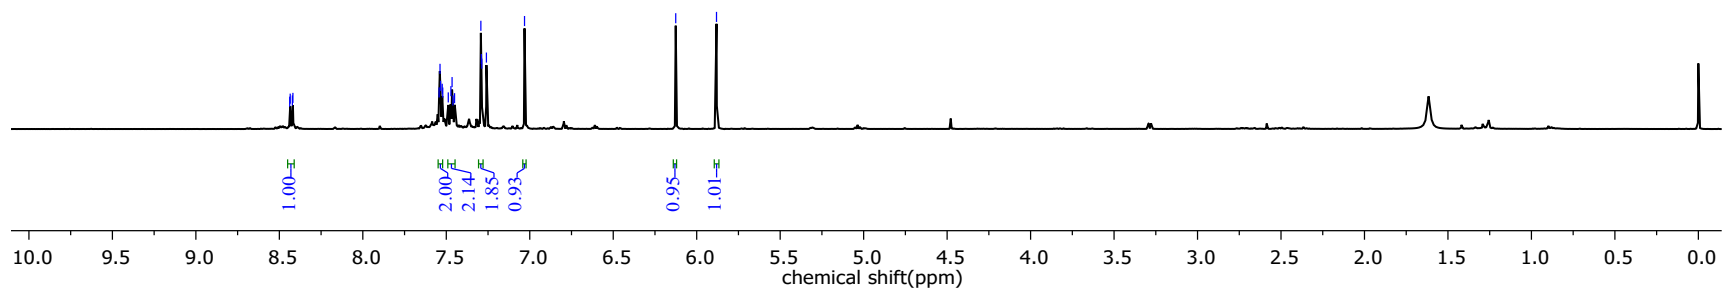

SM-42K-20-13C.1.fid  
SM-42K-20-13C

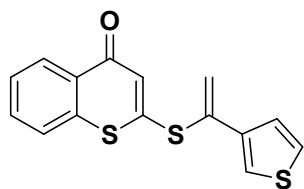

### <sup>13</sup>C NMR of compound 3g

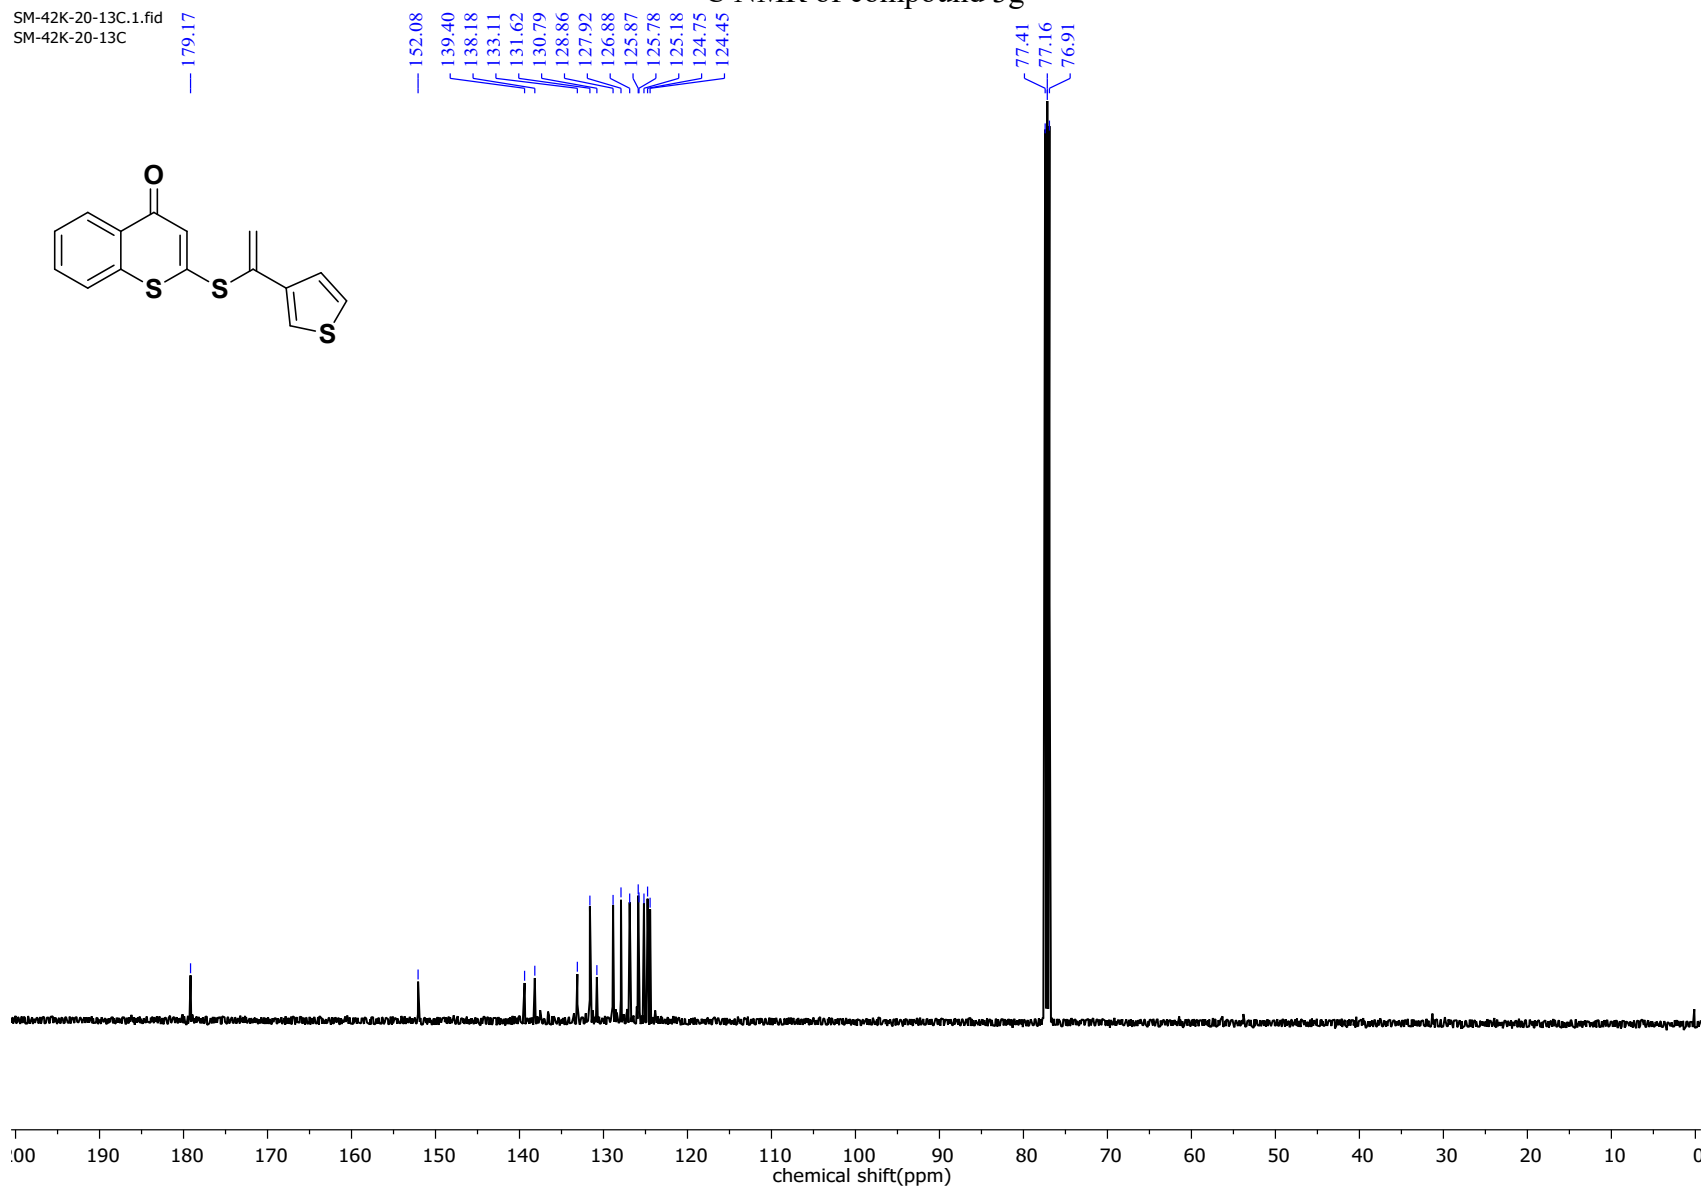

HRMS of compound 3g

|               |                  |             |                    |                 |              |                        |                      |
|---------------|------------------|-------------|--------------------|-----------------|--------------|------------------------|----------------------|
| Sample Name   | SAMPLE           | Position    | P2-A10             | Instrument Name | Instrument 1 | User Name              |                      |
| Inj Vol       | 20               | InjPosition |                    | SampleType      | Sample       | IRM Calibration Status | Success              |
| Data Filename | ATK-SM-42K1-20.d | ACQ Method  | ESI ALS 100-1000.m | Comment         |              | Acquired Time          | 1/23/2021 4:01:59 PM |

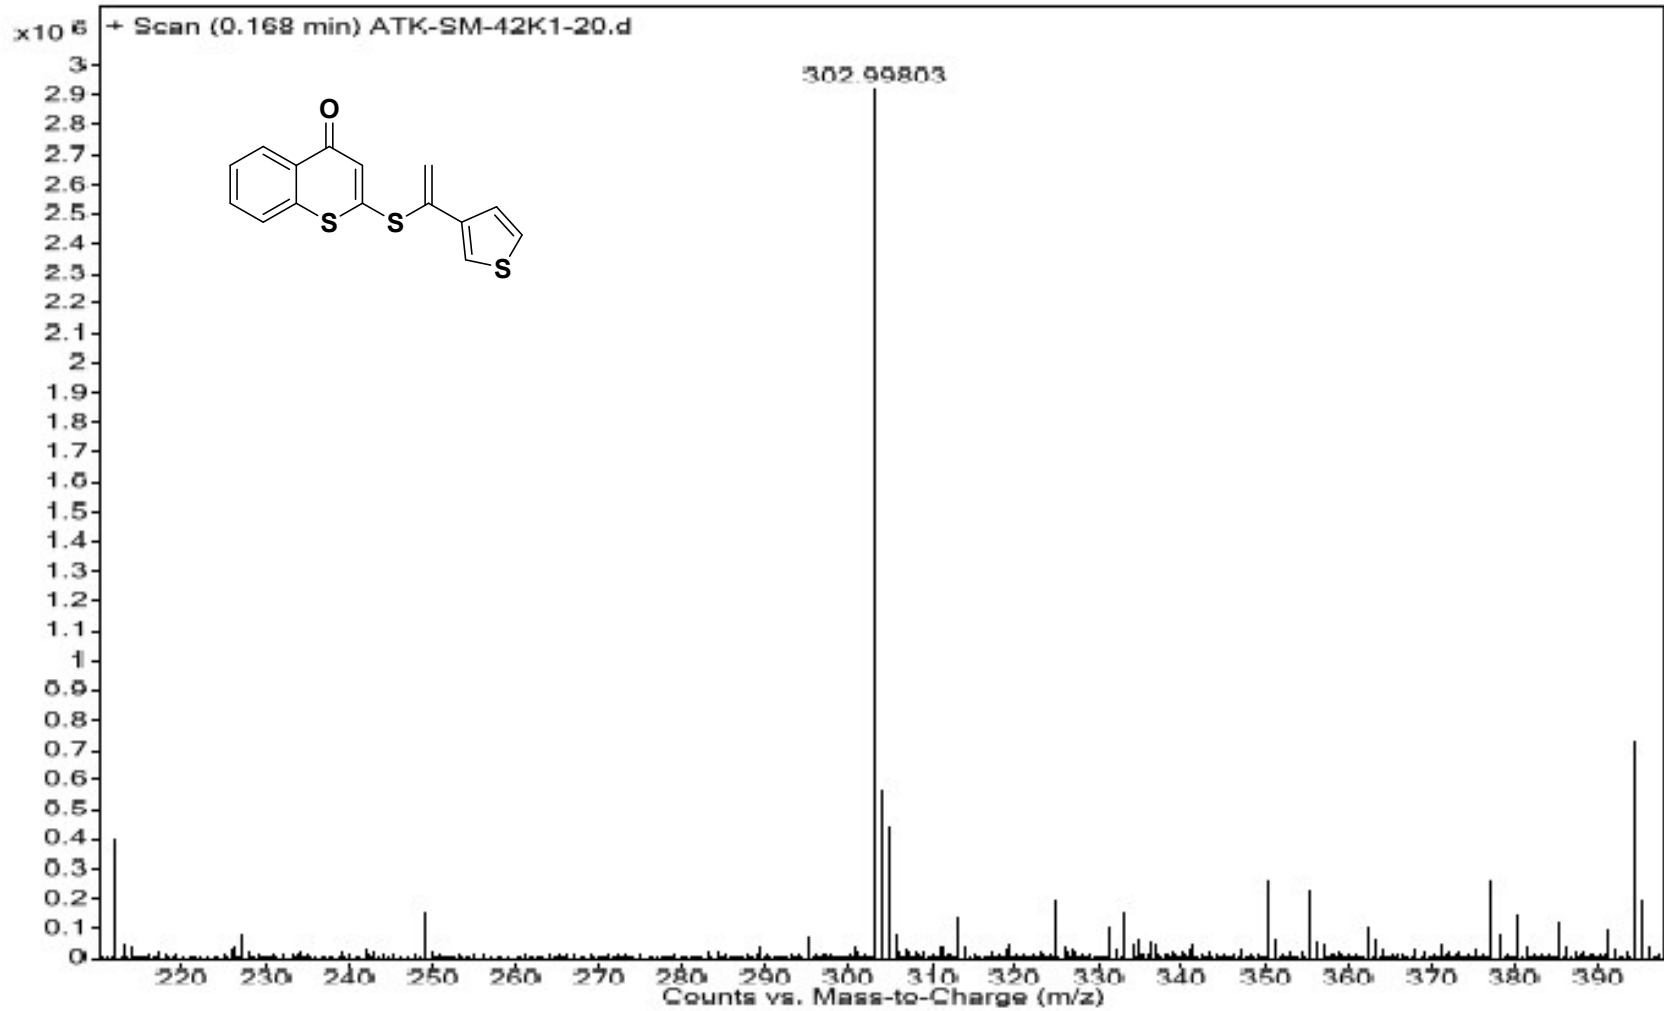

# <sup>1</sup>H NMR of compound 3h

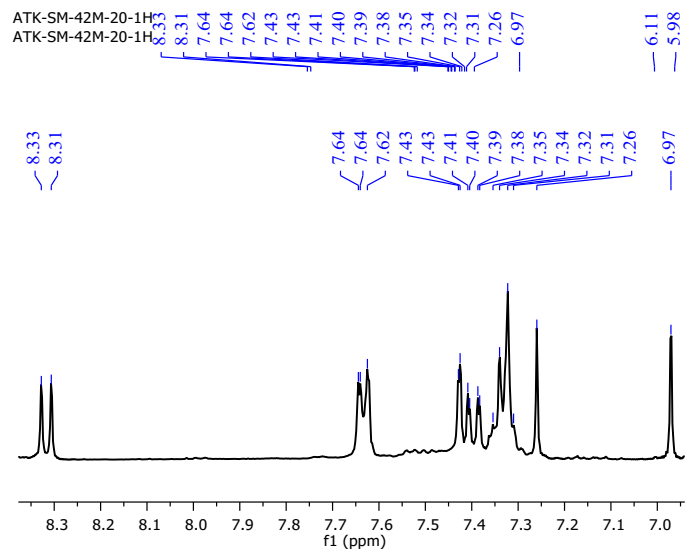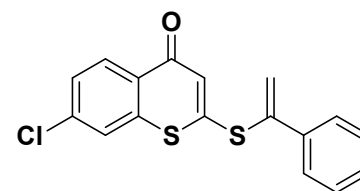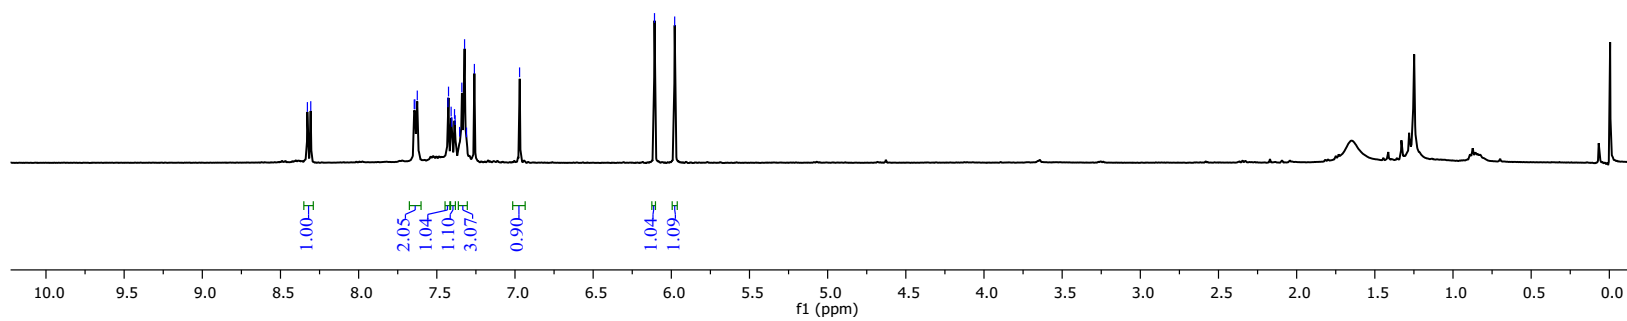



<sup>13</sup>C NMR of compound 3h

ATK-SM-42M-20-13C  
ATK-SM-42M-20-13C

178.28

151.77

139.47

138.85

138.32

137.17

130.34

129.46

129.04

128.86

128.51

127.23

125.84

125.62

125.08

77.48

77.16

76.84

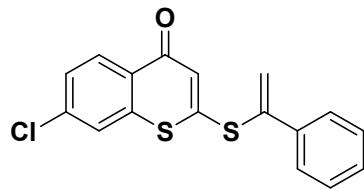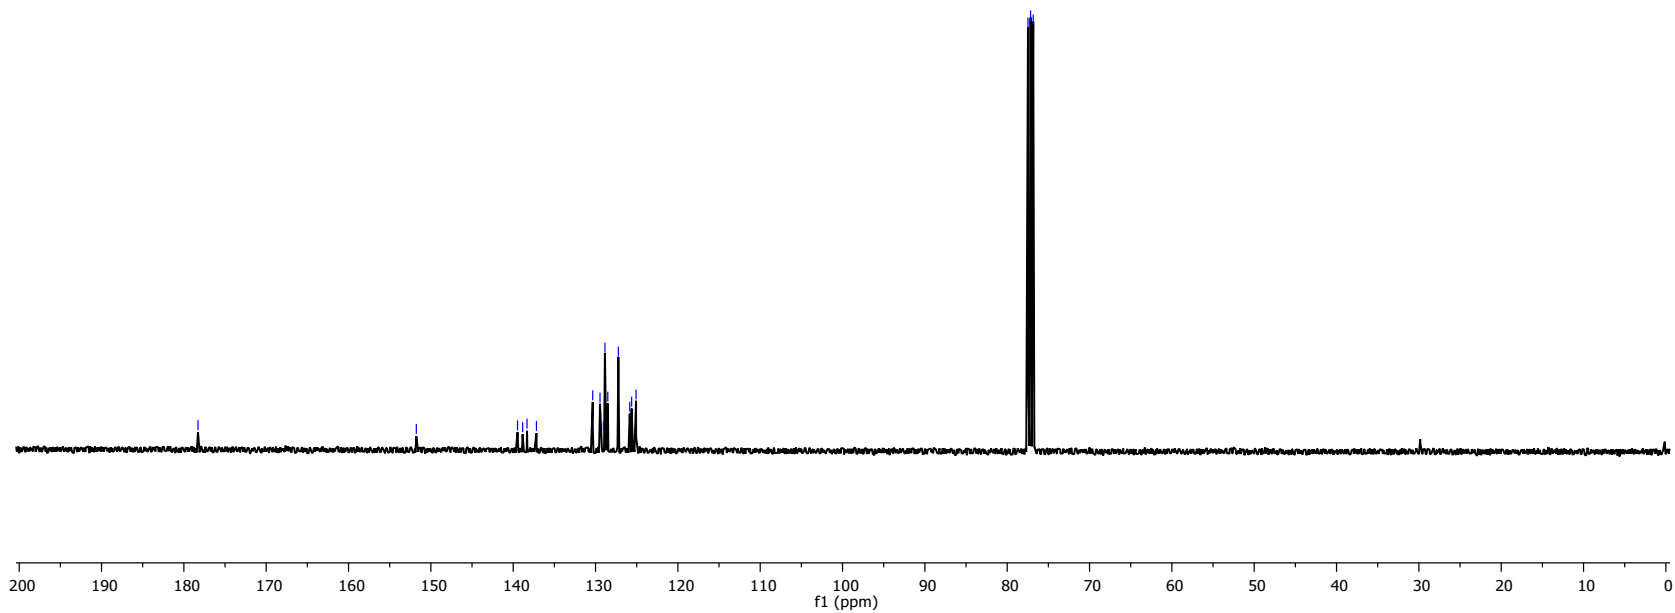

# HRMS of compound 3h

|               |                 |             |                    |                 |              |                        |                     |
|---------------|-----------------|-------------|--------------------|-----------------|--------------|------------------------|---------------------|
| Sample Name   | SAMPLE 12       | Position    | P2-B3              | Instrument Name | Instrument 1 | User Name              |                     |
| Inj Vol       | 20              | InjPosition |                    | SampleType      | Sample       | IRM Calibration Status | Success             |
| Data Filename | ATK-SM-42M-20.d | ACQ Method  | ESI ALS 100-1000.m | Comment         |              | Acquired Time          | 2/1/2021 6:56:01 PM |

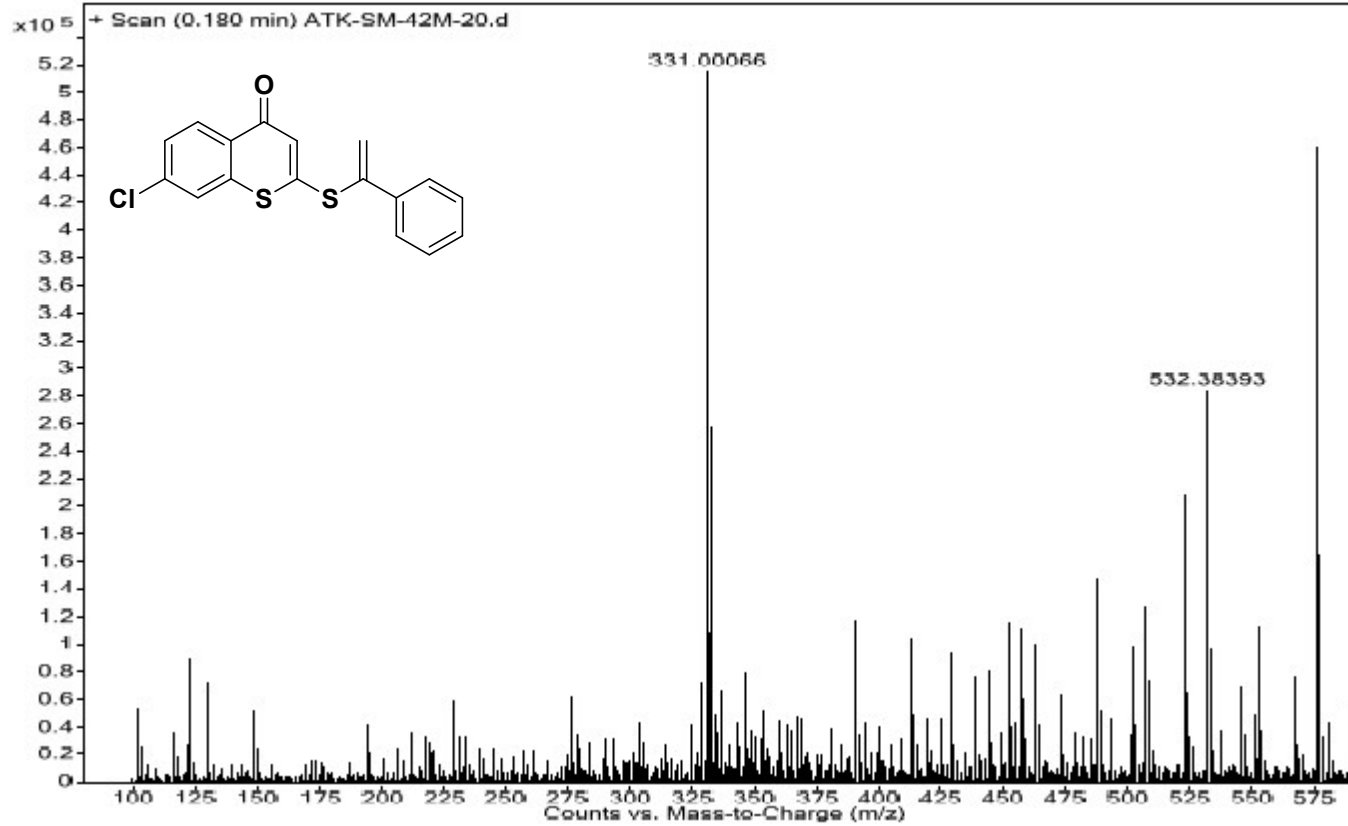

# <sup>1</sup>H NMR of compound 3i

ATK-SM-42N-20-1H  
ATK-SM-42N-20-1H

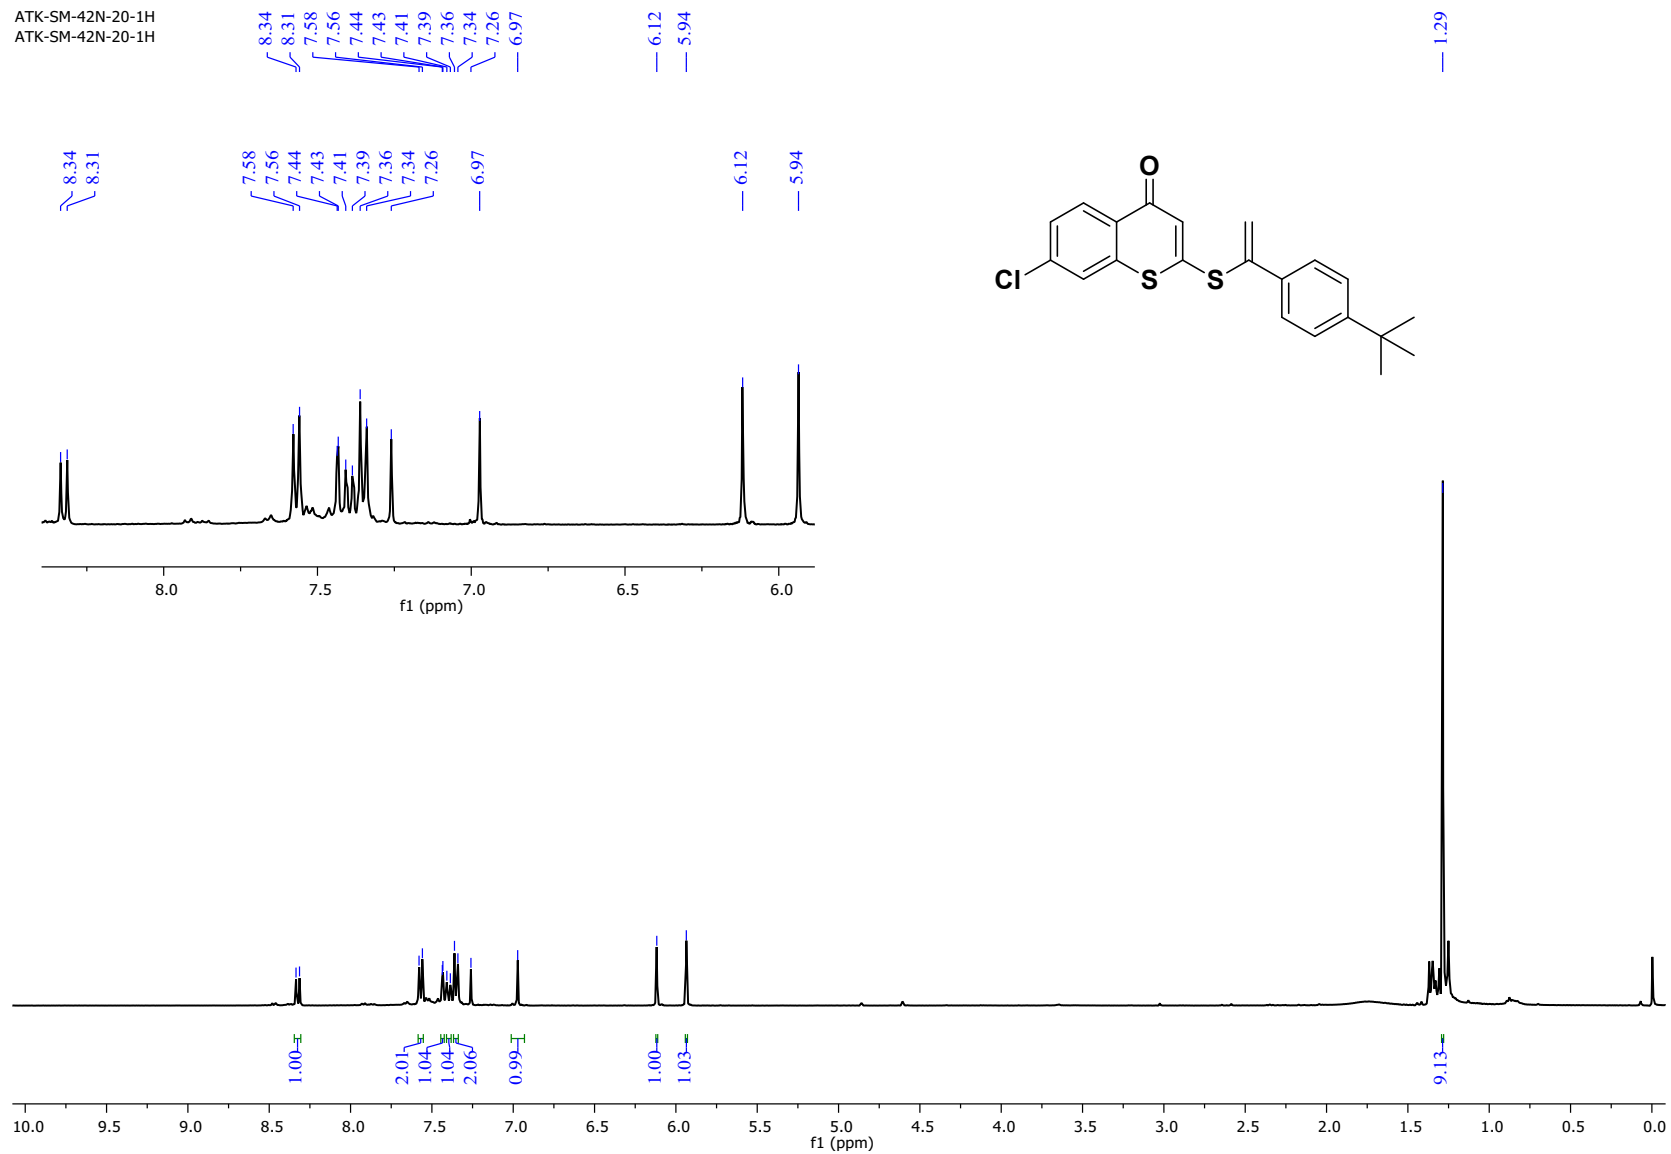

<sup>13</sup>C NMR of compound 3i

ATK-SM-42N-20-13C  
ATK-SM-42N-20-13C

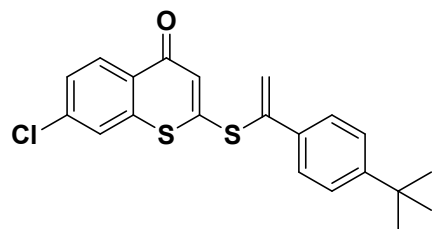

178.29

152.72

152.36

139.53

138.31

138.27

134.19

130.32

129.07

128.46

126.82

125.84

125.52

125.14

125.08

77.48

77.16

76.84

34.81

31.31

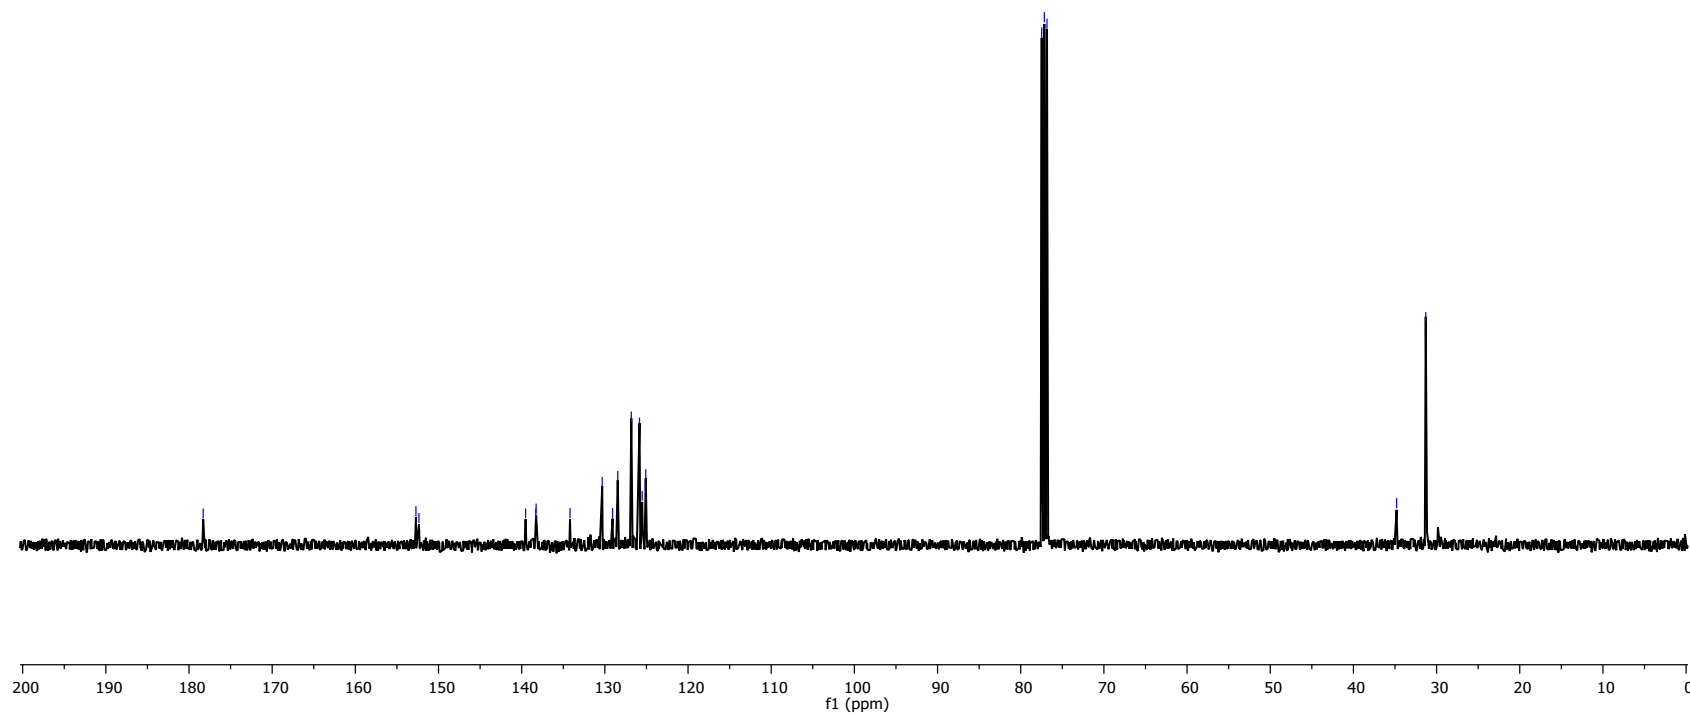

# HRMS of compound 3i

|               |               |             |                   |                 |              |                        |                       |
|---------------|---------------|-------------|-------------------|-----------------|--------------|------------------------|-----------------------|
| Sample Name   | WASH          | Position    | P1-A4             | Instrument Name | Instrument 1 | User Name              |                       |
| Inj Vol       | 20            | InjPosition |                   | SampleType      | Sample       | IRM Calibration Status | Success               |
| Data Filename | SM-42N-20-R.d | ACQ Method  | ESI ALS 100-500.m | Comment         |              | Acquired Time          | 2/19/2021 12:33:05 PM |

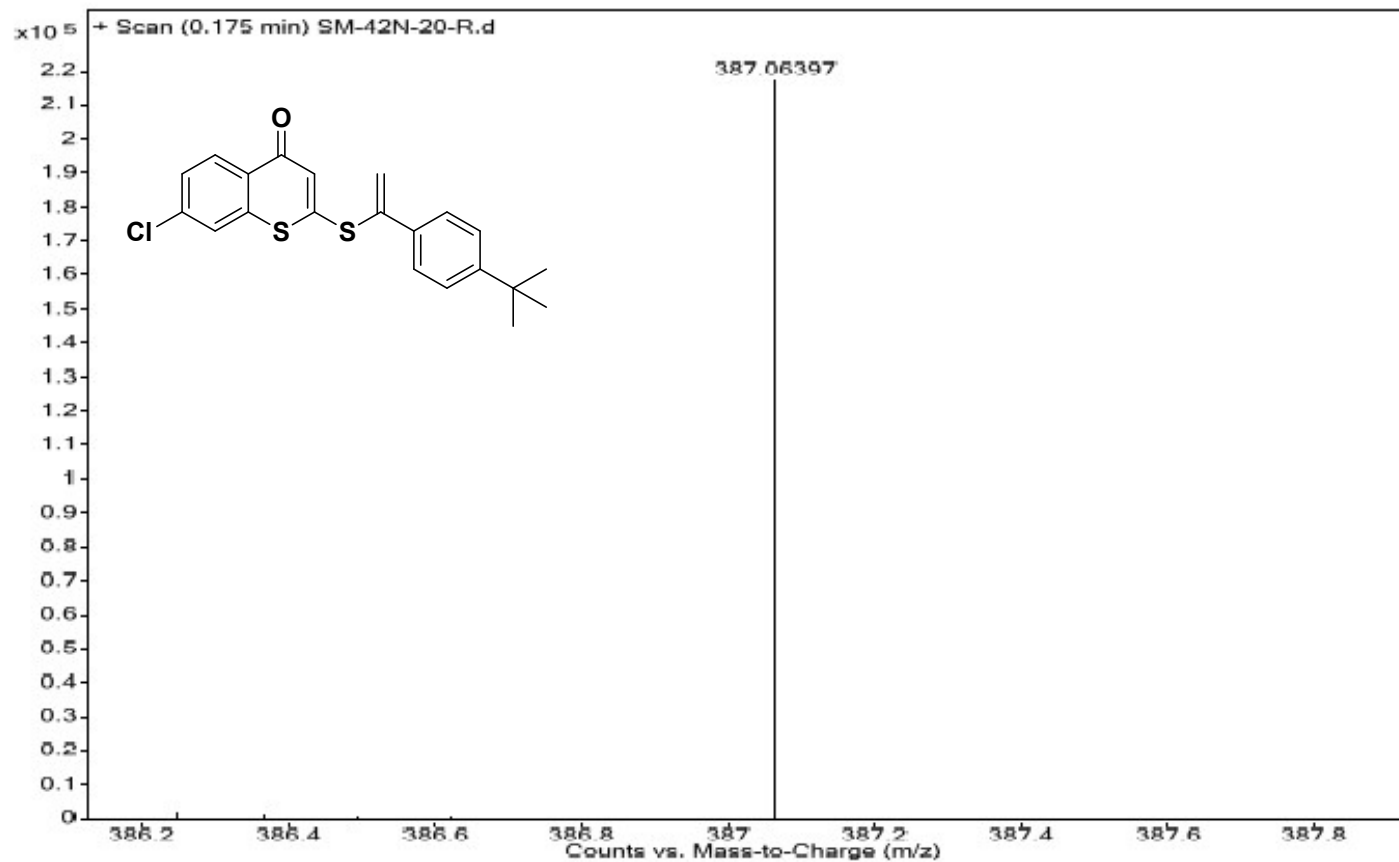

<sup>1</sup>HNMR of compound 3j

SM-420-20-1H.1.fid  
SM-420-20-1H

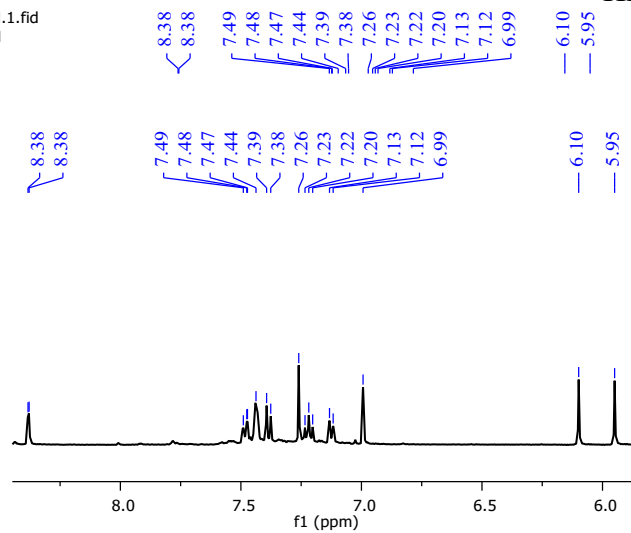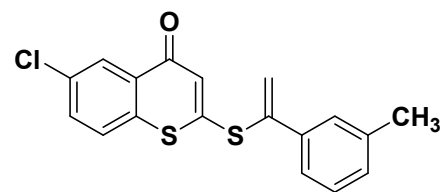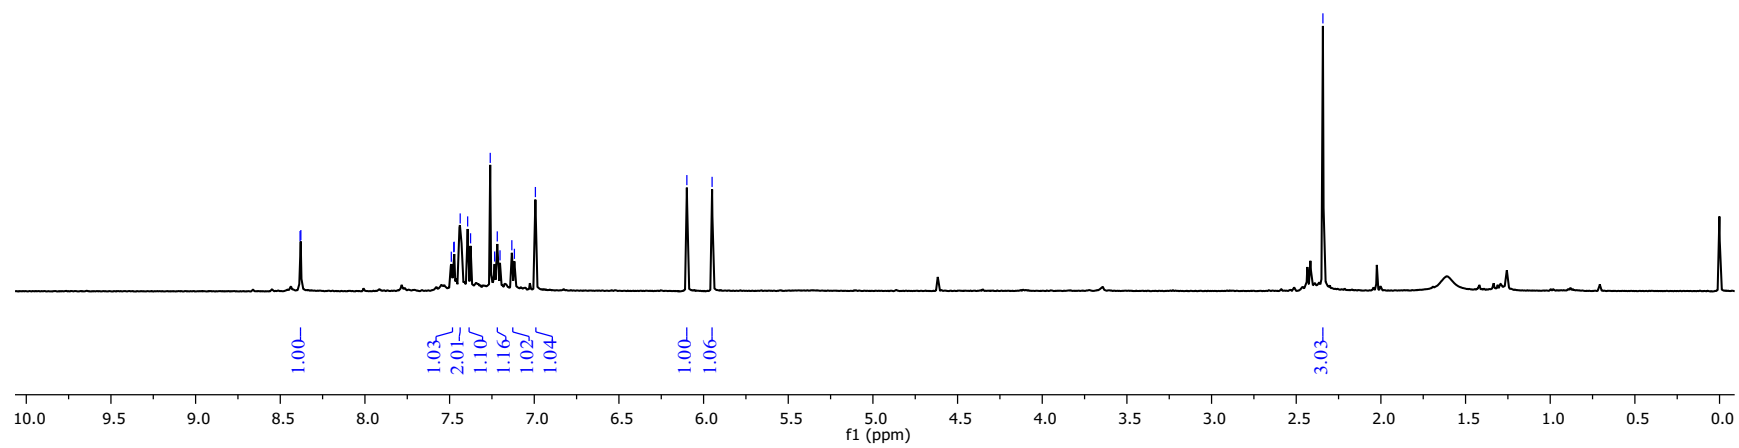

<sup>13</sup>C NMR of compound 3j

SM-420-20-13C.1.fid  
SM-420-20-13C

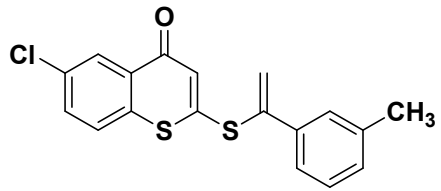

152.52  
139.01  
138.55  
137.20  
136.32  
134.43  
131.96  
130.31  
128.74  
128.45  
127.81  
127.17  
125.63  
125.15  
124.45

77.41  
77.16  
76.91

21.58

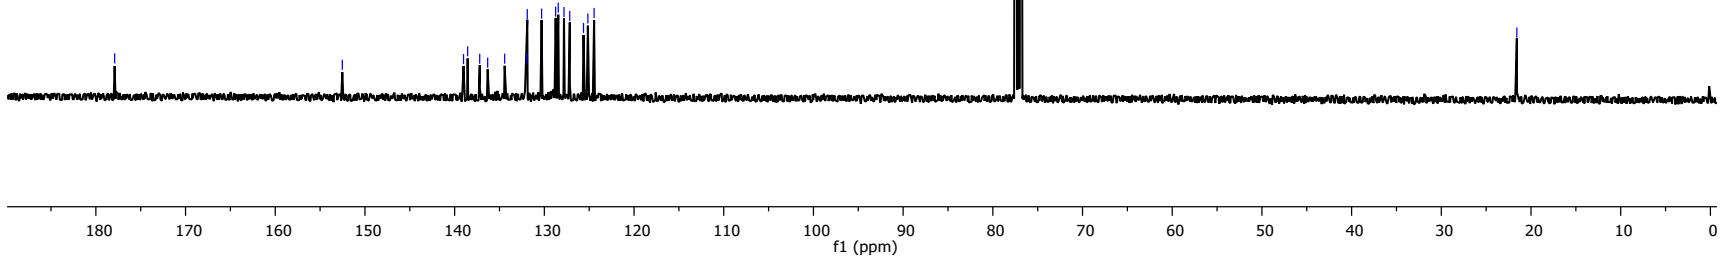

# HRMS of compound 3j

|               |                 |             |                   |                 |              |                        |                      |
|---------------|-----------------|-------------|-------------------|-----------------|--------------|------------------------|----------------------|
| Sample Name   | SAMPLE 3        | Position    | P1-B4             | Instrument Name | Instrument 1 | User Name              |                      |
| Inj Vol       | 20              | InjPosition |                   | SampleType      | Sample       | IRM Calibration Status | Success              |
| Data Filename | ATK-SM-420-20.d | ACQ Method  | ESI ALS 100-600.m | Comment         |              | Acquired Time          | 2/4/2021 10:53:31 AM |

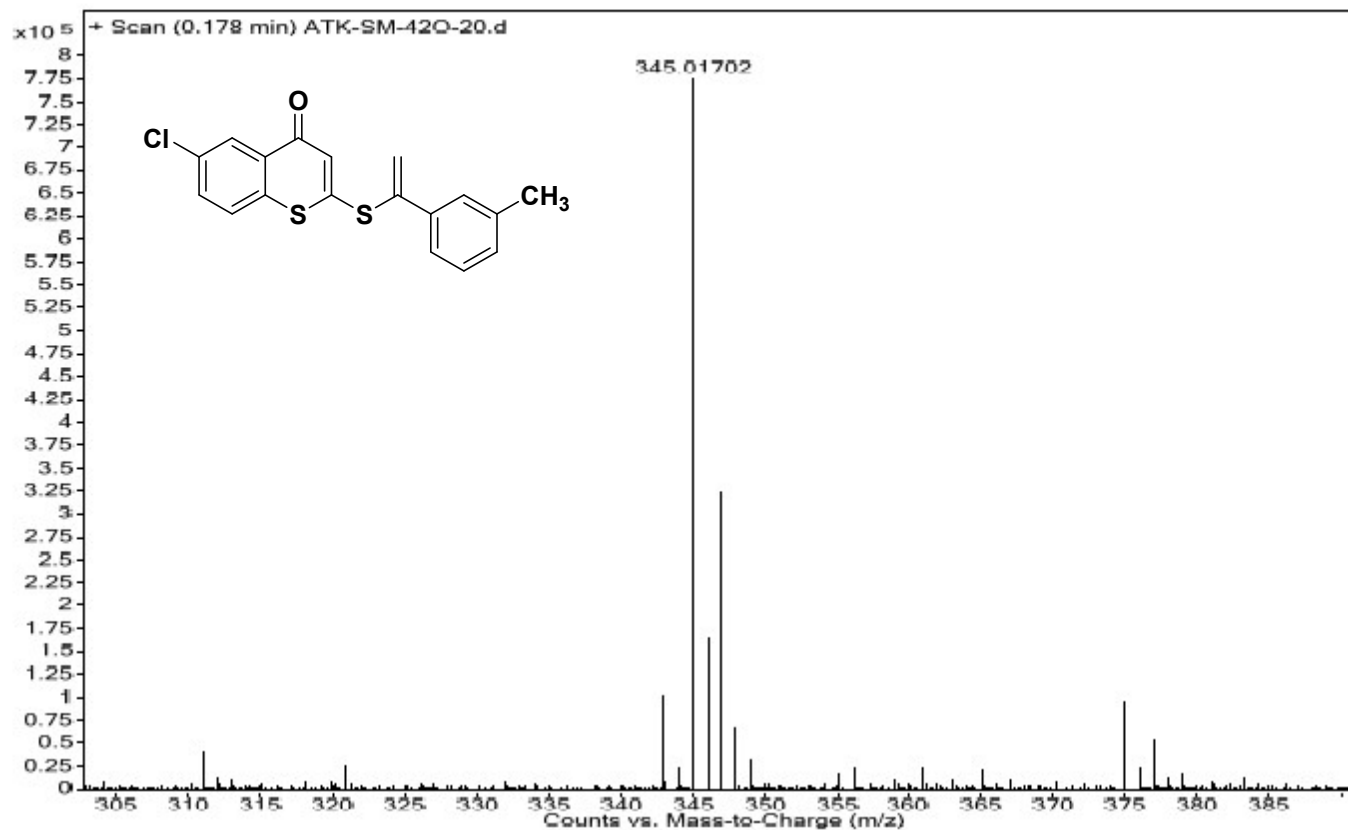



# <sup>1</sup>H NMR of compound 3k

SM-42Q-1H.4.fid  
SM-42Q-1H

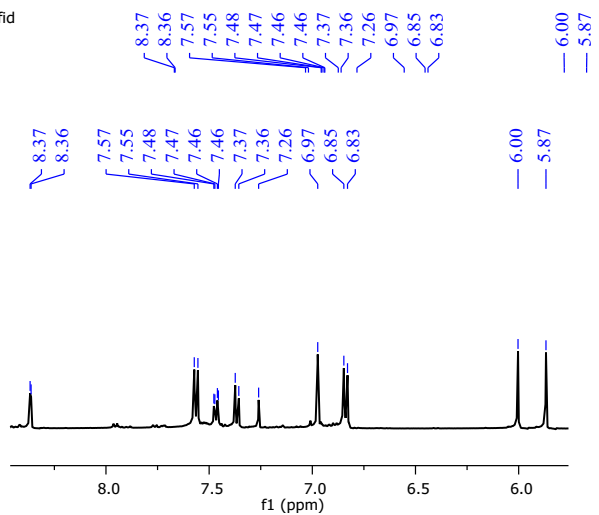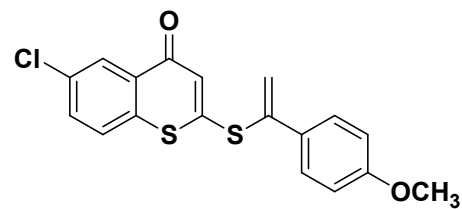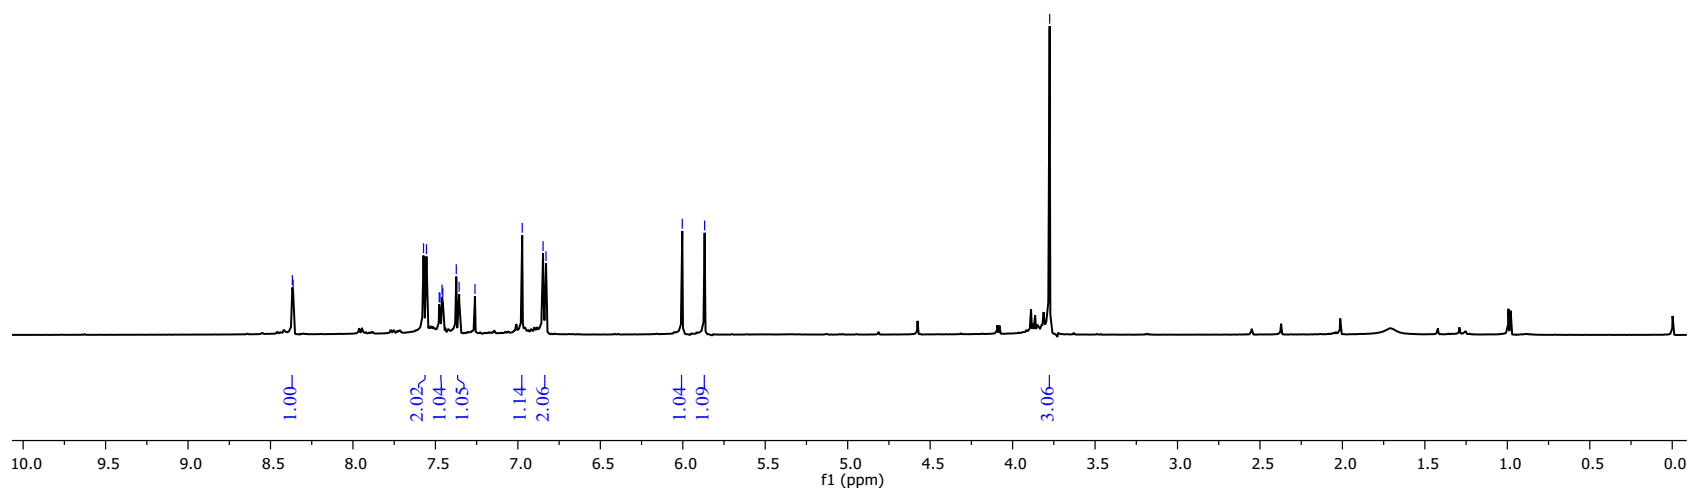

<sup>13</sup>C NMR of compound 3k

SM-42Q-20-1H.1.fid  
SM-42Q-20-1H

- 177.85
- 160.58
- 152.72
- 138.24
- 136.30
- 134.37
- 131.90
- 131.86
- 129.60
- 128.57
- 128.40
- 127.14
- 124.97
- 123.98
- 114.20
- 77.41
- 77.16
- 76.91
- 55.44

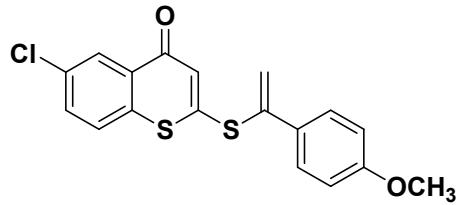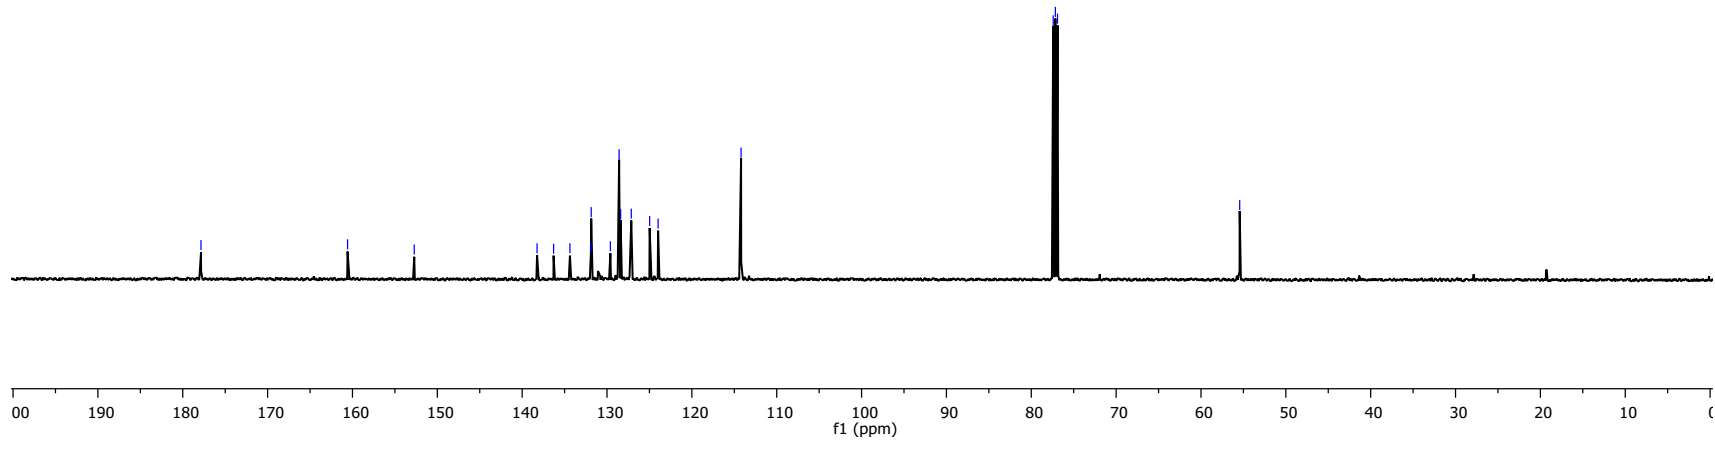

# HRMS of compound 3k

|               |                 |             |                    |                 |              |                        |                      |
|---------------|-----------------|-------------|--------------------|-----------------|--------------|------------------------|----------------------|
| Sample Name   | SAMPLE 2        | Position    | P1-B6              | Instrument Name | Instrument 1 | User Name              |                      |
| Inj Vol       | 20              | InjPosition |                    | SampleType      | Sample       | IRM Calibration Status | Success              |
| Data Filename | ATK-SM-42Q-20.d | ACQ Method  | ESI ALS 100-1000.m | Comment         |              | Acquired Time          | 2/4/2021 11:07:06 AM |

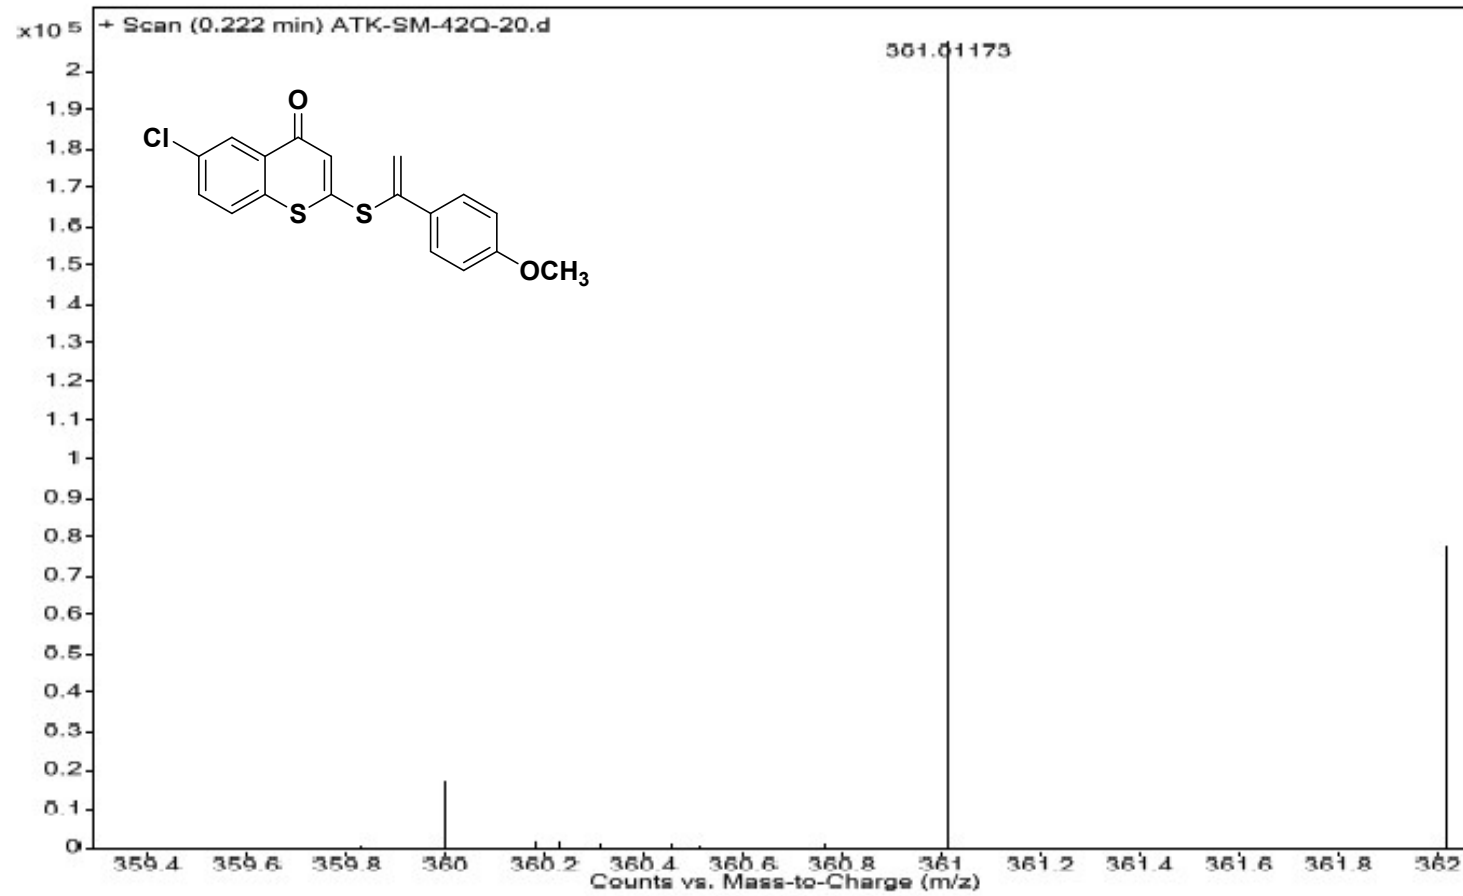

SM-42P-20-1H.1.fid  
SM-42P-20-1H

### <sup>1</sup>H NMR of compound 31

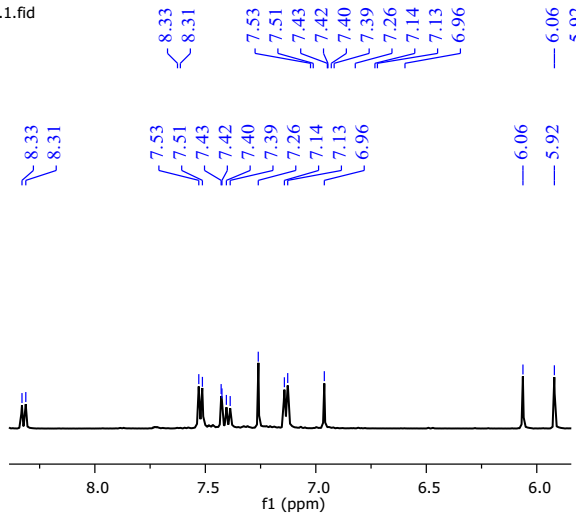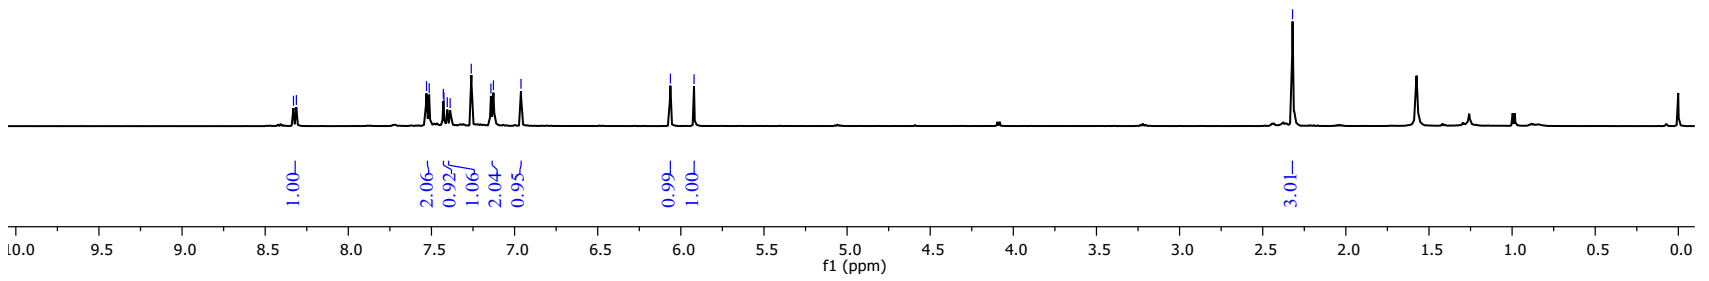

SM-42P-20-13C.1.fid  
SM-42P-20-13C

### <sup>13</sup>C NMR of compound 31

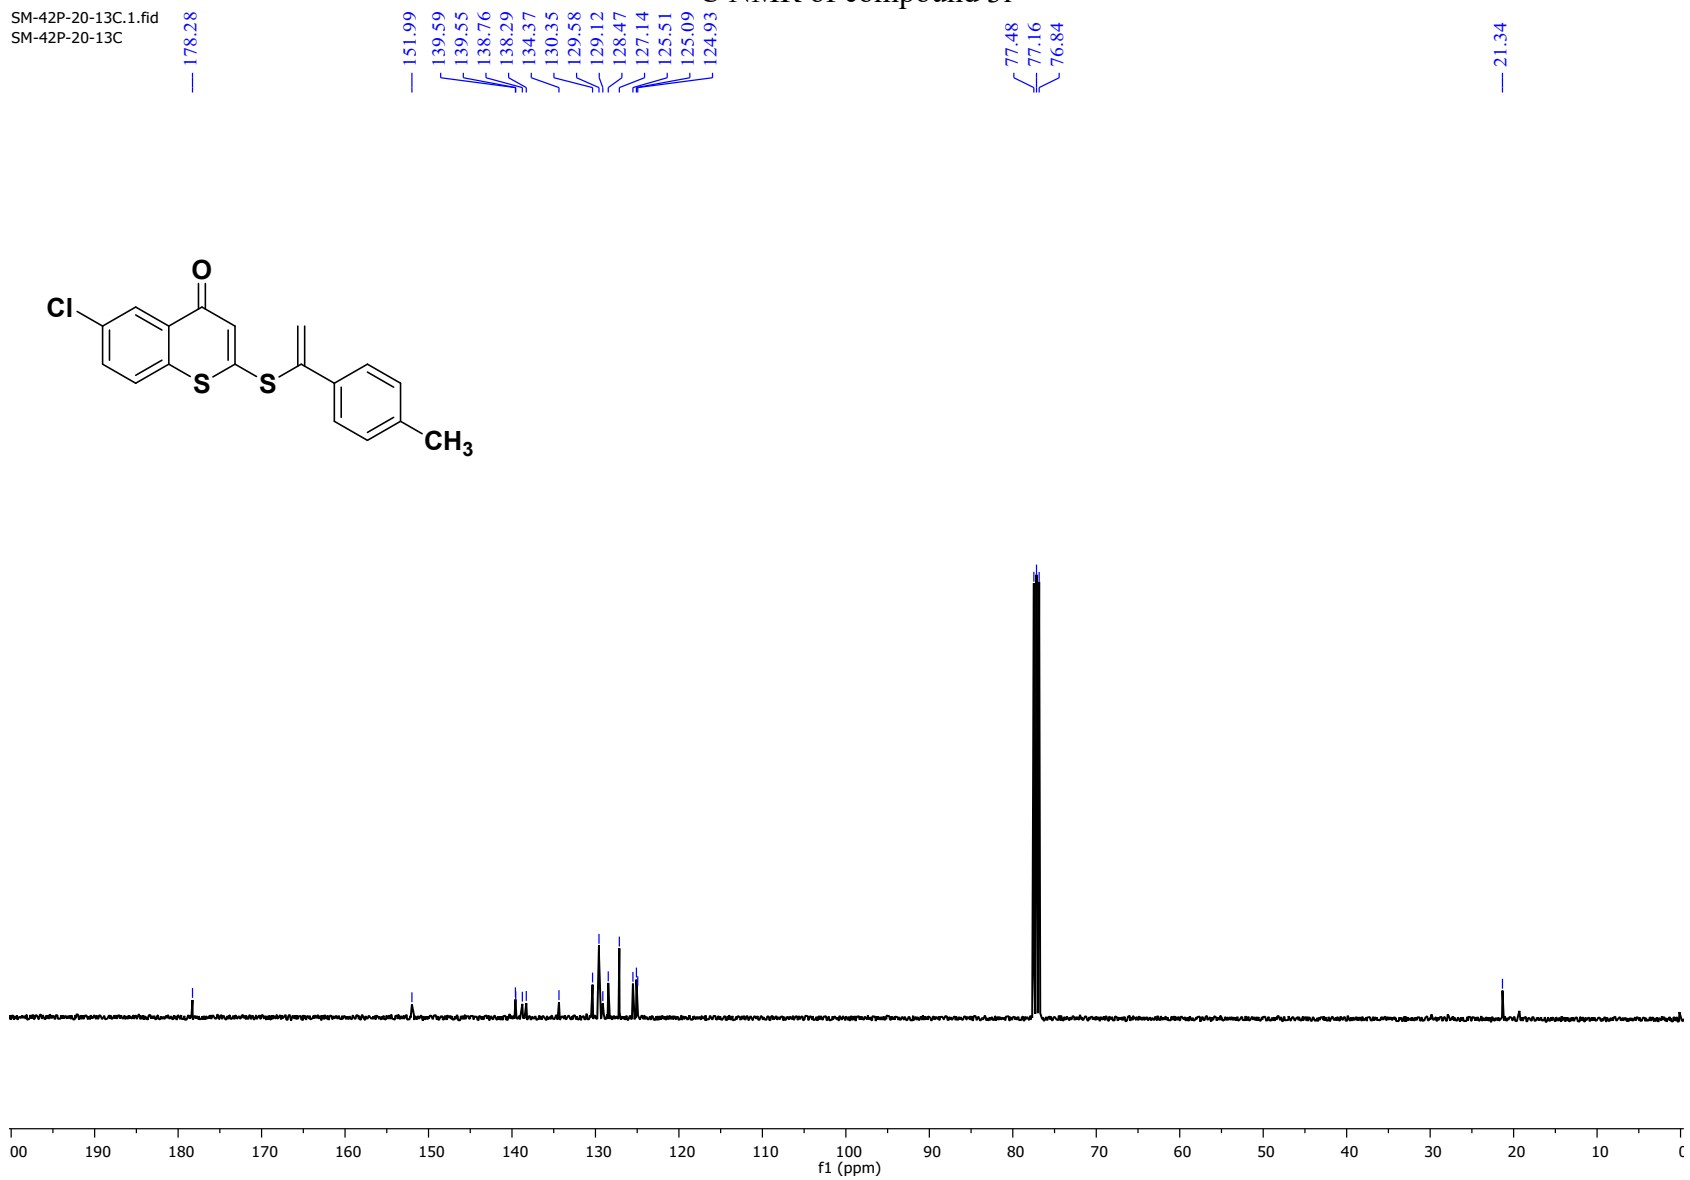

# HRMS of compound 31

|             |                    |                        |         |                 |                                   |
|-------------|--------------------|------------------------|---------|-----------------|-----------------------------------|
| Sample Name | SM-42-P-20         | Position               | P1-C5   | Instrument Name | Instrument 1                      |
| User Name   |                    | Inj Vol                | 20      | Inj Position    |                                   |
| Sample Type | Sample             | IRM Calibration Status | Success | Data Filename   | SM-42-P-20.d                      |
| ACQ Method  | ESI ALS 100-1000.m | Comment                |         | Acquired Time   | 17-Feb-21 03:18:06 PM (UTC+05:30) |

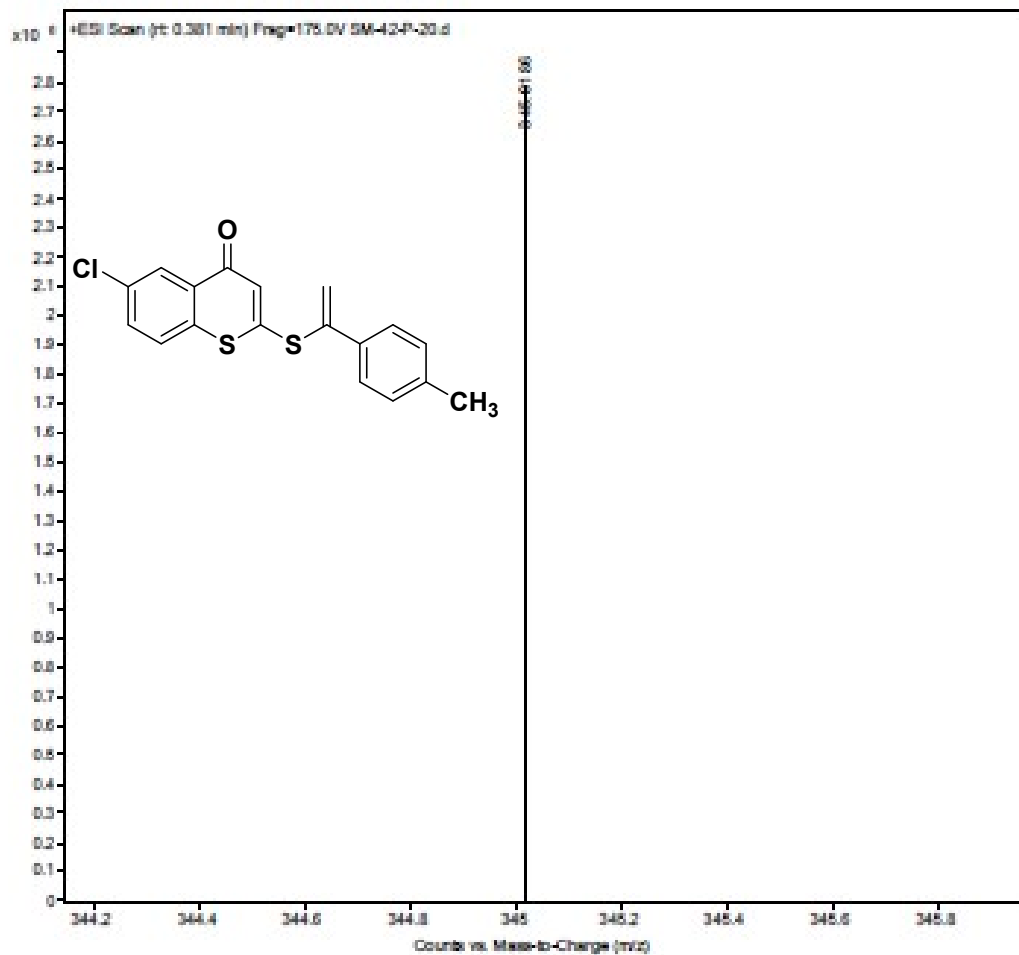

<sup>1</sup>H NMR of compound 3m

SM-42S-20-1H.1.fid  
SM-42S-20-1H

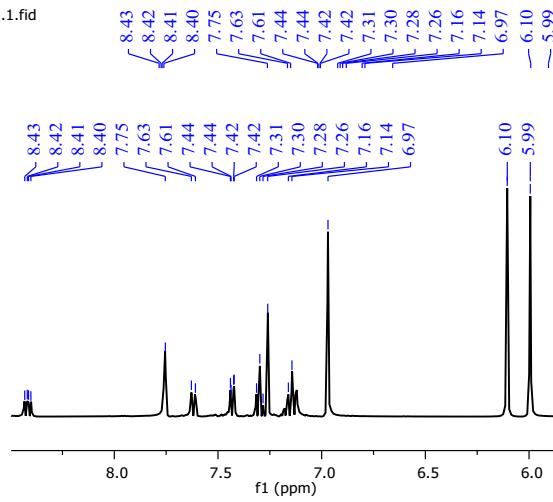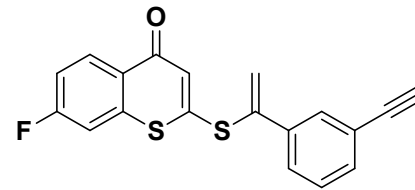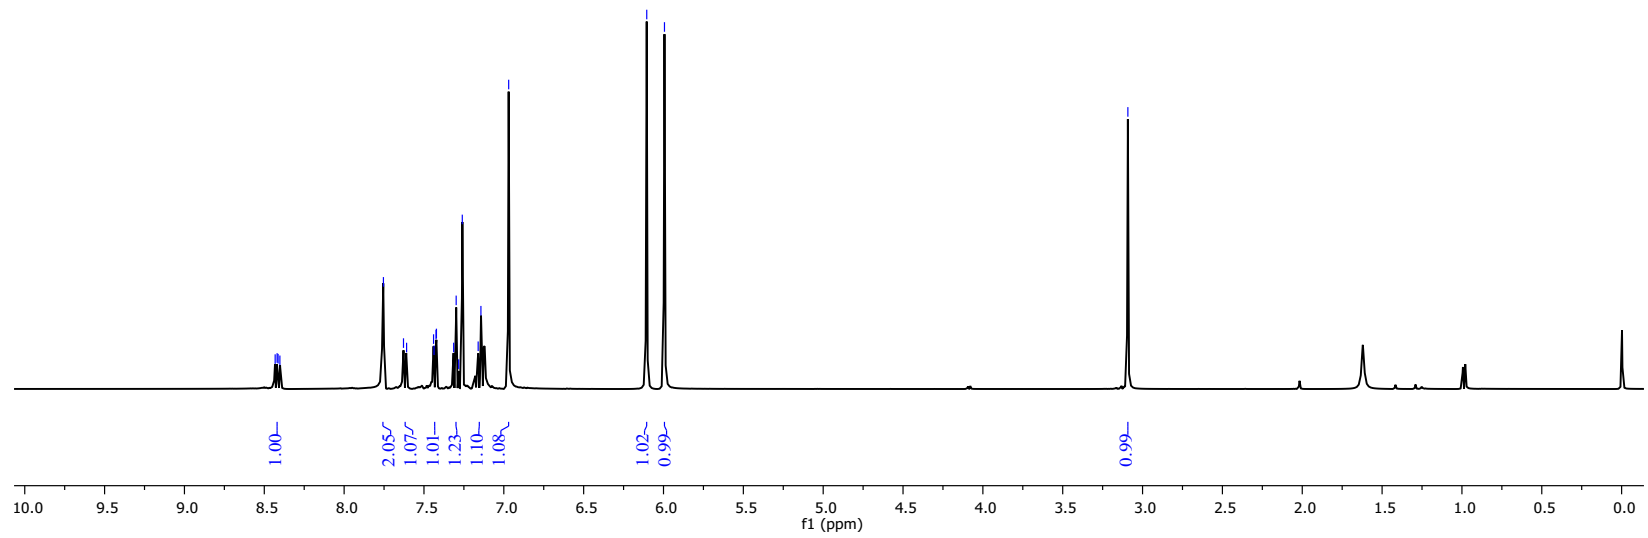

SM-42S-20-13C.1.fid  
SM-42S-20-13C

### <sup>13</sup>C NMR of compound 3m

178.14  
165.11  
163.07  
150.74  
140.23  
140.15  
138.21  
137.61  
132.99  
131.90  
131.82  
130.78  
128.93  
127.65  
126.39  
126.01  
122.90  
116.53  
116.36  
111.91  
111.71  
83.08  
78.15  
77.41  
77.16  
76.91

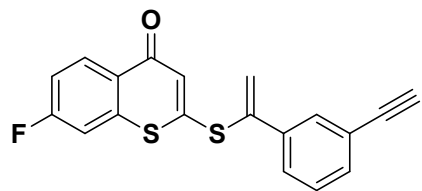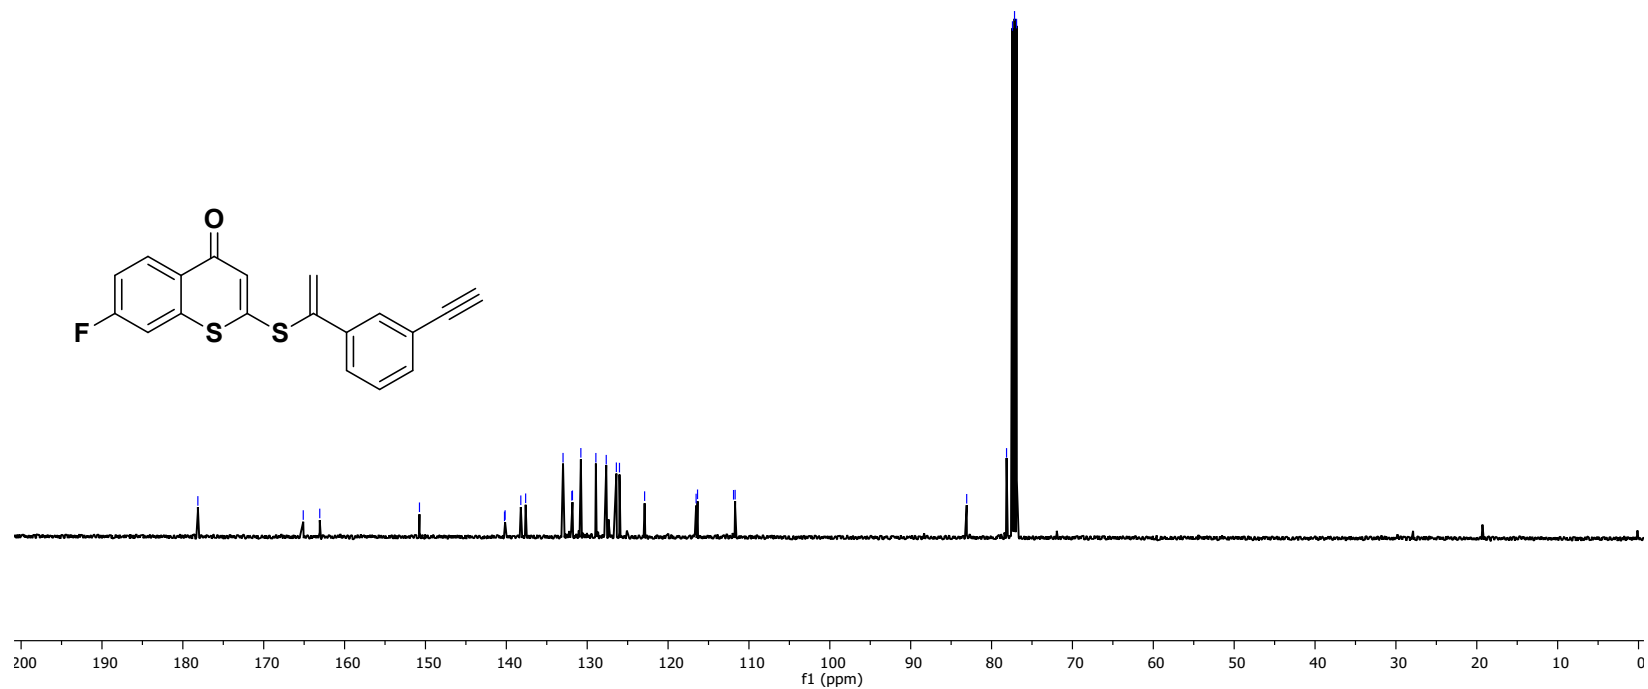



# HRMS of compound 3m

|               |                 |             |                    |                 |              |                        |                     |
|---------------|-----------------|-------------|--------------------|-----------------|--------------|------------------------|---------------------|
| Sample Name   | SAMPLE 14       | Position    | P2-B5              | Instrument Name | Instrument 1 | User Name              |                     |
| Inj Vol       | 20              | InjPosition |                    | SampleType      | Sample       | IRM Calibration Status | Success             |
| Data Filename | ATK-SM-42S-20.d | ACQ Method  | ESI ALS 100-1000.m | Comment         |              | Acquired Time          | 2/1/2021 7:18:05 PM |

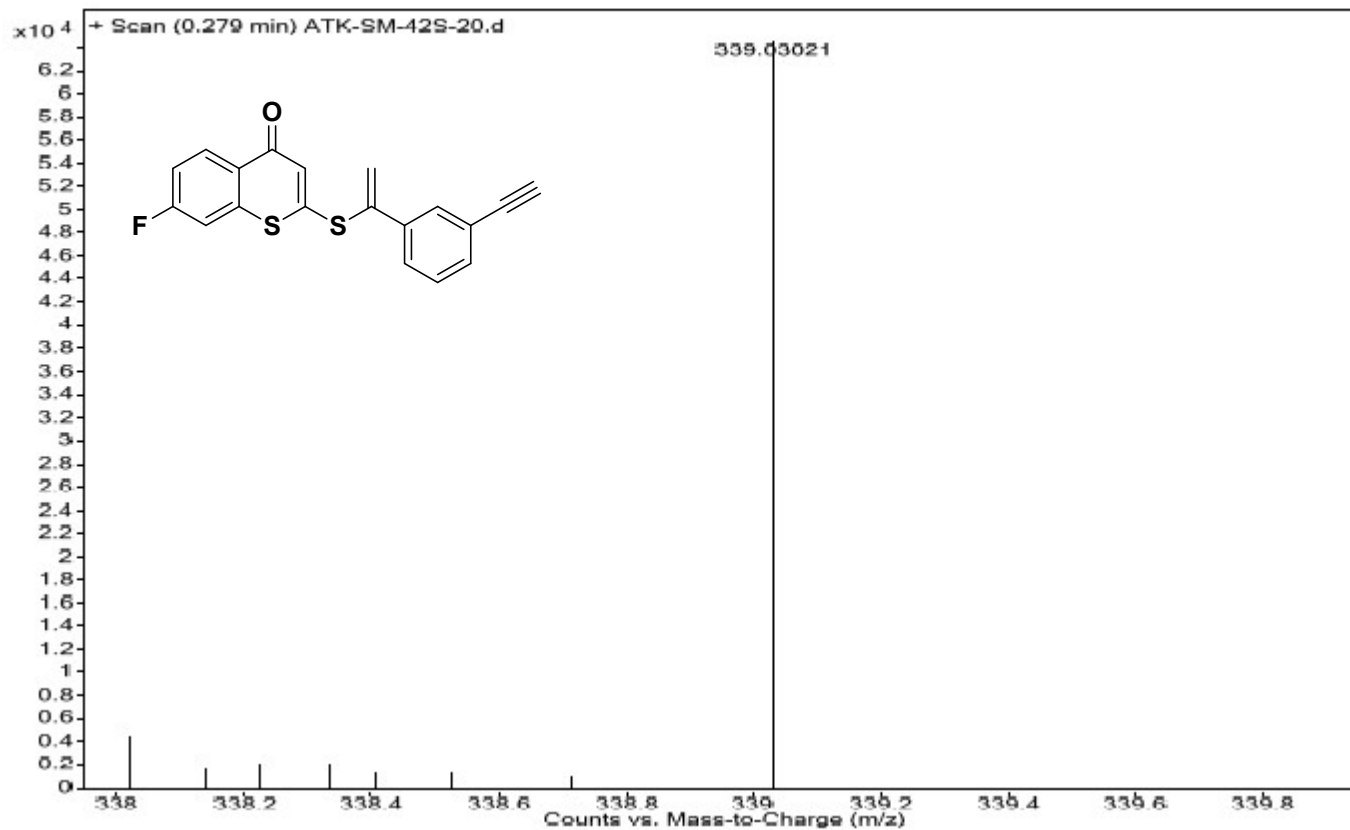

# <sup>1</sup>H NMR of compound 5a

SM-42LI-20-1H.2.fid  
SM-42LI-20-1H

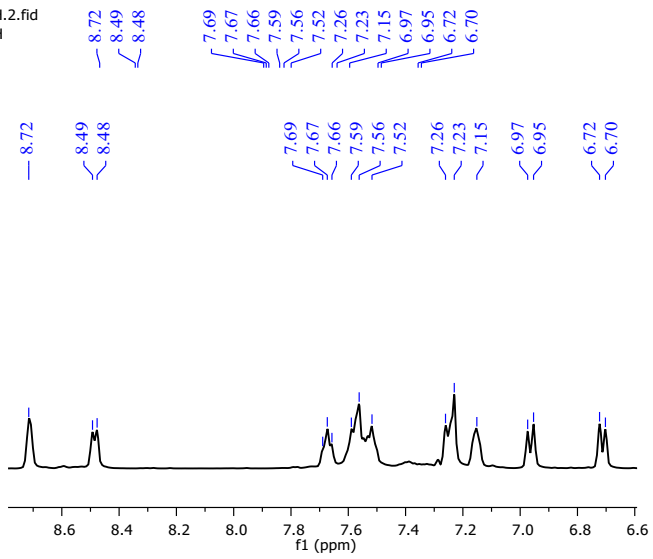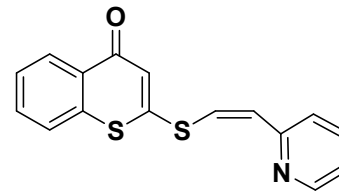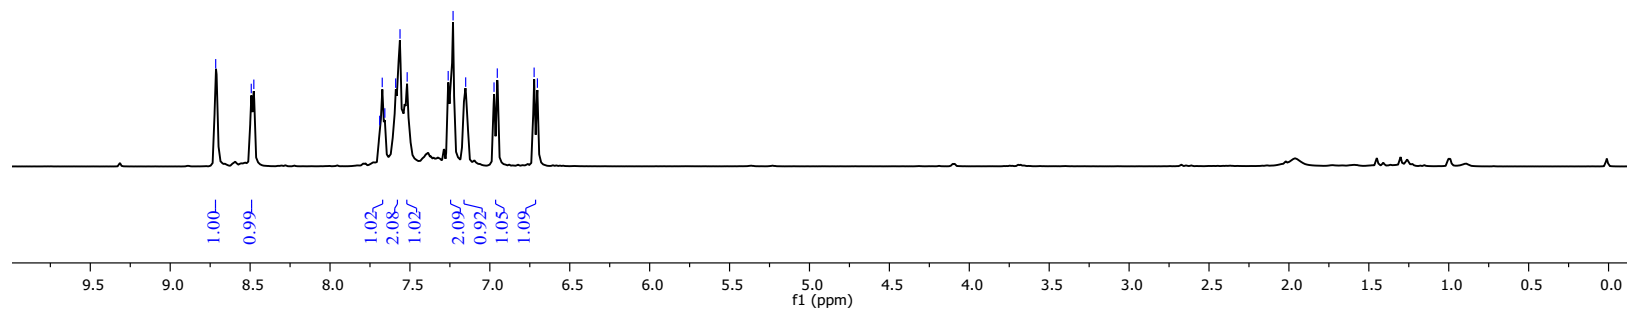

# <sup>13</sup>C NMR of compound 5a

SM-42-LI-20-13C.1.fid  
SM-42-LI-20-13C

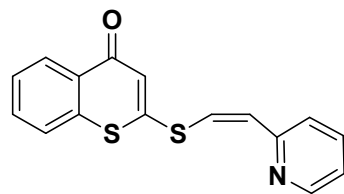

179.35  
154.51  
154.06  
148.47  
138.12  
136.46  
131.70  
130.91  
128.78  
127.99  
127.33  
126.49  
125.88  
125.32  
123.85  
121.56

77.41  
77.16  
76.91

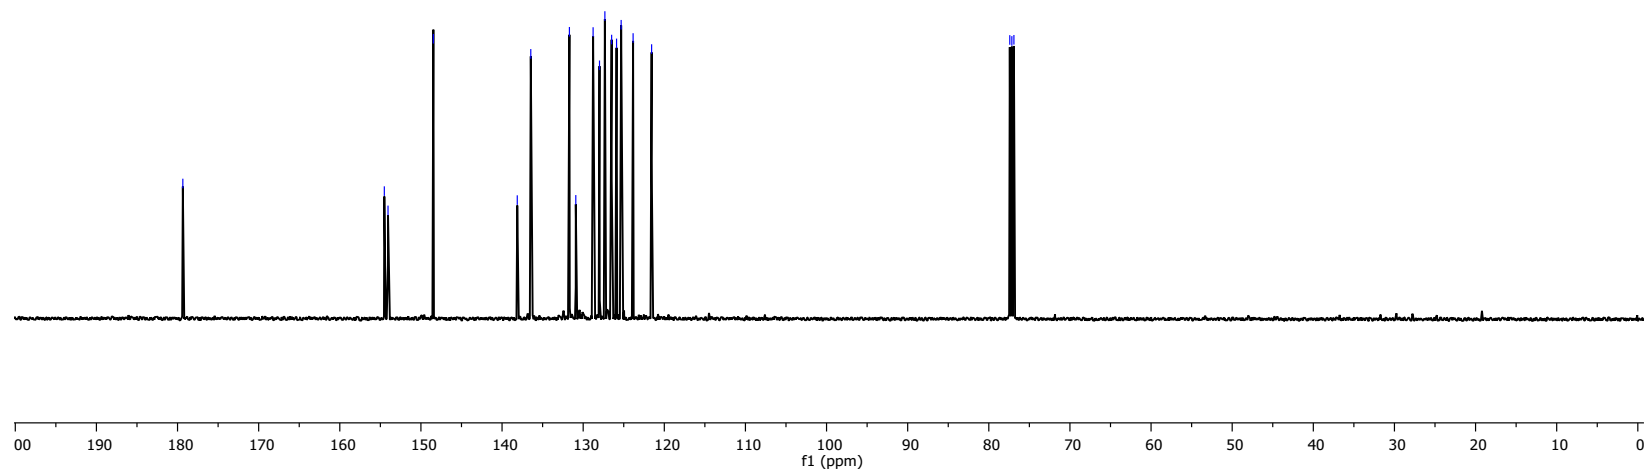

# HRMS of compound 5a

|               |                  |             |                    |                 |              |                        |                     |
|---------------|------------------|-------------|--------------------|-----------------|--------------|------------------------|---------------------|
| Sample Name   | SAMPLE 13        | Position    | P2-B4              | Instrument Name | Instrument 1 | User Name              |                     |
| Inj Vol       | 20               | InjPosition |                    | SampleType      | Sample       | IRM Calibration Status | Success             |
| Data Filename | ATK-SM-42L1-20.d | ACQ Method  | ESI ALS 100-1000.m | Comment         |              | Acquired Time          | 2/1/2021 7:07:00 PM |

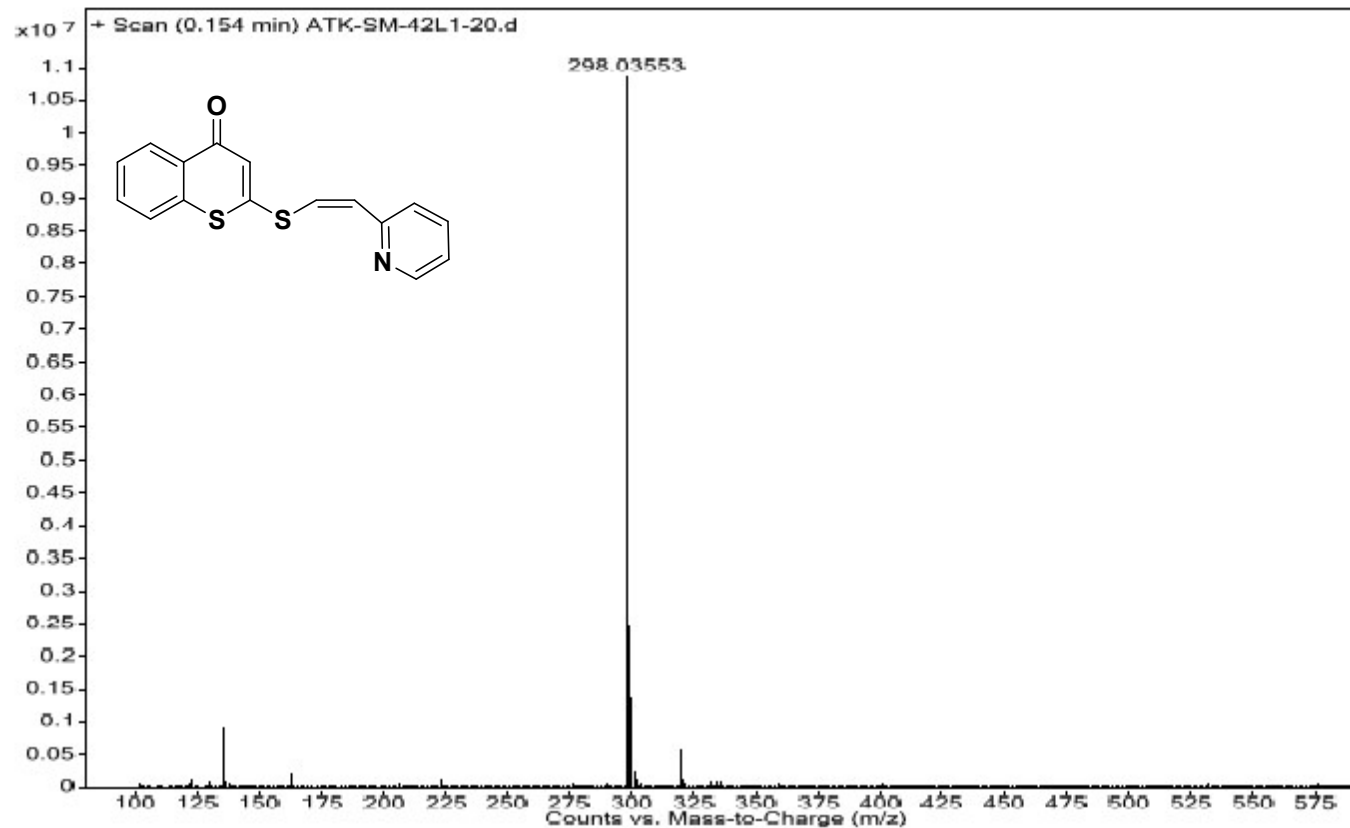

# <sup>1</sup>H NMR of compound 5b

SM-42L2-20-1H.1.fid  
SM-42L2-20-1H

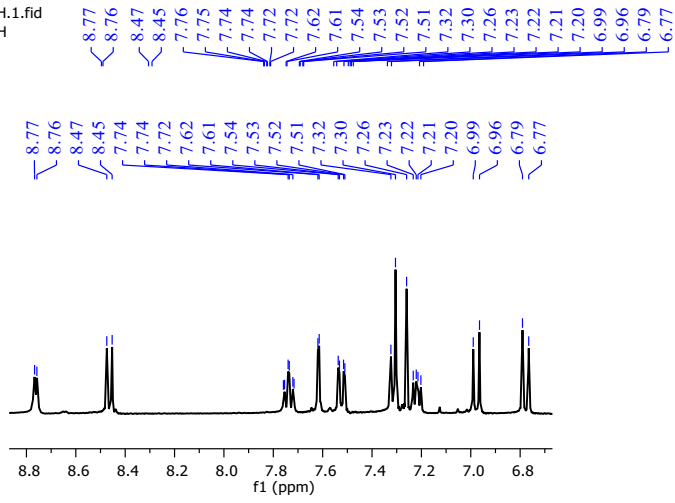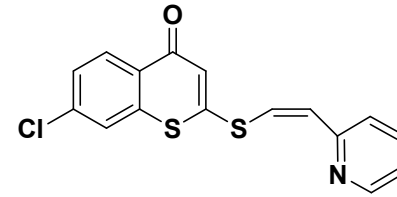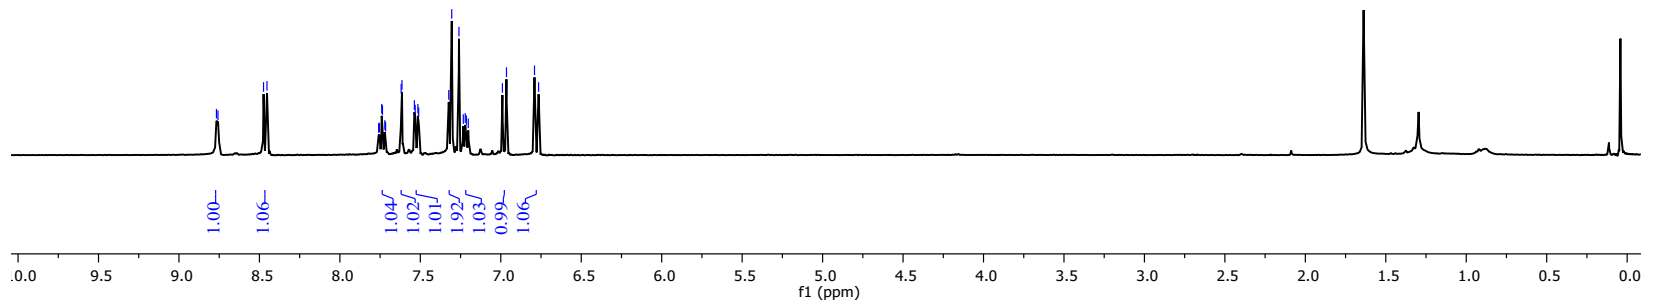

SM-42L2-20-13C.1.fid  
SM-42L2-20-13C

### <sup>13</sup>C NMR of compound 5b

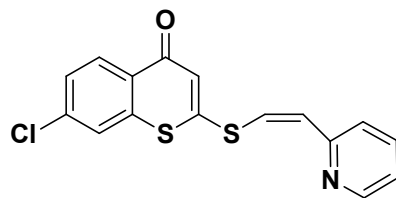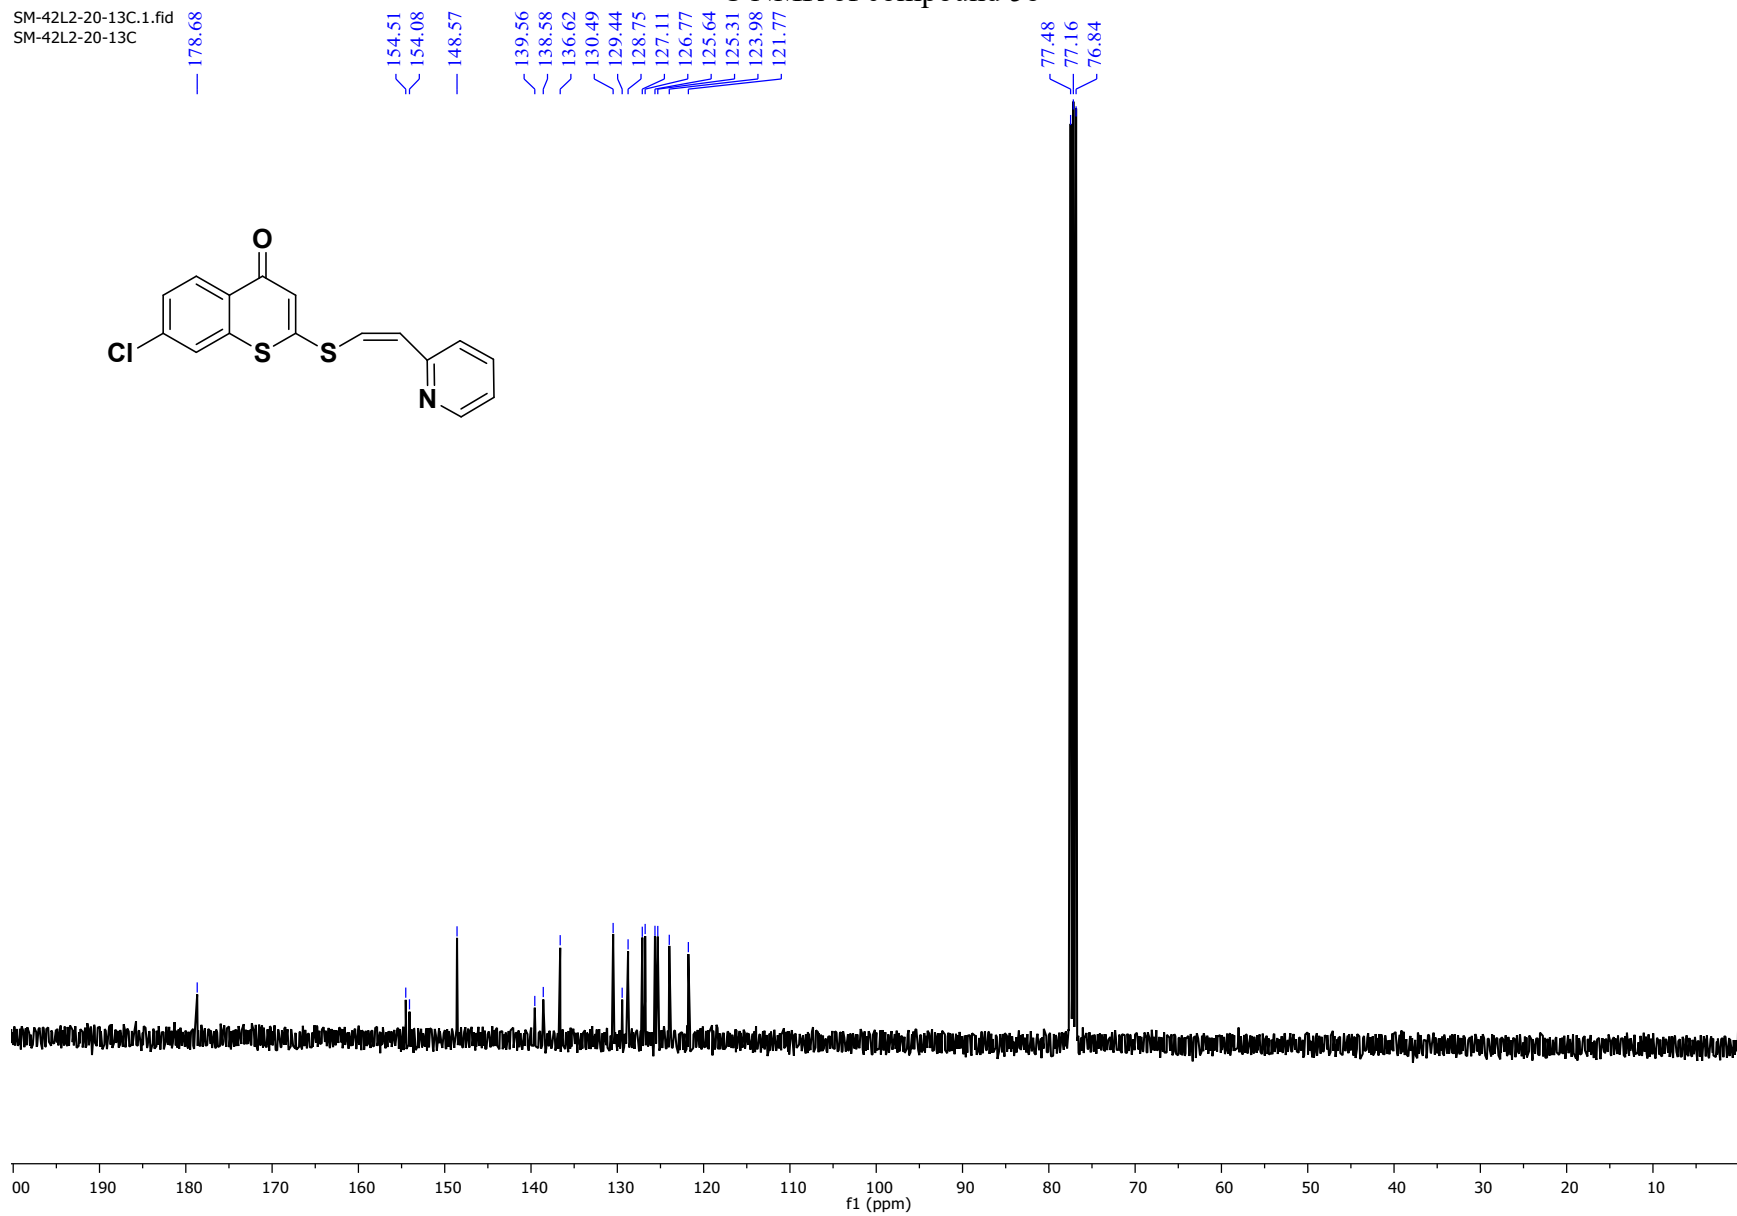

# HRMS of compound 5b

|               |               |             |                   |                 |              |                        |                       |
|---------------|---------------|-------------|-------------------|-----------------|--------------|------------------------|-----------------------|
| Sample Name   | SAMPLE        | Position    | P1-B11            | Instrument Name | Instrument 1 | User Name              |                       |
| Inj Vol       | 20            | InjPosition |                   | SampleType      | Sample       | IRM Calibration Status | Success               |
| Data Filename | SM-42L2R-20.d | ACQ Method  | ESI ALS 100-500.m | Comment         |              | Acquired Time          | 2/25/2021 12:15:35 PM |

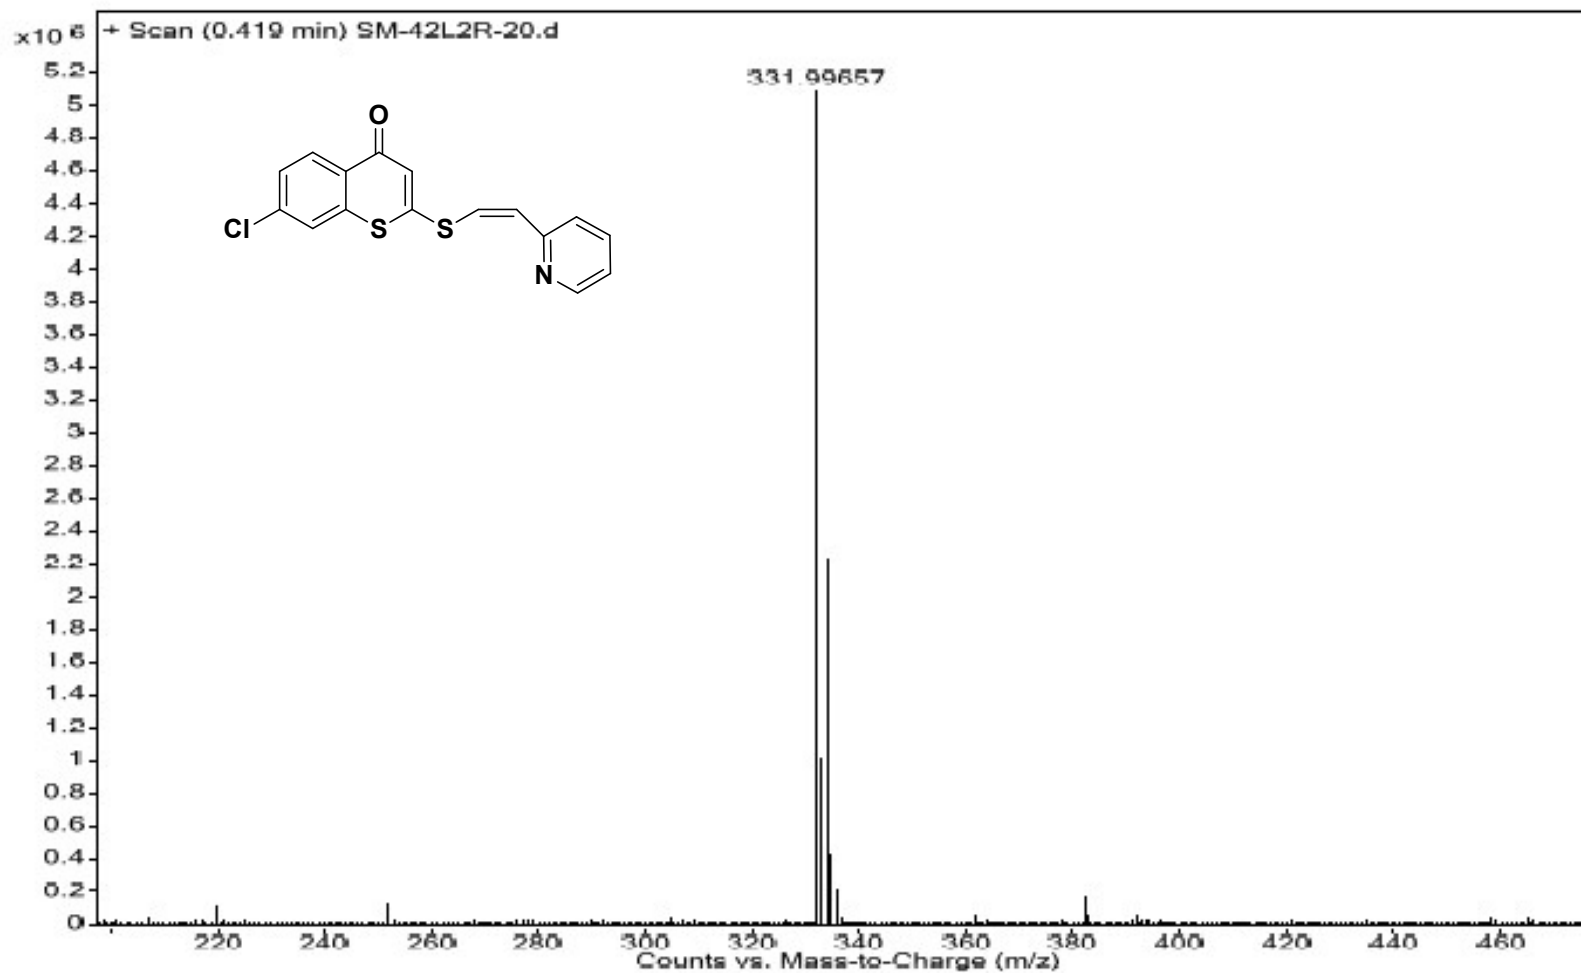

<sup>1</sup>H NMR of compound 5c

SM-42L3-20-1H.1.fid  
SM-42L3-20-1H

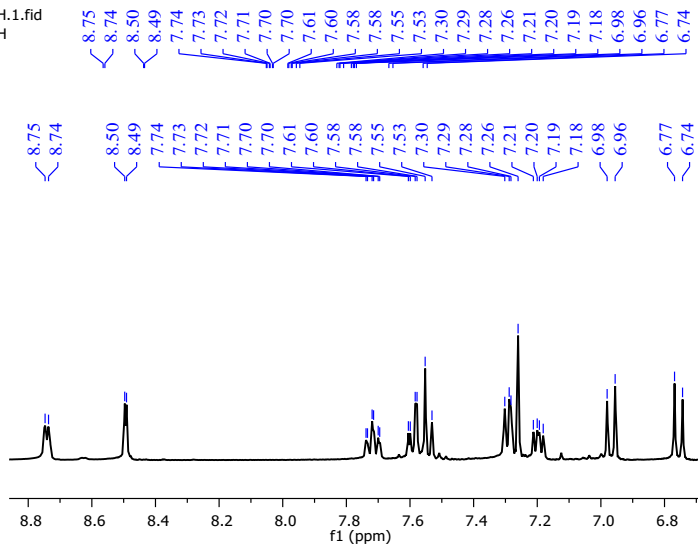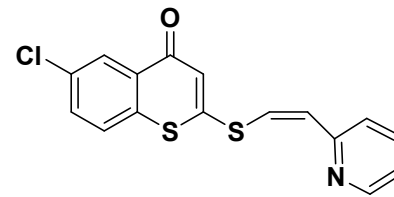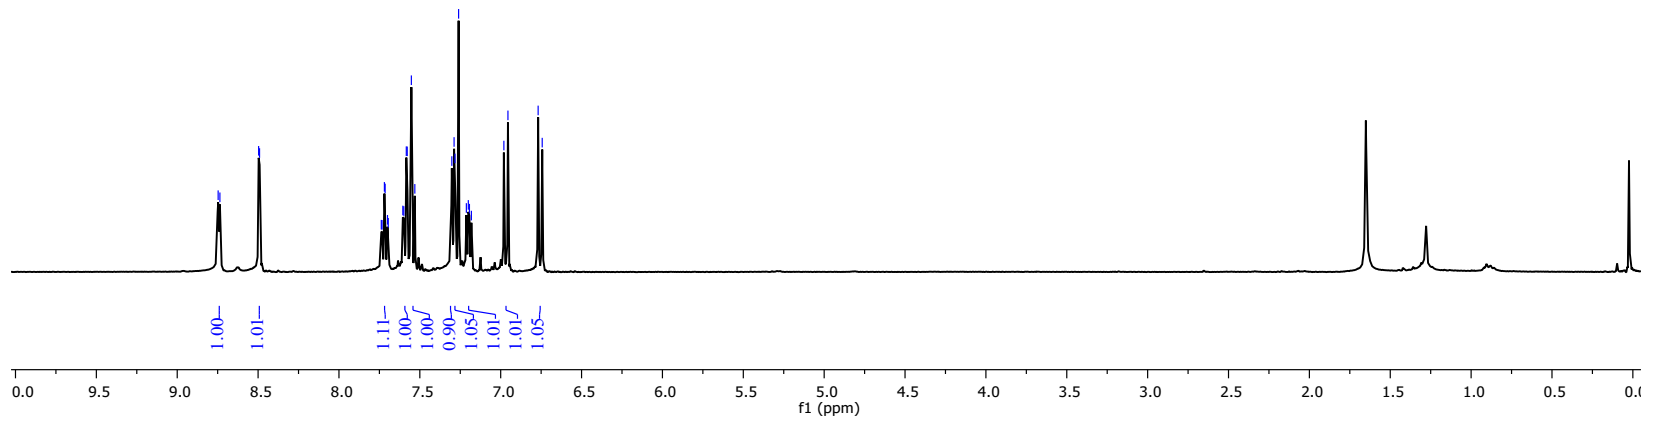



<sup>13</sup>C NMR of compound 5c

SM-42L3-20-13C.9.fid  
SM-42L3-20-13C

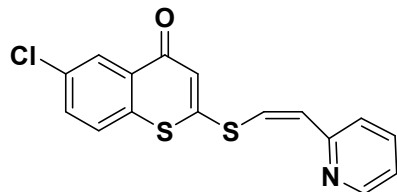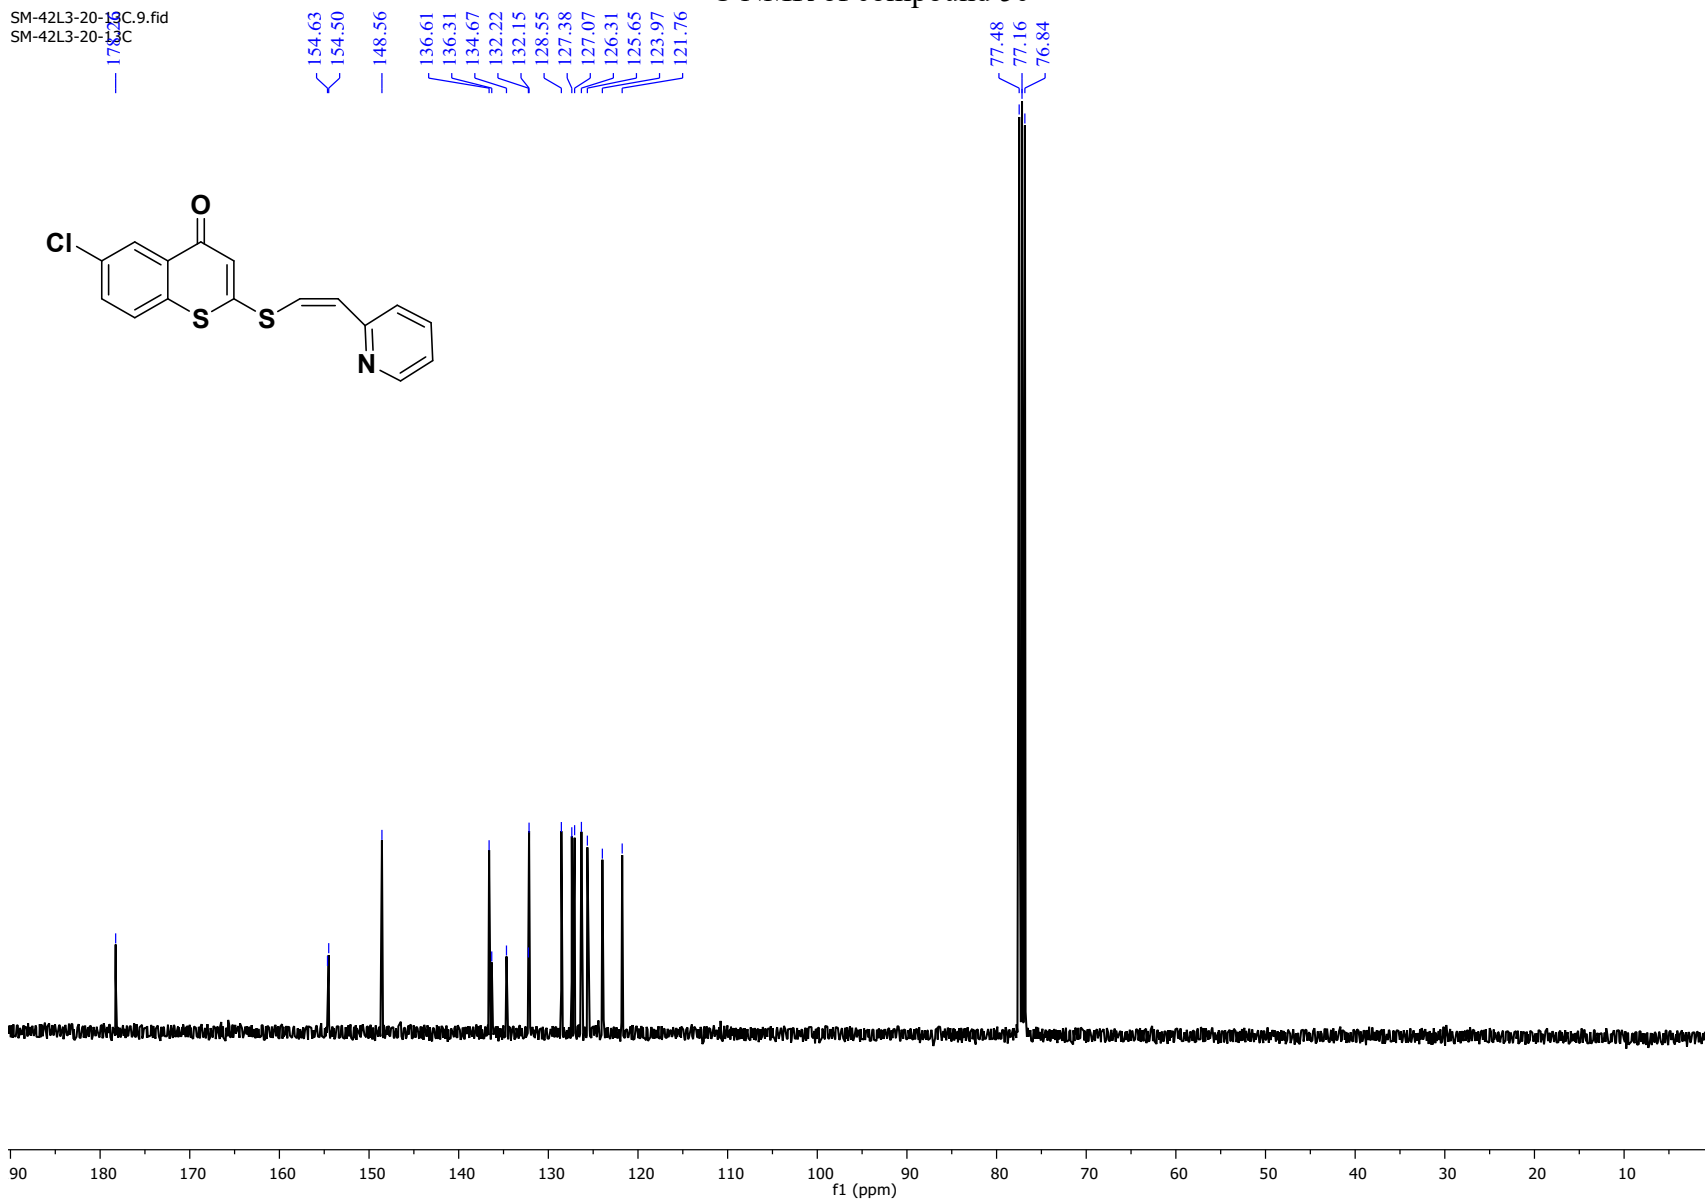

# HRMS of compound 5c

|               |               |             |                    |                 |              |                        |                       |
|---------------|---------------|-------------|--------------------|-----------------|--------------|------------------------|-----------------------|
| Sample Name   | SAMPLE        | Position    | P1-C2              | Instrument Name | Instrument 1 | User Name              |                       |
| Inj Vol       | 20            | InjPosition |                    | SampleType      | Sample       | IRM Calibration Status | Success               |
| Data Filename | SM-42L3R-20.d | ACQ Method  | ESI ALS 100-1000.m | Comment         |              | Acquired Time          | 2/25/2021 12:17:30 PM |

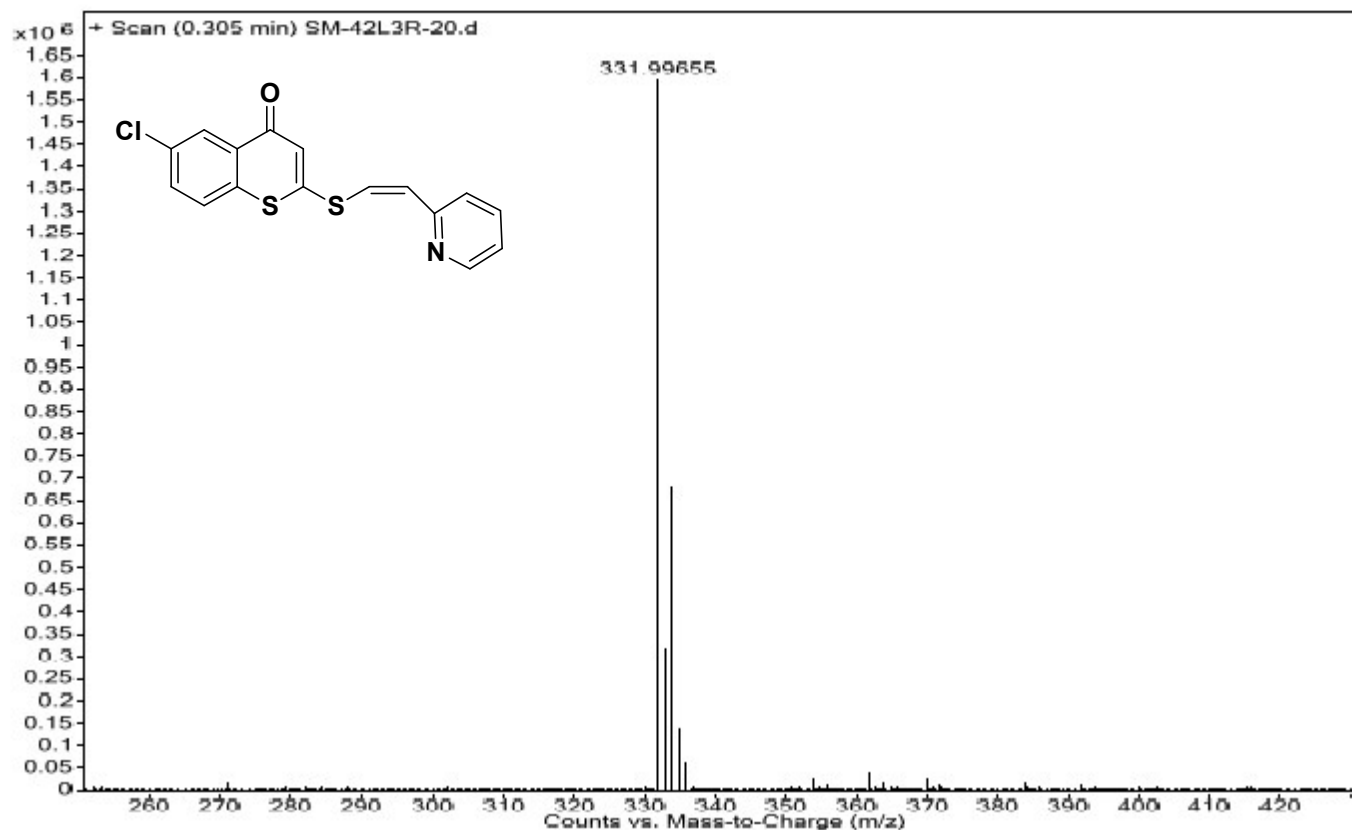

<sup>1</sup>H NMR of compound 5d

SM-42L6-20-1H.1.fid  
SM-42L6-20-1H

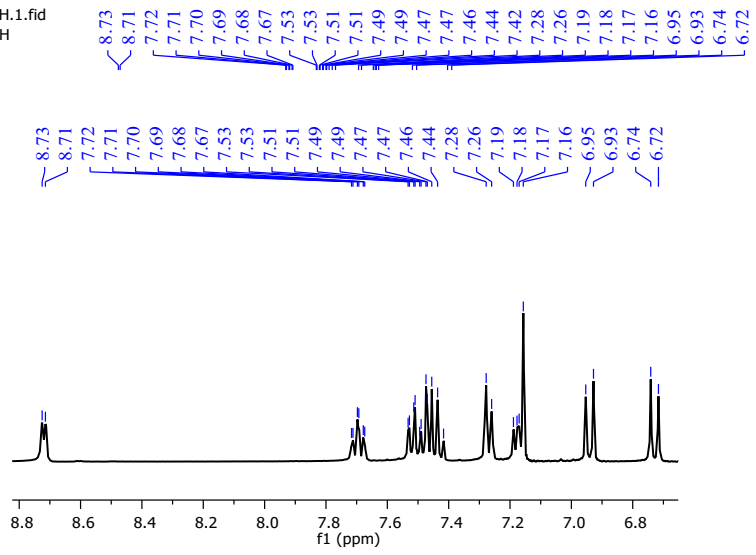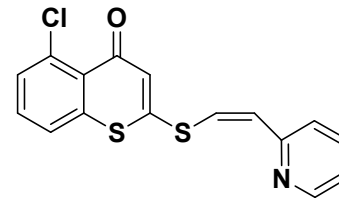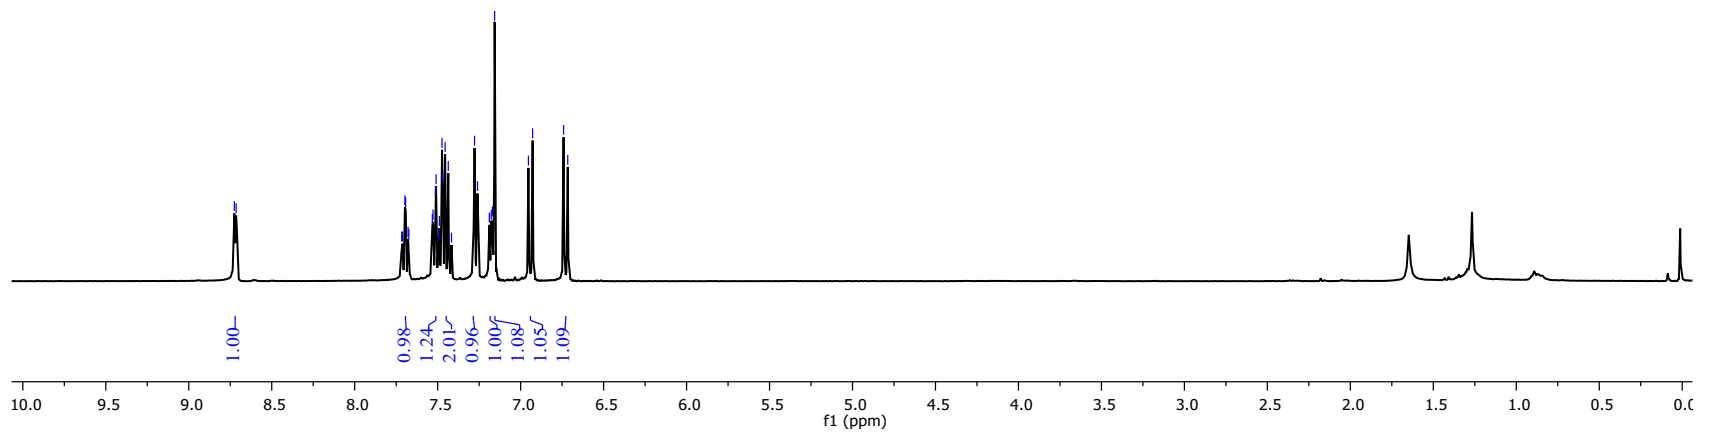

<sup>13</sup>C NMR of compound 5d

SM-42L6-2013C.1.fid  
SM-42L6-2013C

177.91  
154.56  
150.94  
148.54  
141.11  
136.57  
136.46  
131.82  
131.08  
127.95  
127.91  
127.20  
125.48  
125.03  
123.92  
121.69

77.48  
77.16  
76.84

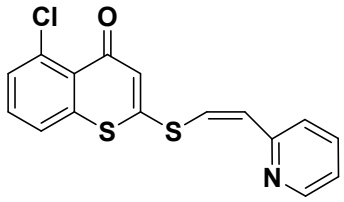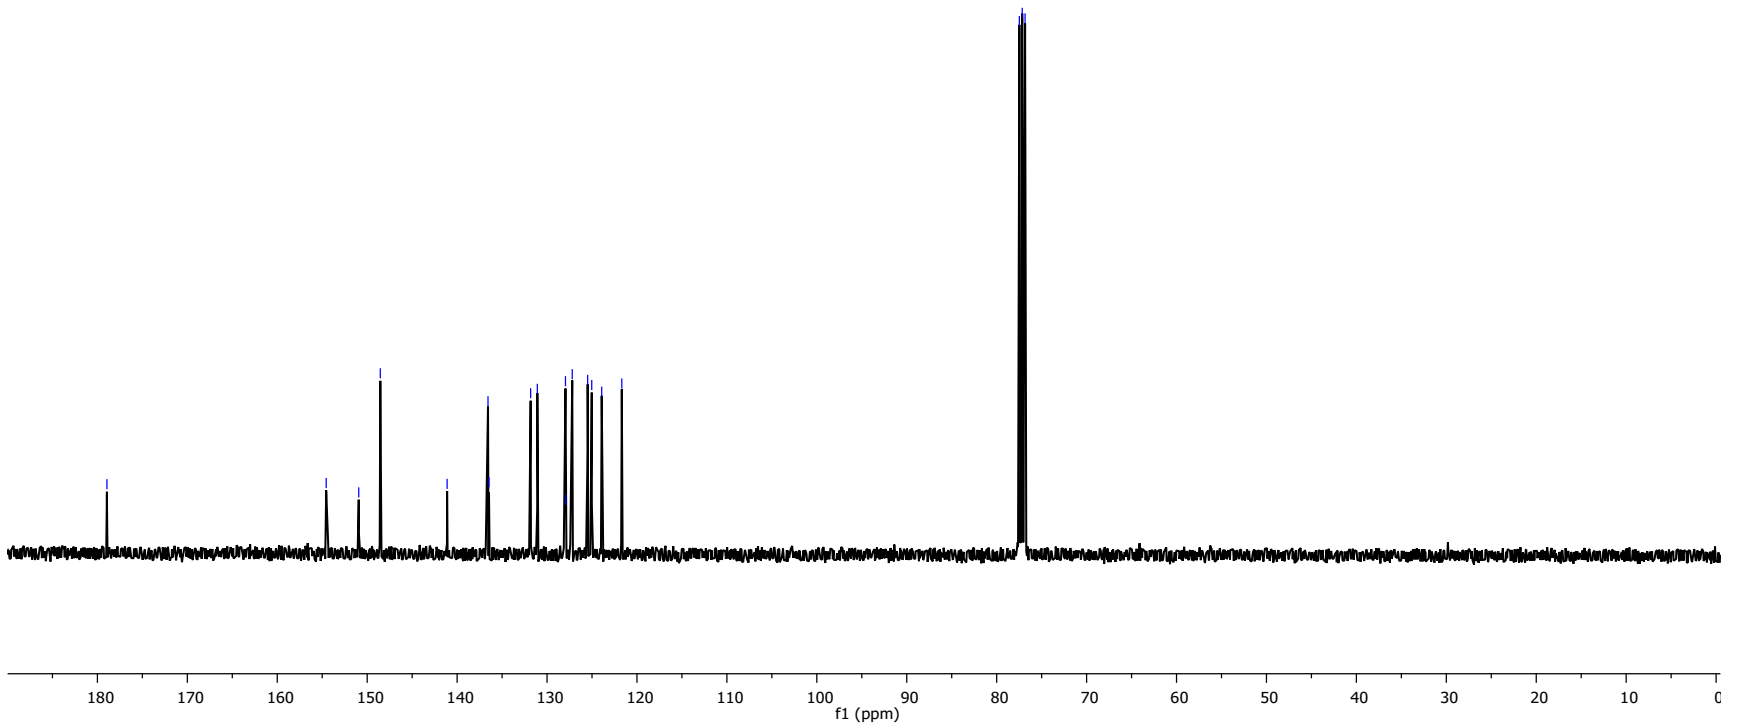

# HRMS of compound 5d

|               |               |             |                   |                 |              |                        |                       |
|---------------|---------------|-------------|-------------------|-----------------|--------------|------------------------|-----------------------|
| Sample Name   | SAMPLE        | Position    | P1-C5             | Instrument Name | Instrument 1 | User Name              |                       |
| Inj Vol       | 20            | InjPosition |                   | SampleType      | Sample       | IRM Calibration Status | Success               |
| Data Filename | SM-42L6R-20.d | ACQ Method  | ESI ALS 100-500.m | Comment         |              | Acquired Time          | 2/25/2021 12:23:15 PM |

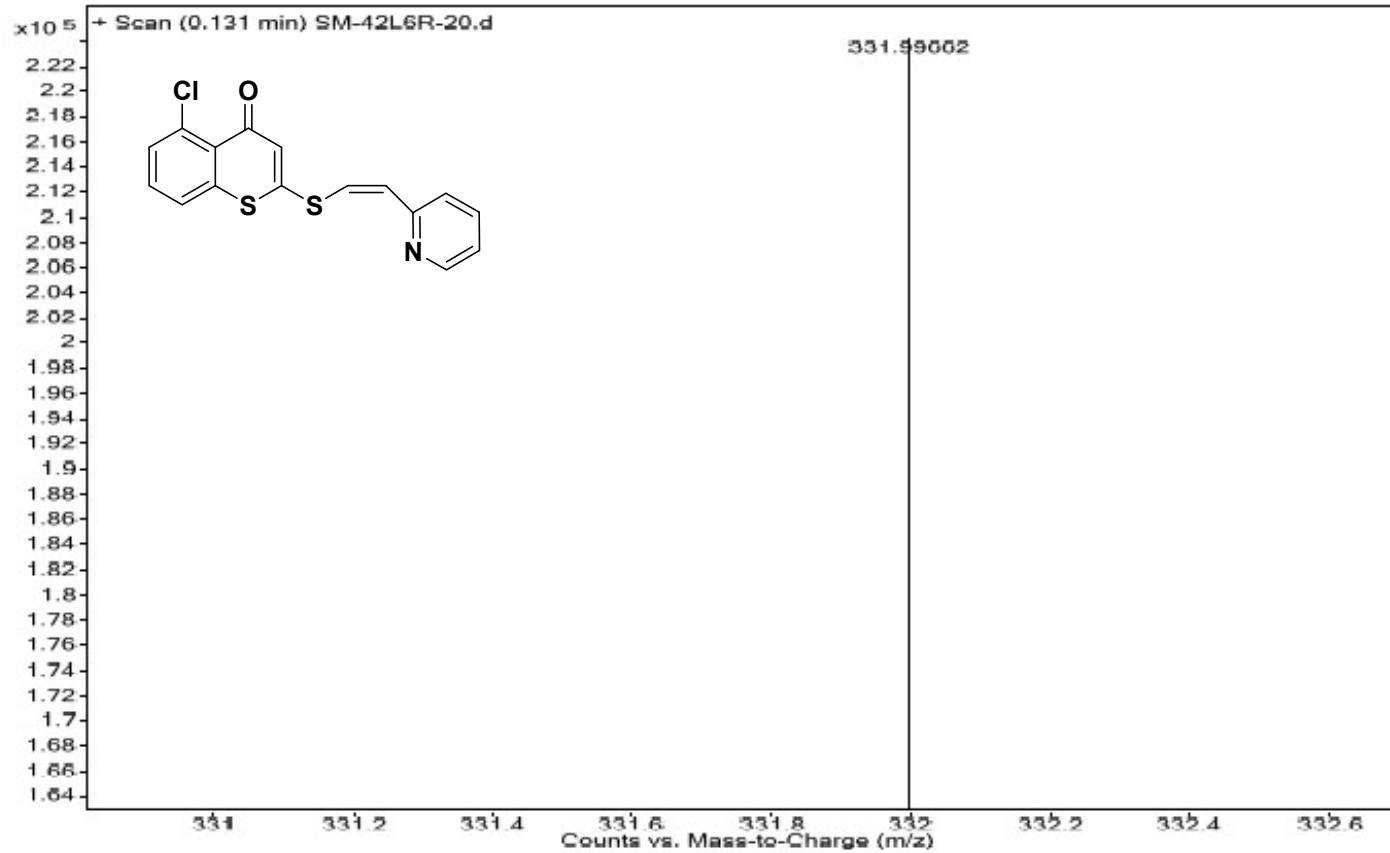

<sup>1</sup>H NMR of compound 5e

SM-42L4-1H.1.fid  
SM-42L4-1H

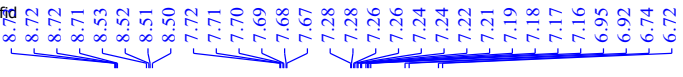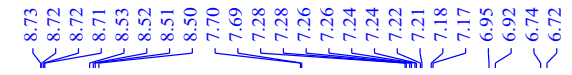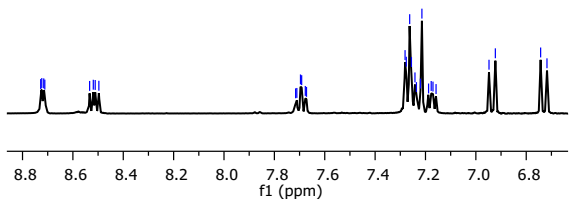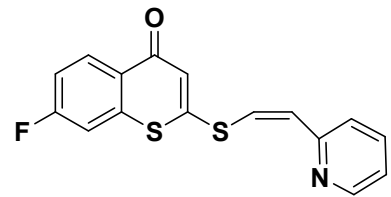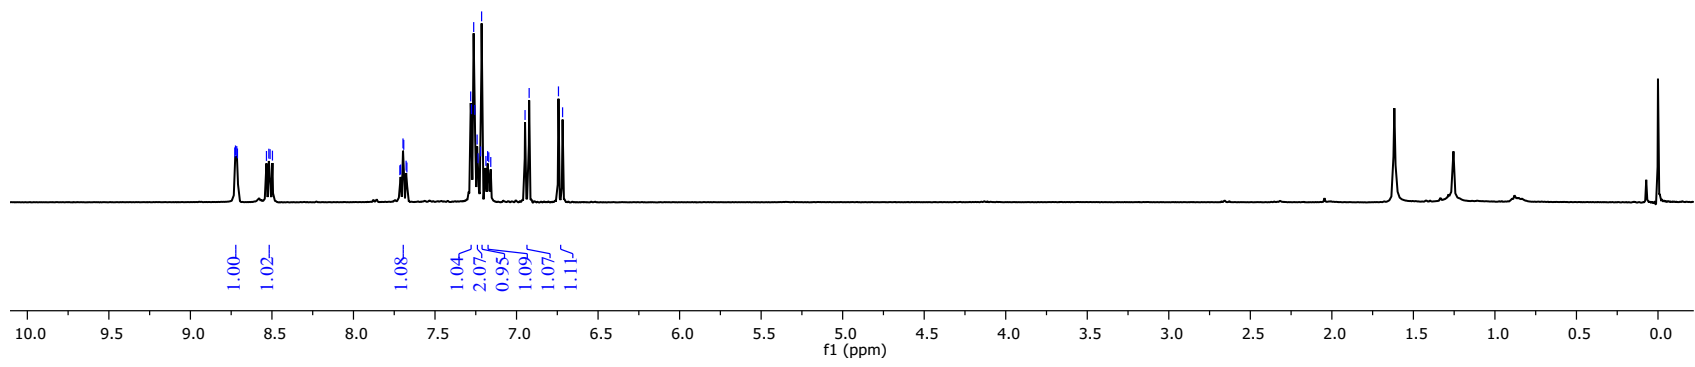

<sup>13</sup>C NMR of compound 5e

SM-42L4-20-13C.1.fid  
SM-42L4-20-13C

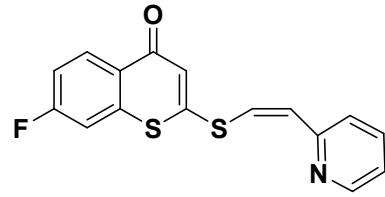

- 177.55
- 165.51
- 162.96
- 154.54
- 153.82
- 148.57
- 140.42
- 140.32
- 136.60
- 132.02
- 131.93
- 127.74
- 127.25
- 126.82
- 125.56
- 123.96
- 121.74
- 116.72
- 116.50
- 112.09
- 111.84
- 77.48
- 77.16
- 76.84

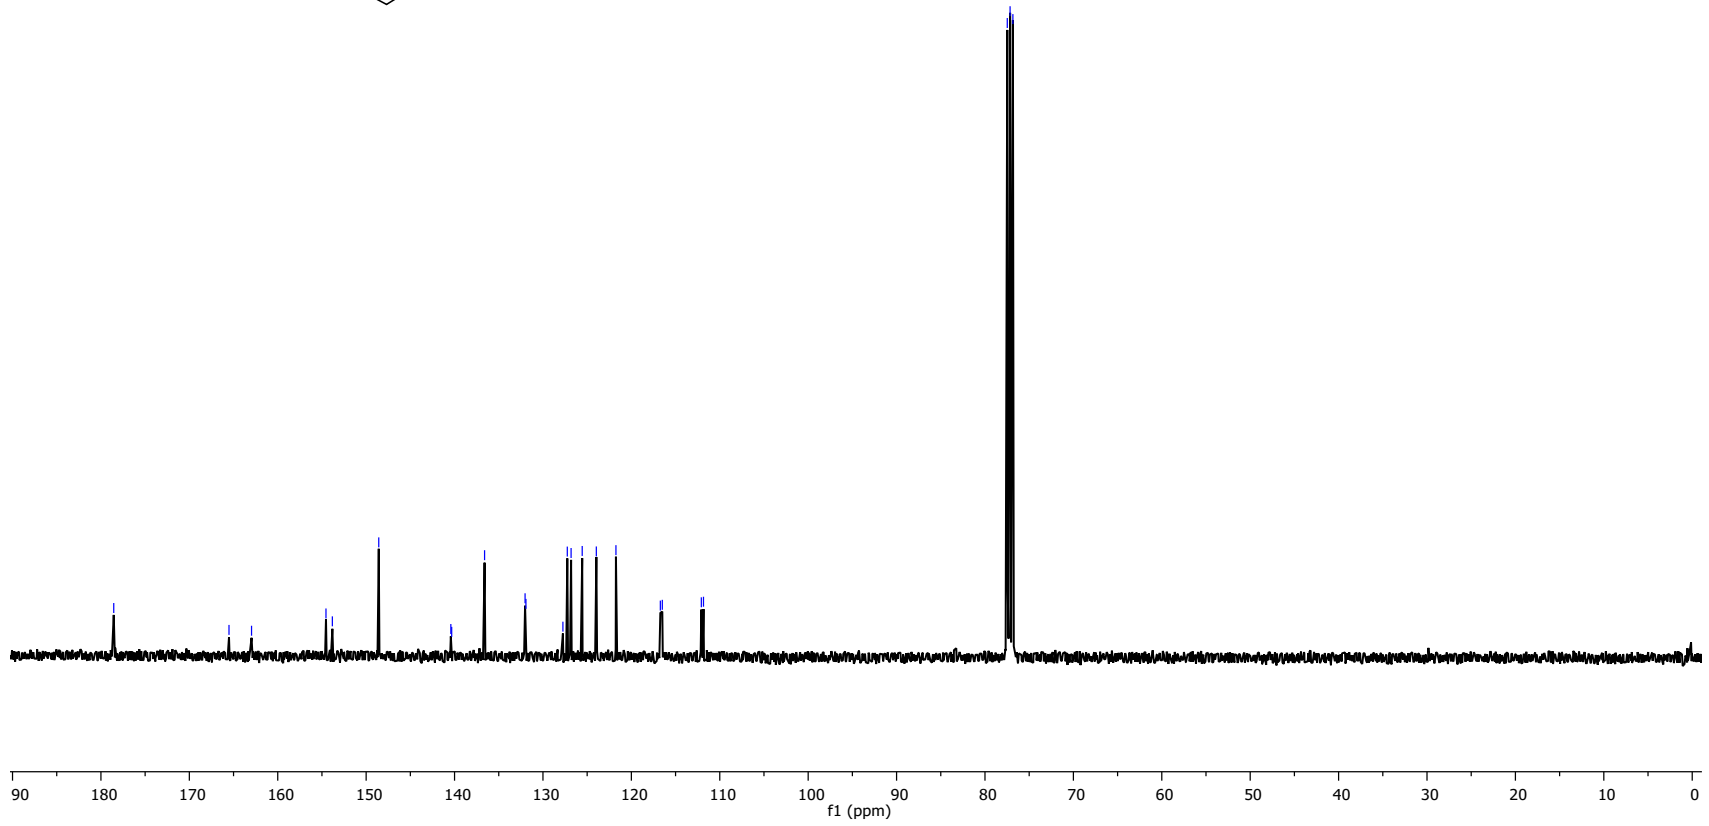

# HRMS of compound 5e

|               |               |             |                   |                 |              |                        |                       |
|---------------|---------------|-------------|-------------------|-----------------|--------------|------------------------|-----------------------|
| Sample Name   | SAMPLE        | Position    | P1-C3             | Instrument Name | Instrument 1 | User Name              |                       |
| Inj Vol       | 20            | InjPosition |                   | SampleType      | Sample       | IRM Calibration Status | Success               |
| Data Filename | SM-42L4R-20.d | ACQ Method  | ESI ALS 100-500.m | Comment         |              | Acquired Time          | 2/25/2021 12:19:30 PM |

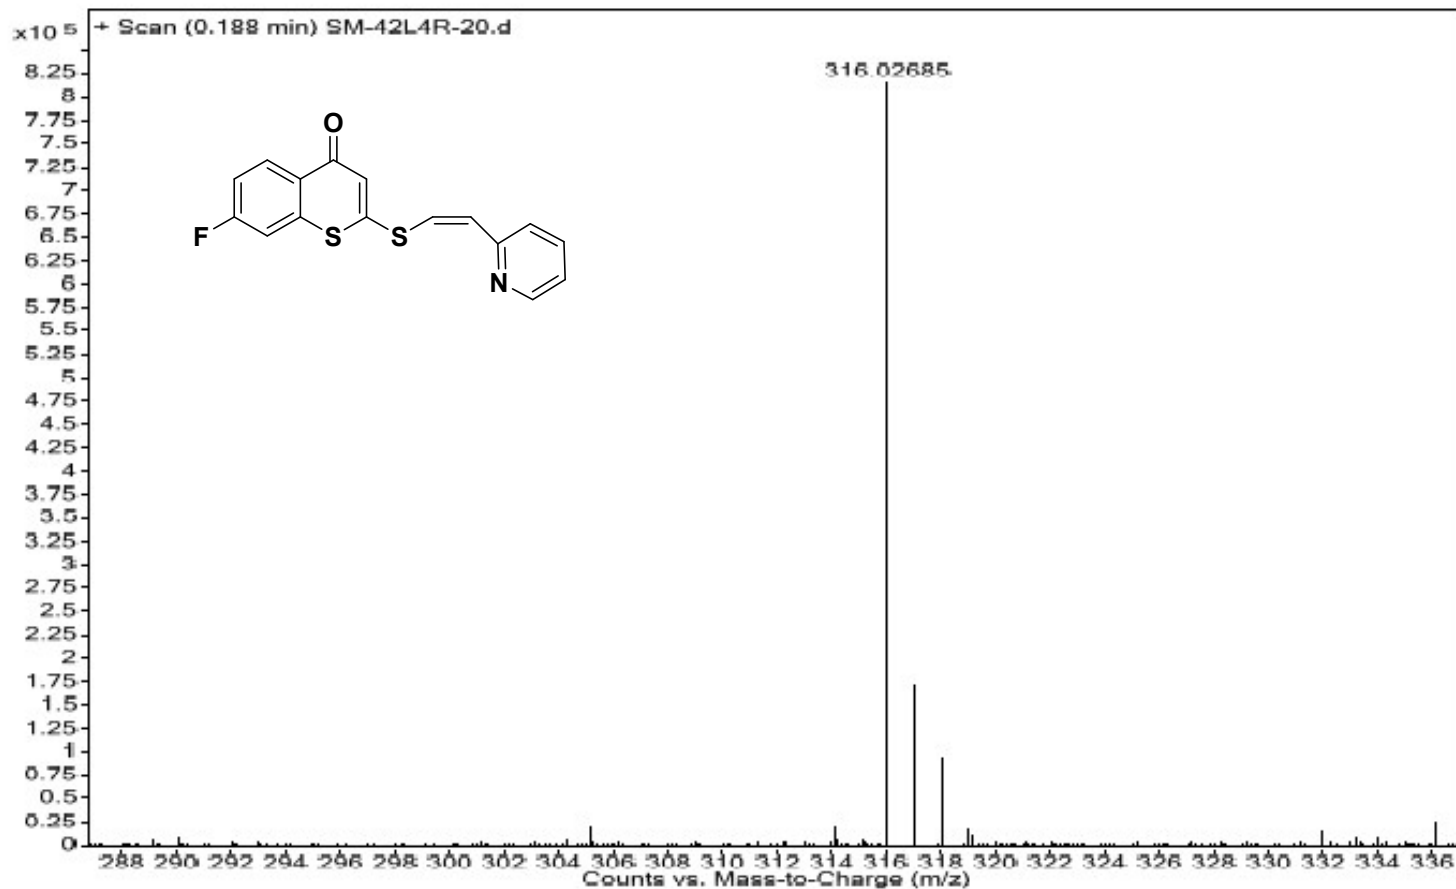



<sup>1</sup>H NMR of compound 5f

SM-42L5-20-1H.1.0d  
SM-42L5-20-1H

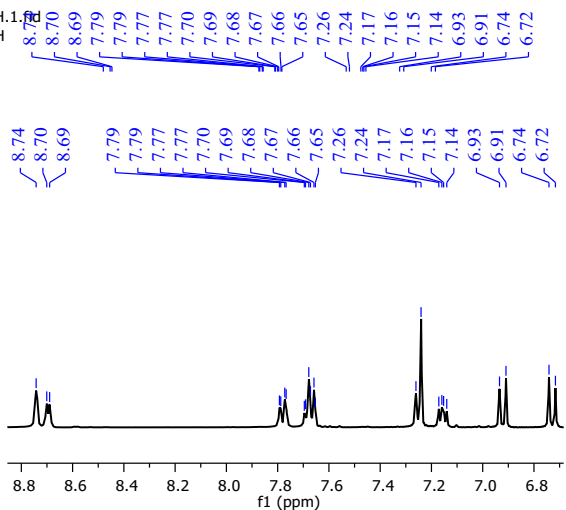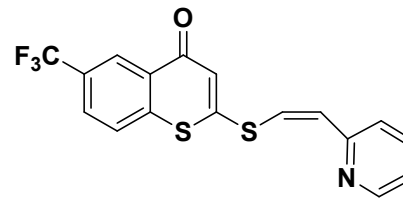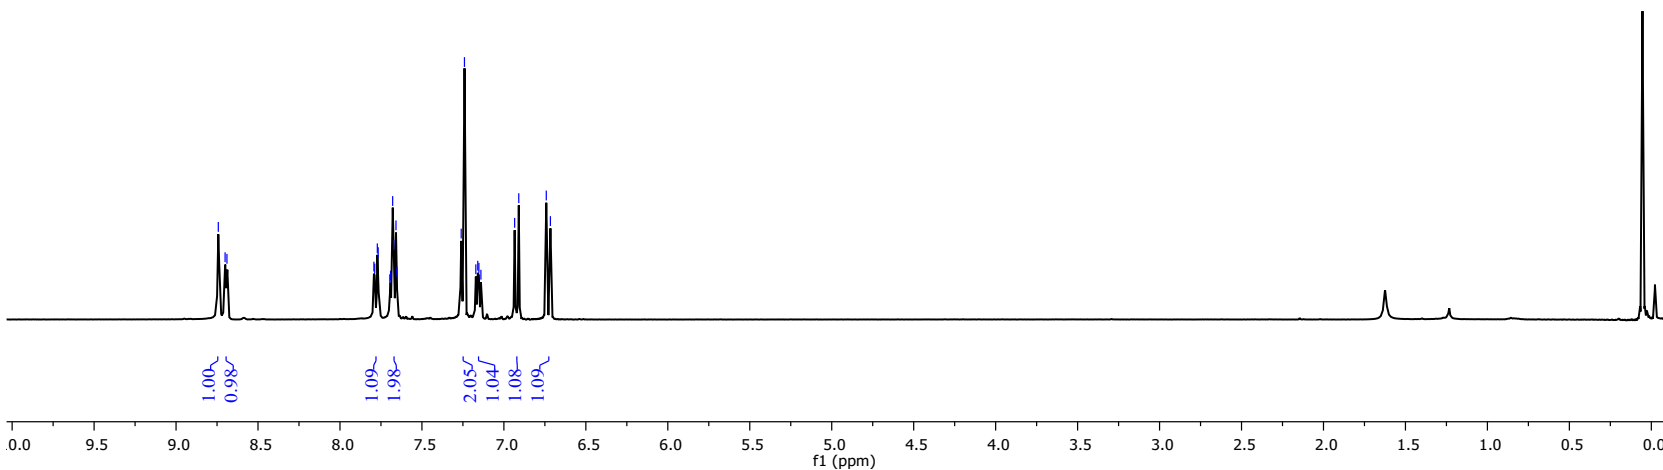

<sup>13</sup>C NMR of compound 5f

SM-42L5-20-13C.1.fid  
SM-42L5-20-13C

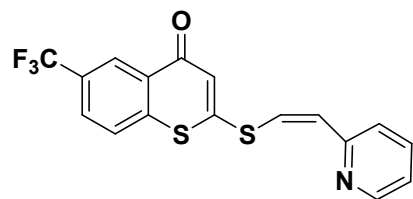

177.38  
153.71  
153.26  
147.40  
140.52  
135.49  
130.04  
129.45  
129.12  
126.65  
126.62  
125.72  
125.44  
125.34  
125.23  
125.19  
124.77  
122.86  
120.69  
76.33  
76.01  
75.69

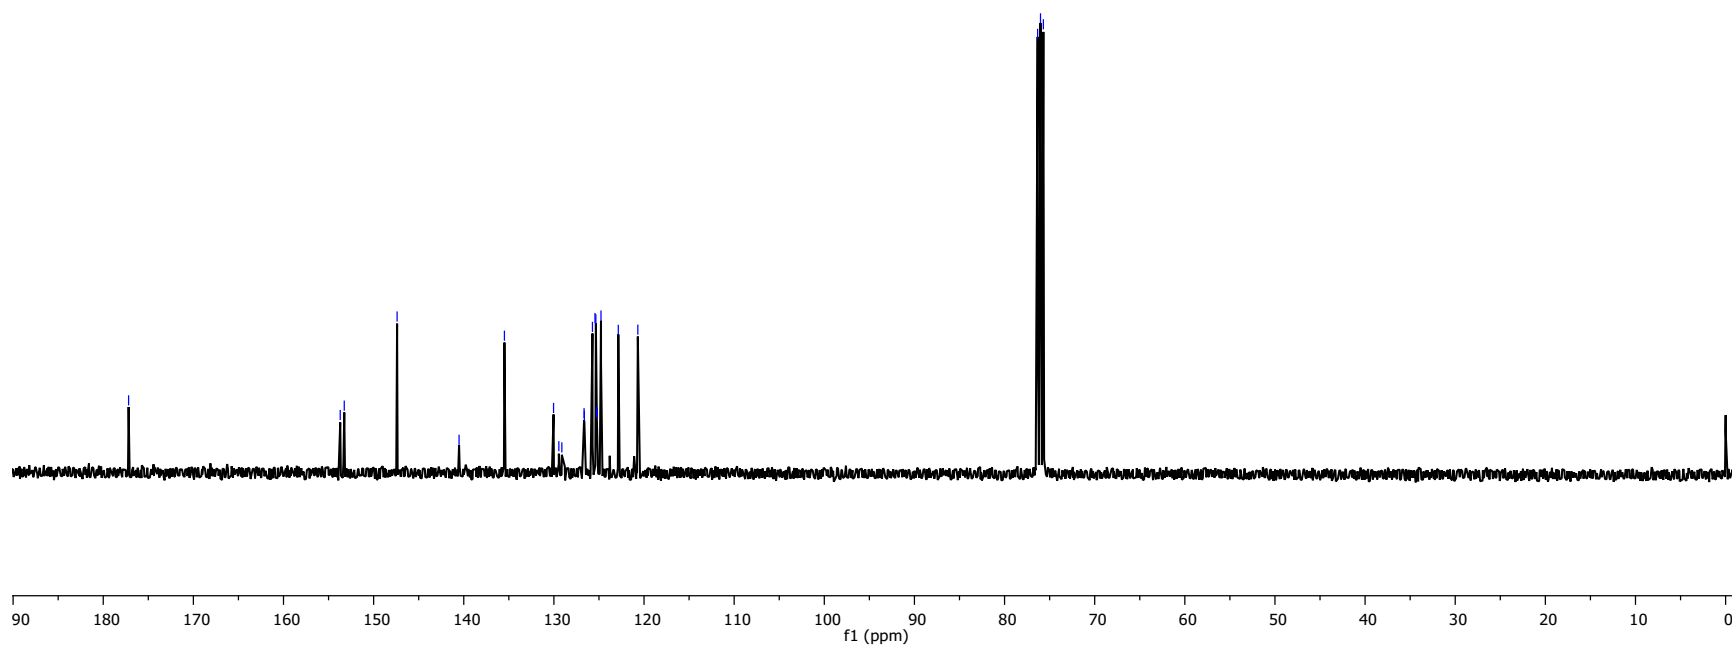

# HRMS of compound 5f

|               |               |             |                   |                 |              |                        |                       |
|---------------|---------------|-------------|-------------------|-----------------|--------------|------------------------|-----------------------|
| Sample Name   | SAMPLE        | Position    | P1-C4             | Instrument Name | Instrument 1 | User Name              |                       |
| Inj Vol       | 20            | InjPosition |                   | SampleType      | Sample       | IRM Calibration Status | Success               |
| Data Filename | SM-42L5R-20.d | ACQ Method  | ESI ALS 100-500.m | Comment         |              | Acquired Time          | 2/25/2021 12:21:22 PM |

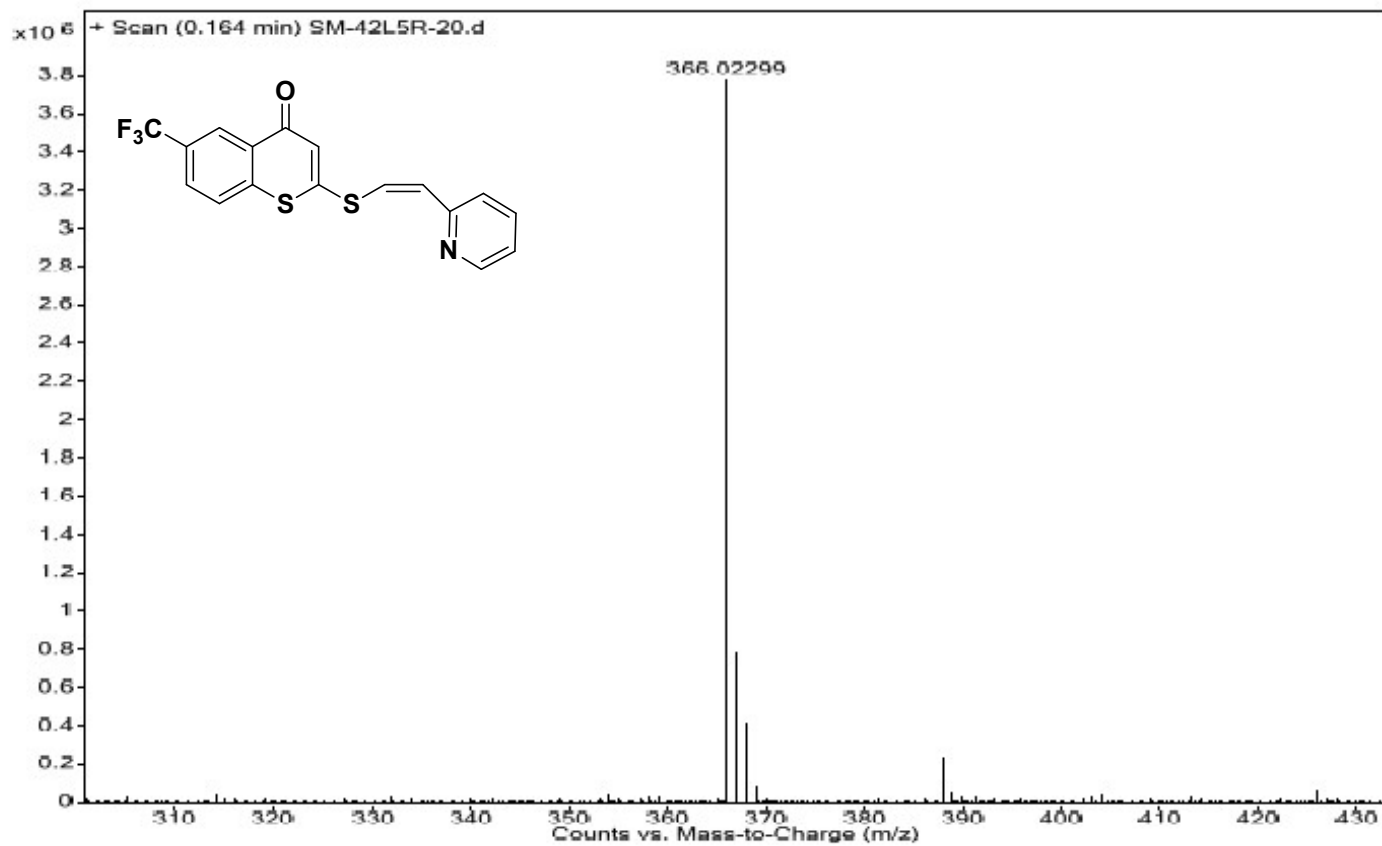

# <sup>1</sup>H NMR of compound 7a

SM-43A-21-1H.1.fid  
SM-43A-21-1H

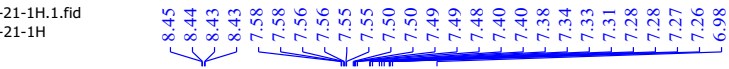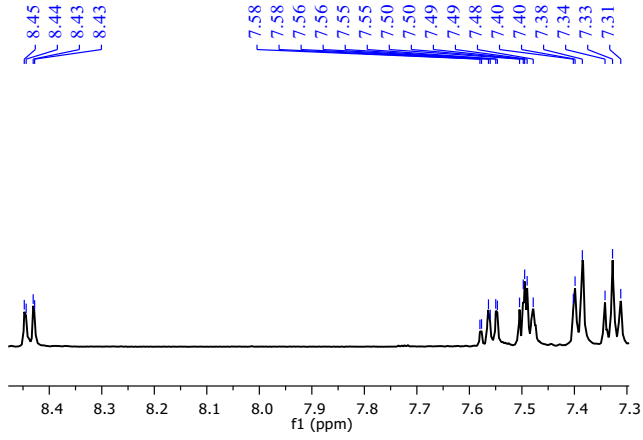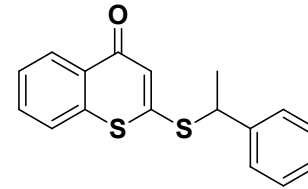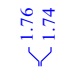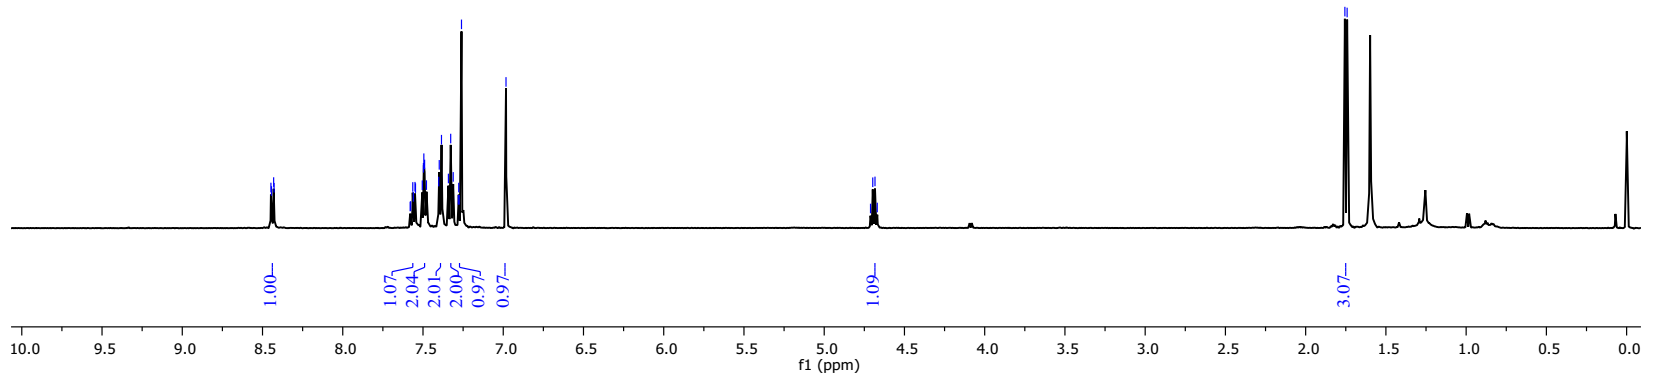

# <sup>13</sup>C NMR of compound 7a

SM-43A-21-13C.3.fid  
SM-43A-21-13C

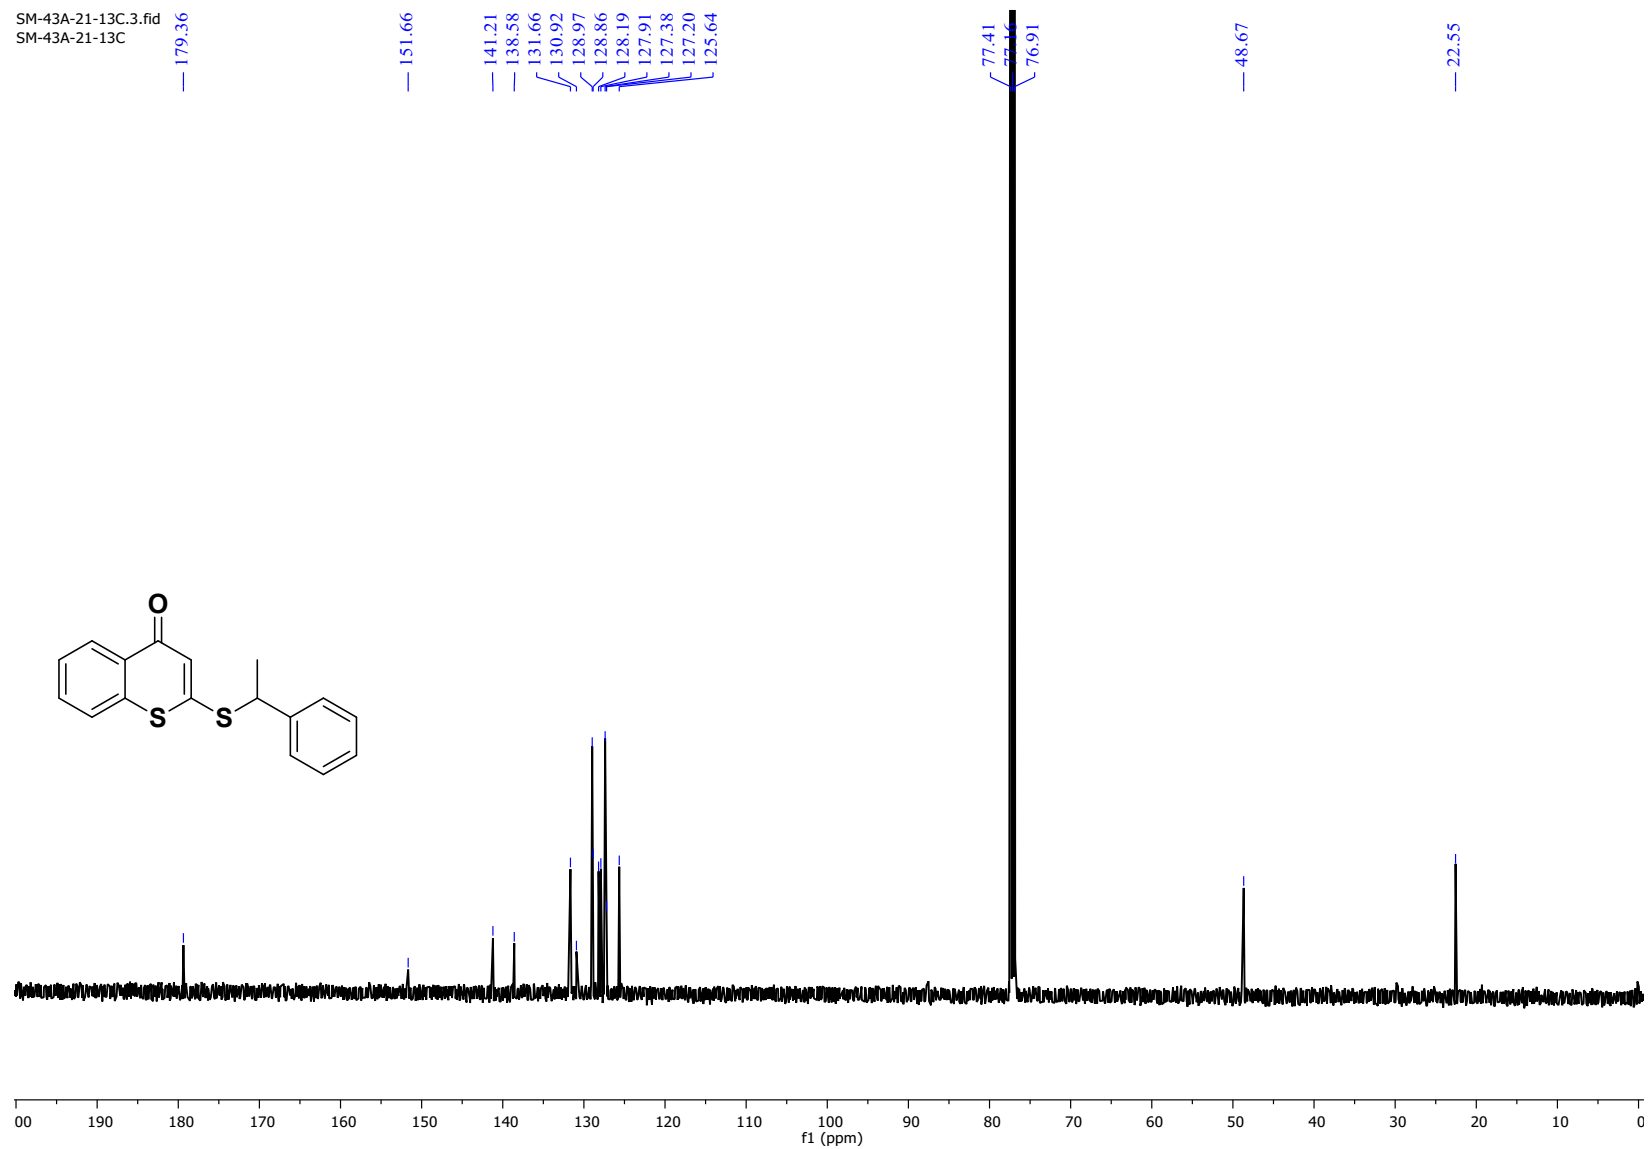

# HRMS of compound 7a

|               |                 |             |                    |                 |              |                        |                     |
|---------------|-----------------|-------------|--------------------|-----------------|--------------|------------------------|---------------------|
| Sample Name   | SAMPLE          | Position    | P2-A4              | Instrument Name | Instrument 1 | User Name              |                     |
| Inj Vol       | 20              | InjPosition |                    | SampleType      | Sample       | IRM Calibration Status | Success             |
| Data Filename | ATK-SM-43A-21.d | ACQ Method  | ESI ALS 100-1000.m | Comment         |              | Acquired Time          | 2/4/2021 4:33:06 PM |

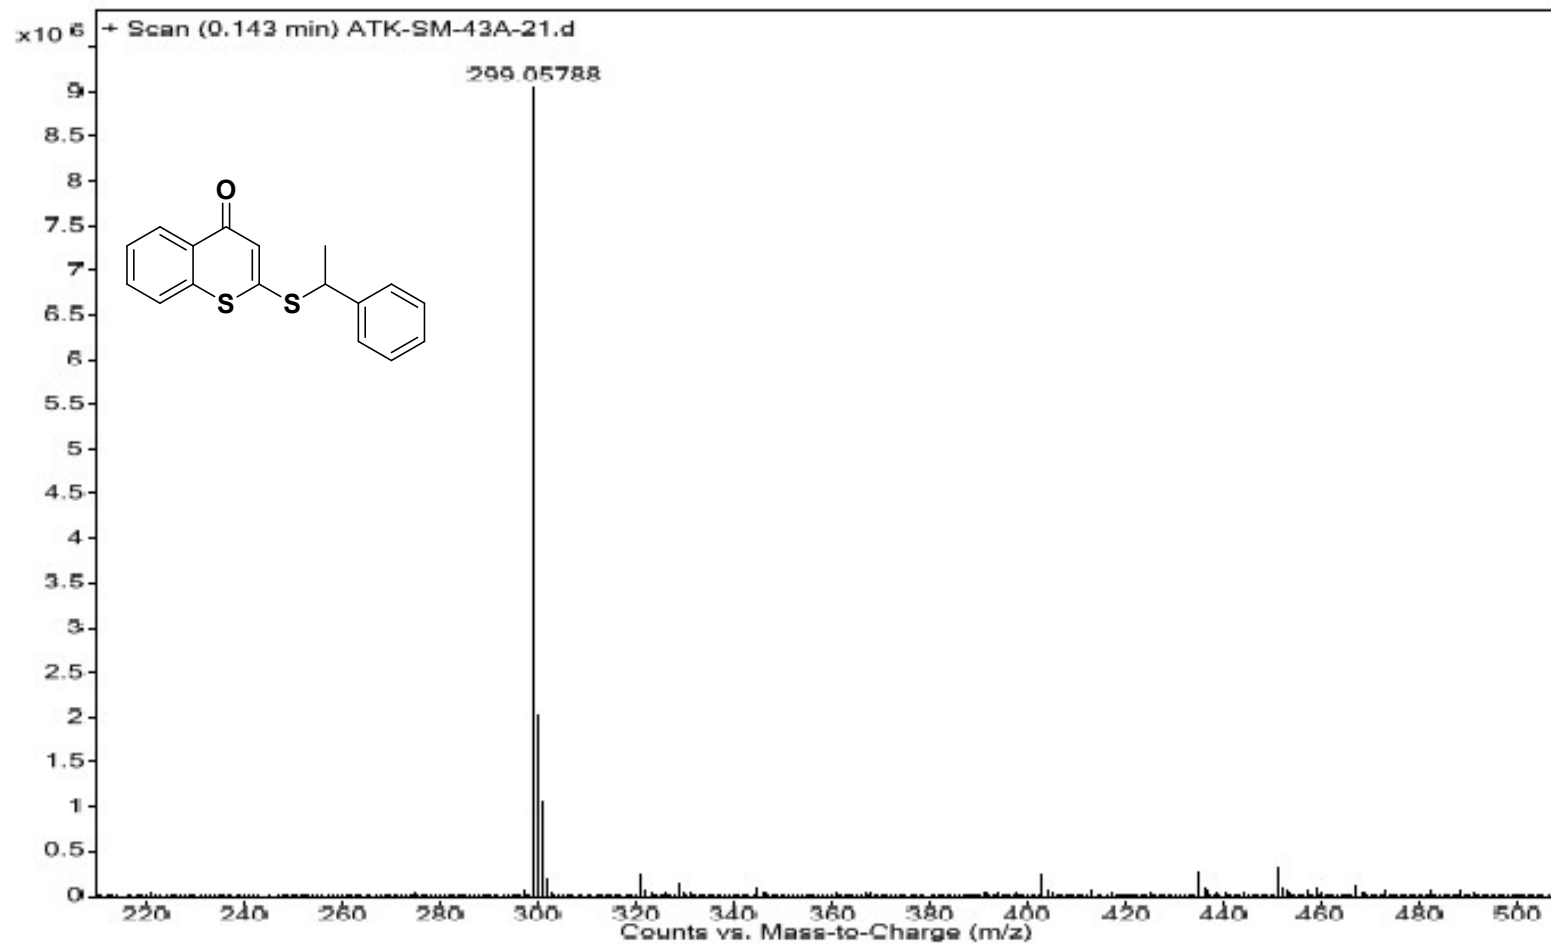

# <sup>1</sup>H NMR of compound 7b

ATK-SM-43B-21-1H.1.fid  
ATK-SM-43B-21-1H

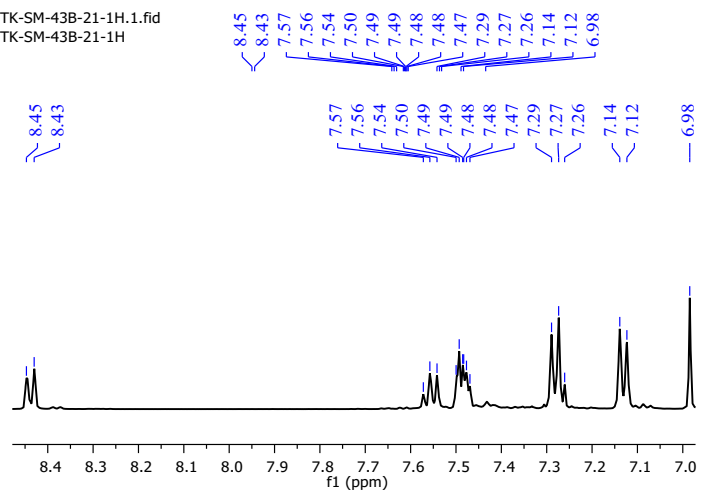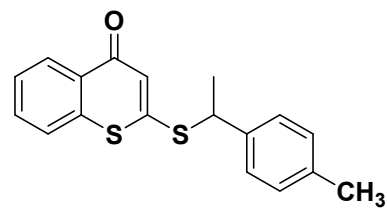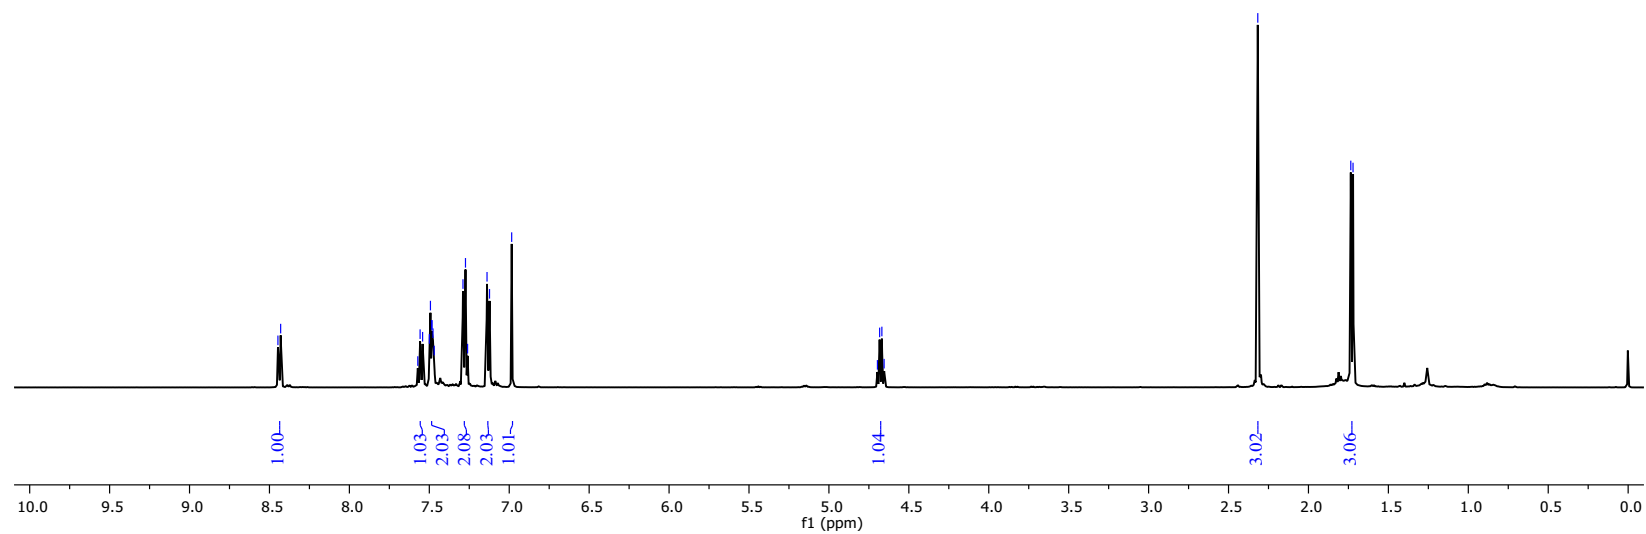

# <sup>13</sup>C NMR of compound 7b

ATK-SM-43B-21-13C.3.fid  
ATK-SM-43B-21-13C

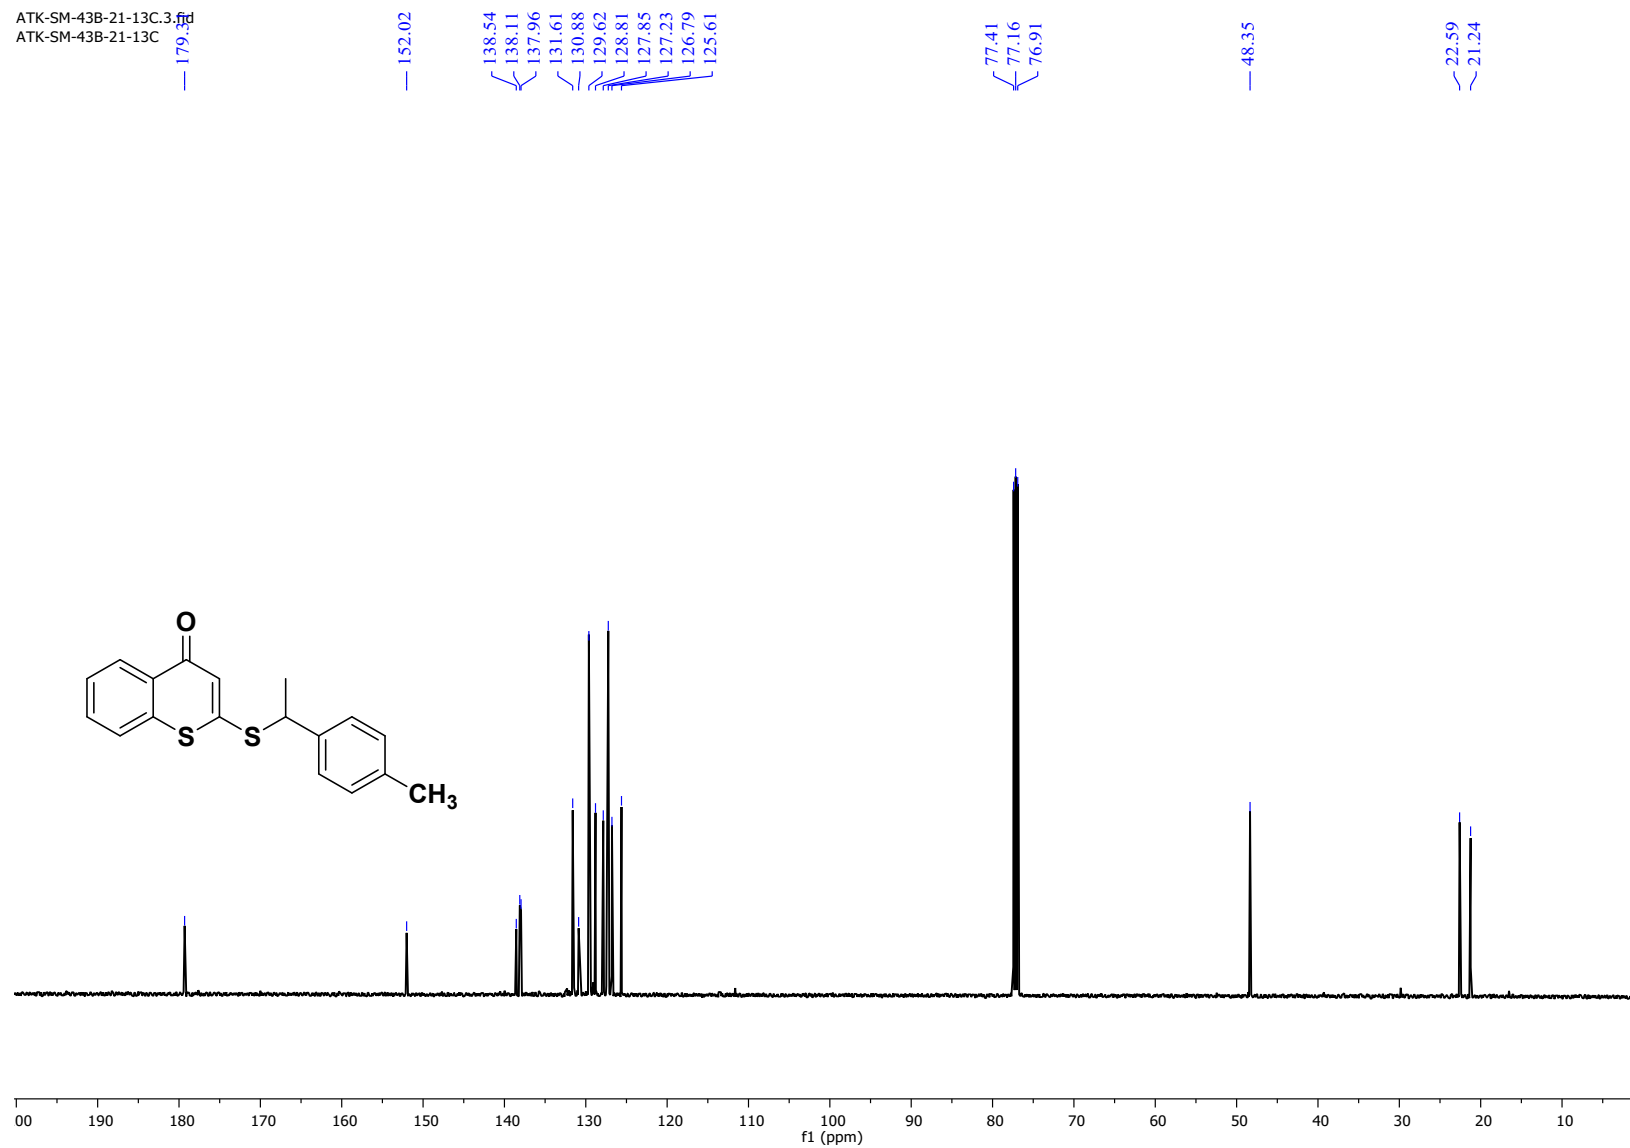



# HRMS of compound 7b

|               |             |             |                   |                 |              |                        |                       |
|---------------|-------------|-------------|-------------------|-----------------|--------------|------------------------|-----------------------|
| Sample Name   | SAMPLE 21   | Position    | P1-B7             | Instrument Name | Instrument 1 | User Name              |                       |
| Inj Vol       | 20          | InjPosition |                   | SampleType      | Sample       | IRM Calibration Status | Success               |
| Data Filename | SM-43B-21.d | ACQ Method  | ESI ALS 100-500.m | Comment         |              | Acquired Time          | 2/11/2021 12:43:44 PM |

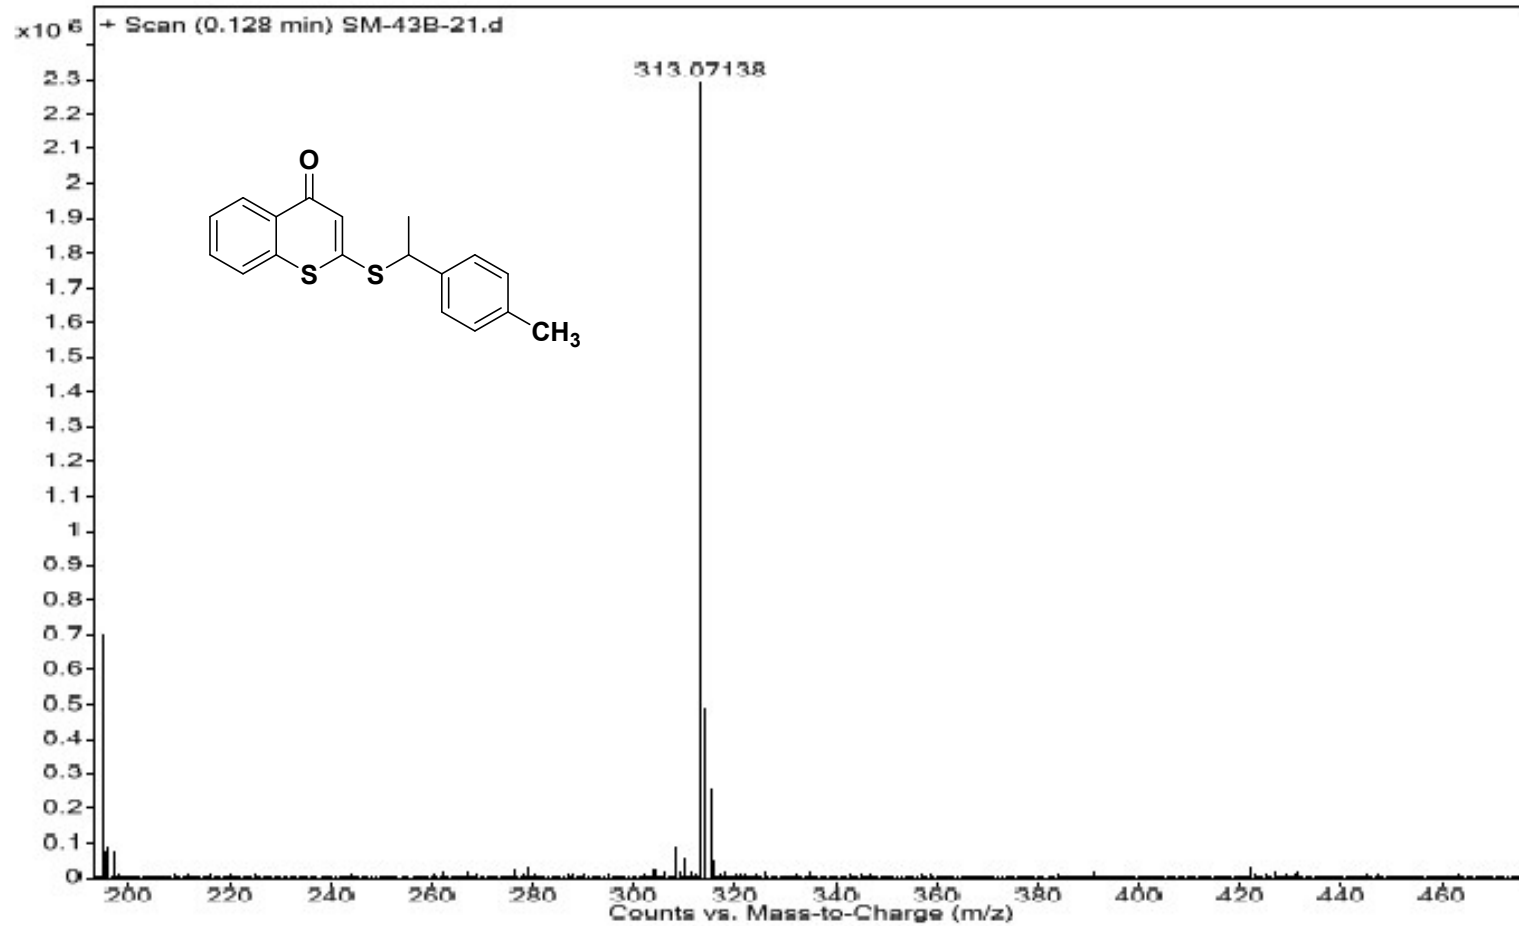

# <sup>1</sup>H NMR of compound 7c

ATK-SM-43D-21-1H.1.fid  
ATK-SM-43D-21-1H

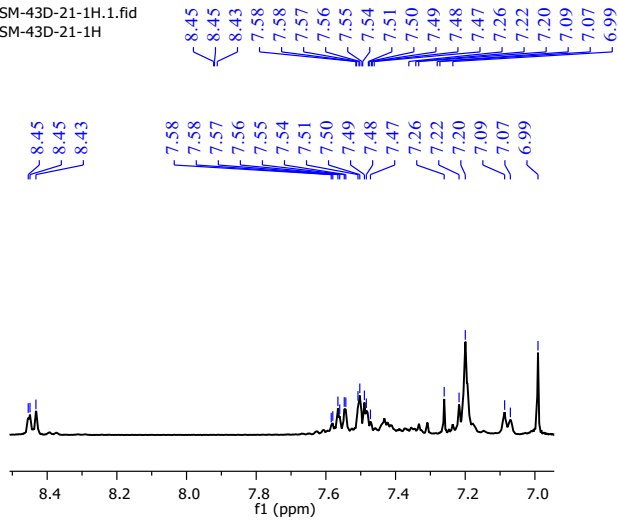

4.69  
4.67  
4.65  
4.64

2.34

1.74  
1.73

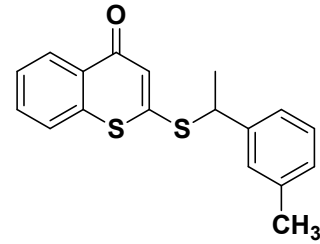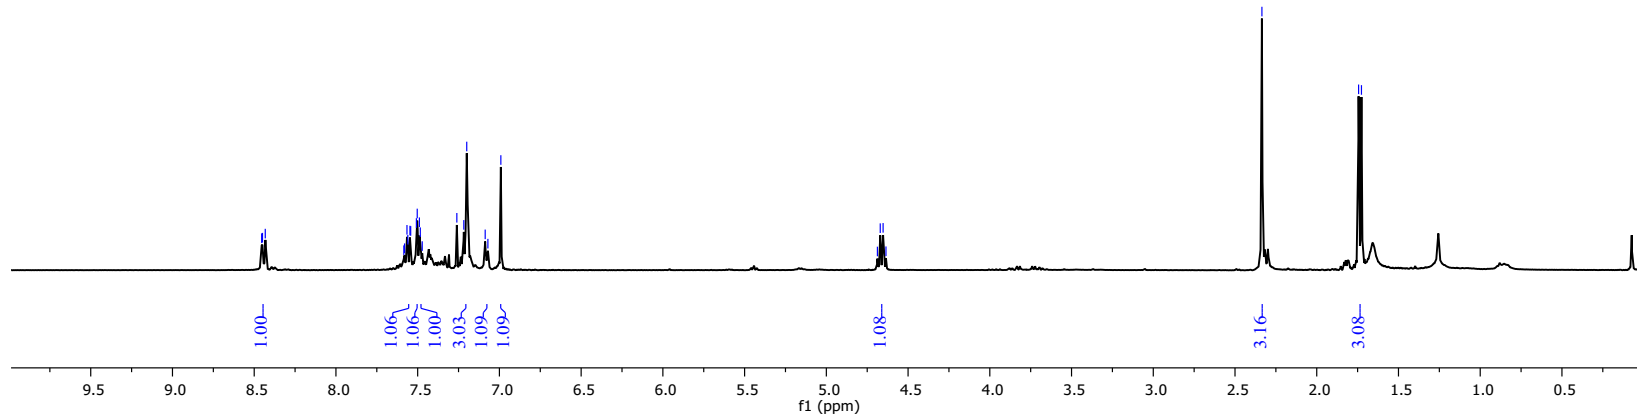

<sup>13</sup>C NMR of compound 7c

SM-43D-21-13C.1.fid

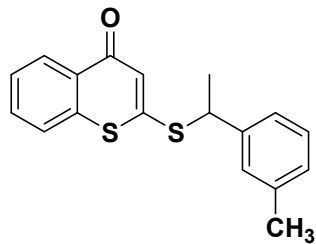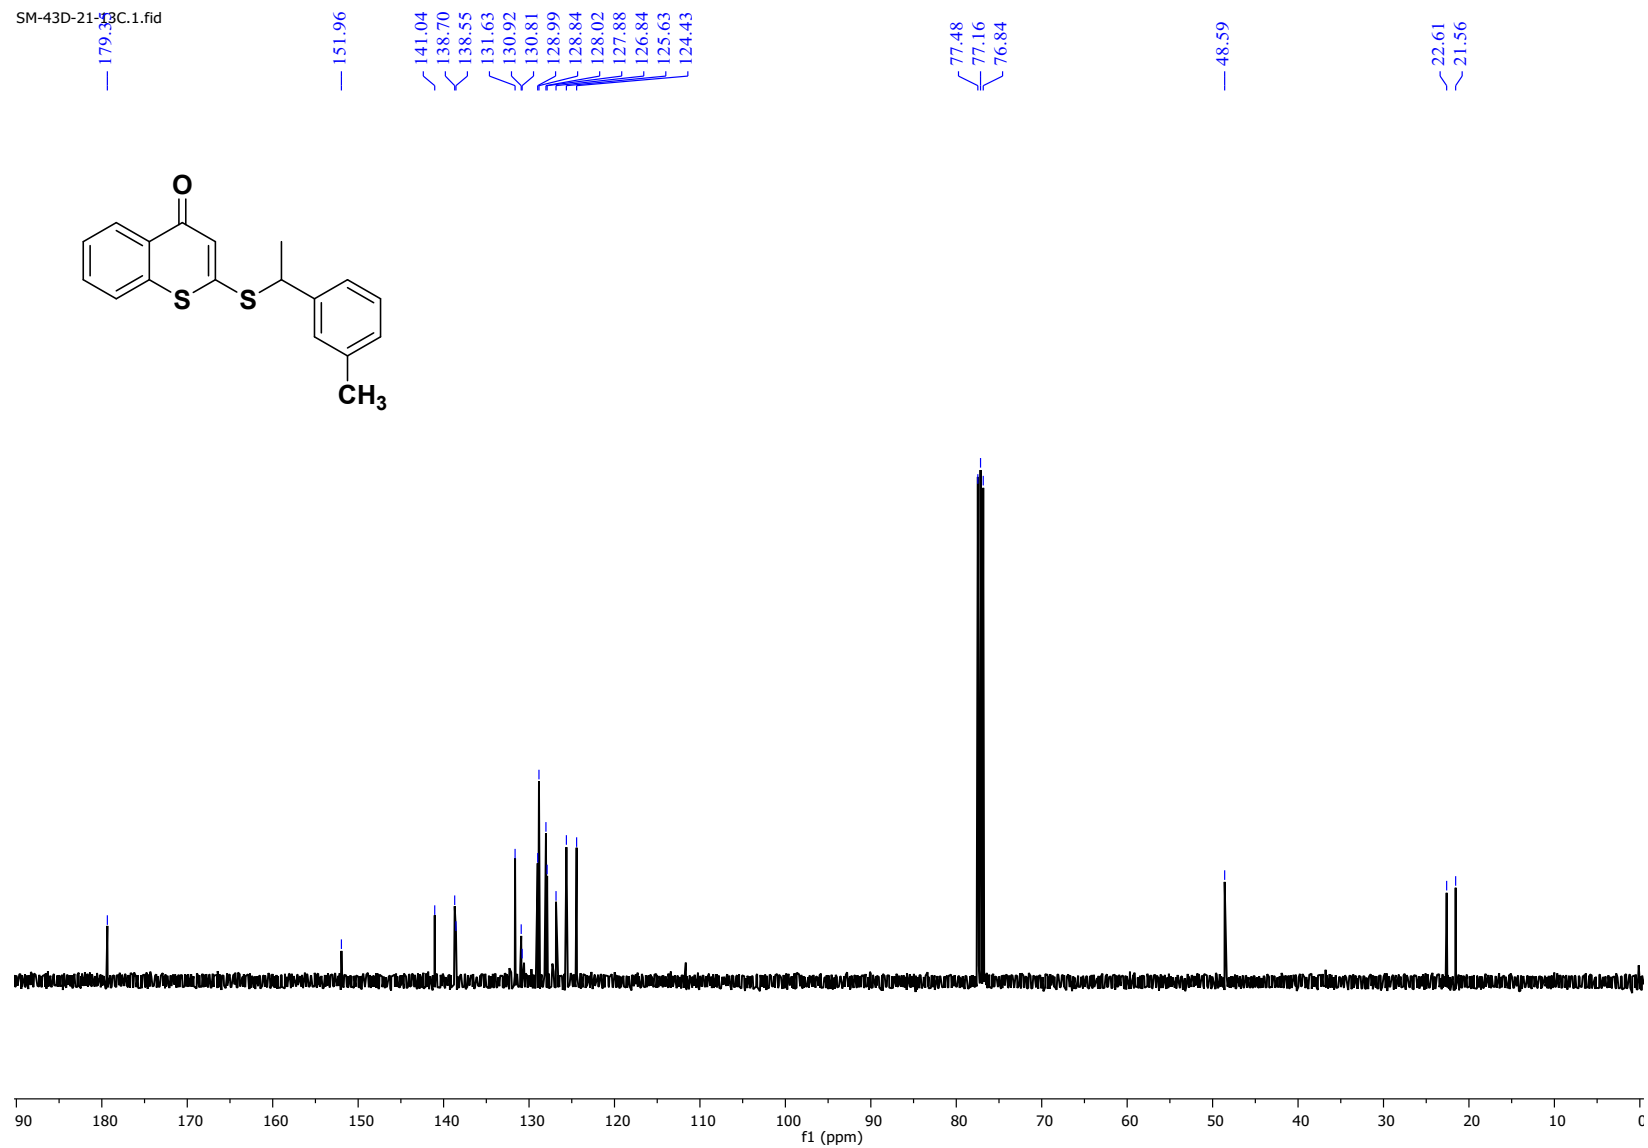

## HRMS of compound 7c

|               |                 |             |                    |                 |              |                        |                      |
|---------------|-----------------|-------------|--------------------|-----------------|--------------|------------------------|----------------------|
| Sample Name   | SAMPLE 11       | Position    | P2-A11             | Instrument Name | Instrument 1 | User Name              |                      |
| Inj Vol       | 20              | InjPosition |                    | SampleType      | Sample       | IRM Calibration Status | Success              |
| Data Filename | ATK-SM-43D-21.d | ACQ Method  | ESI ALS 100-1000.m | Comment         |              | Acquired Time          | 1/25/2021 6:55:47 PM |

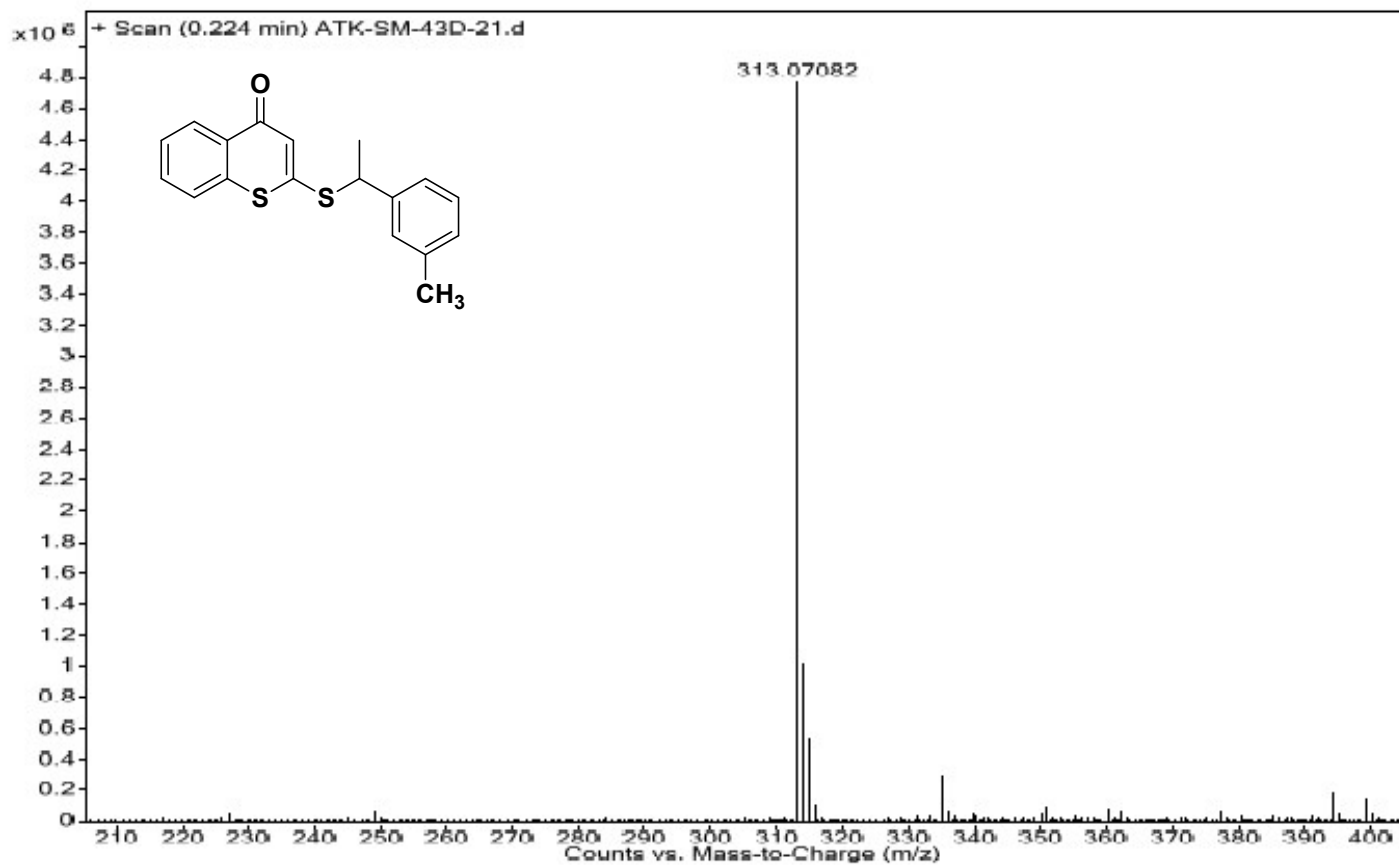

# <sup>1</sup>H NMR of compound 7d

SM-43E-21-1H.1.fid  
SM-43E-21-1H

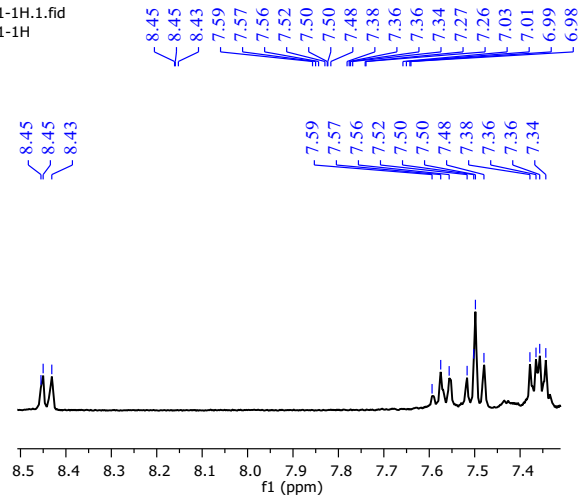

4.70  
4.68  
4.66  
4.65

1.73  
1.72

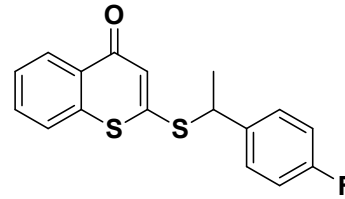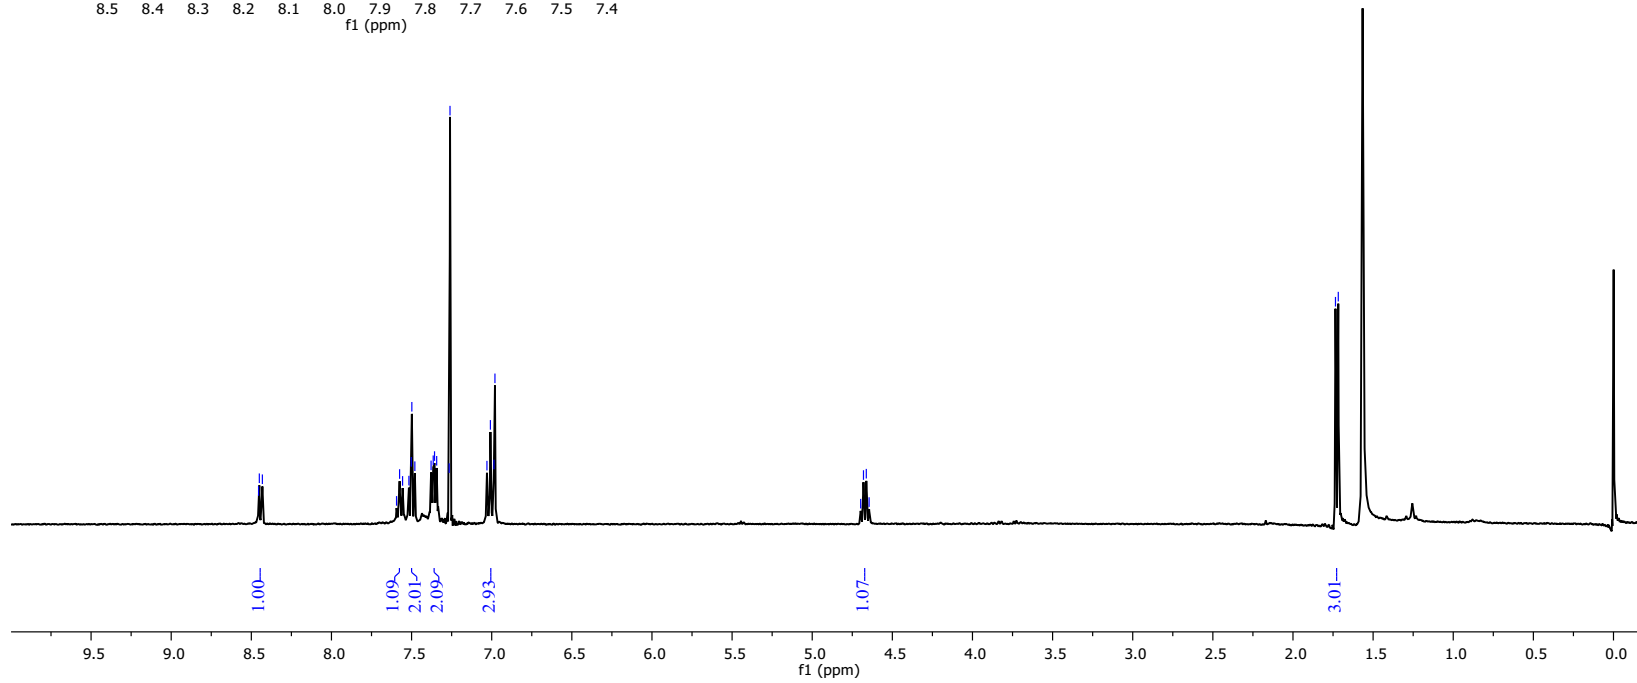

<sup>13</sup>C NMR of compound 7d

SM-43E-21-13 C.3.fid  
SM-43E-21-13 C

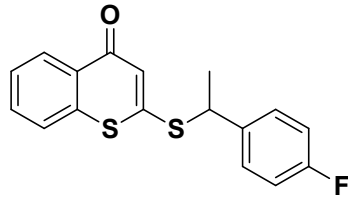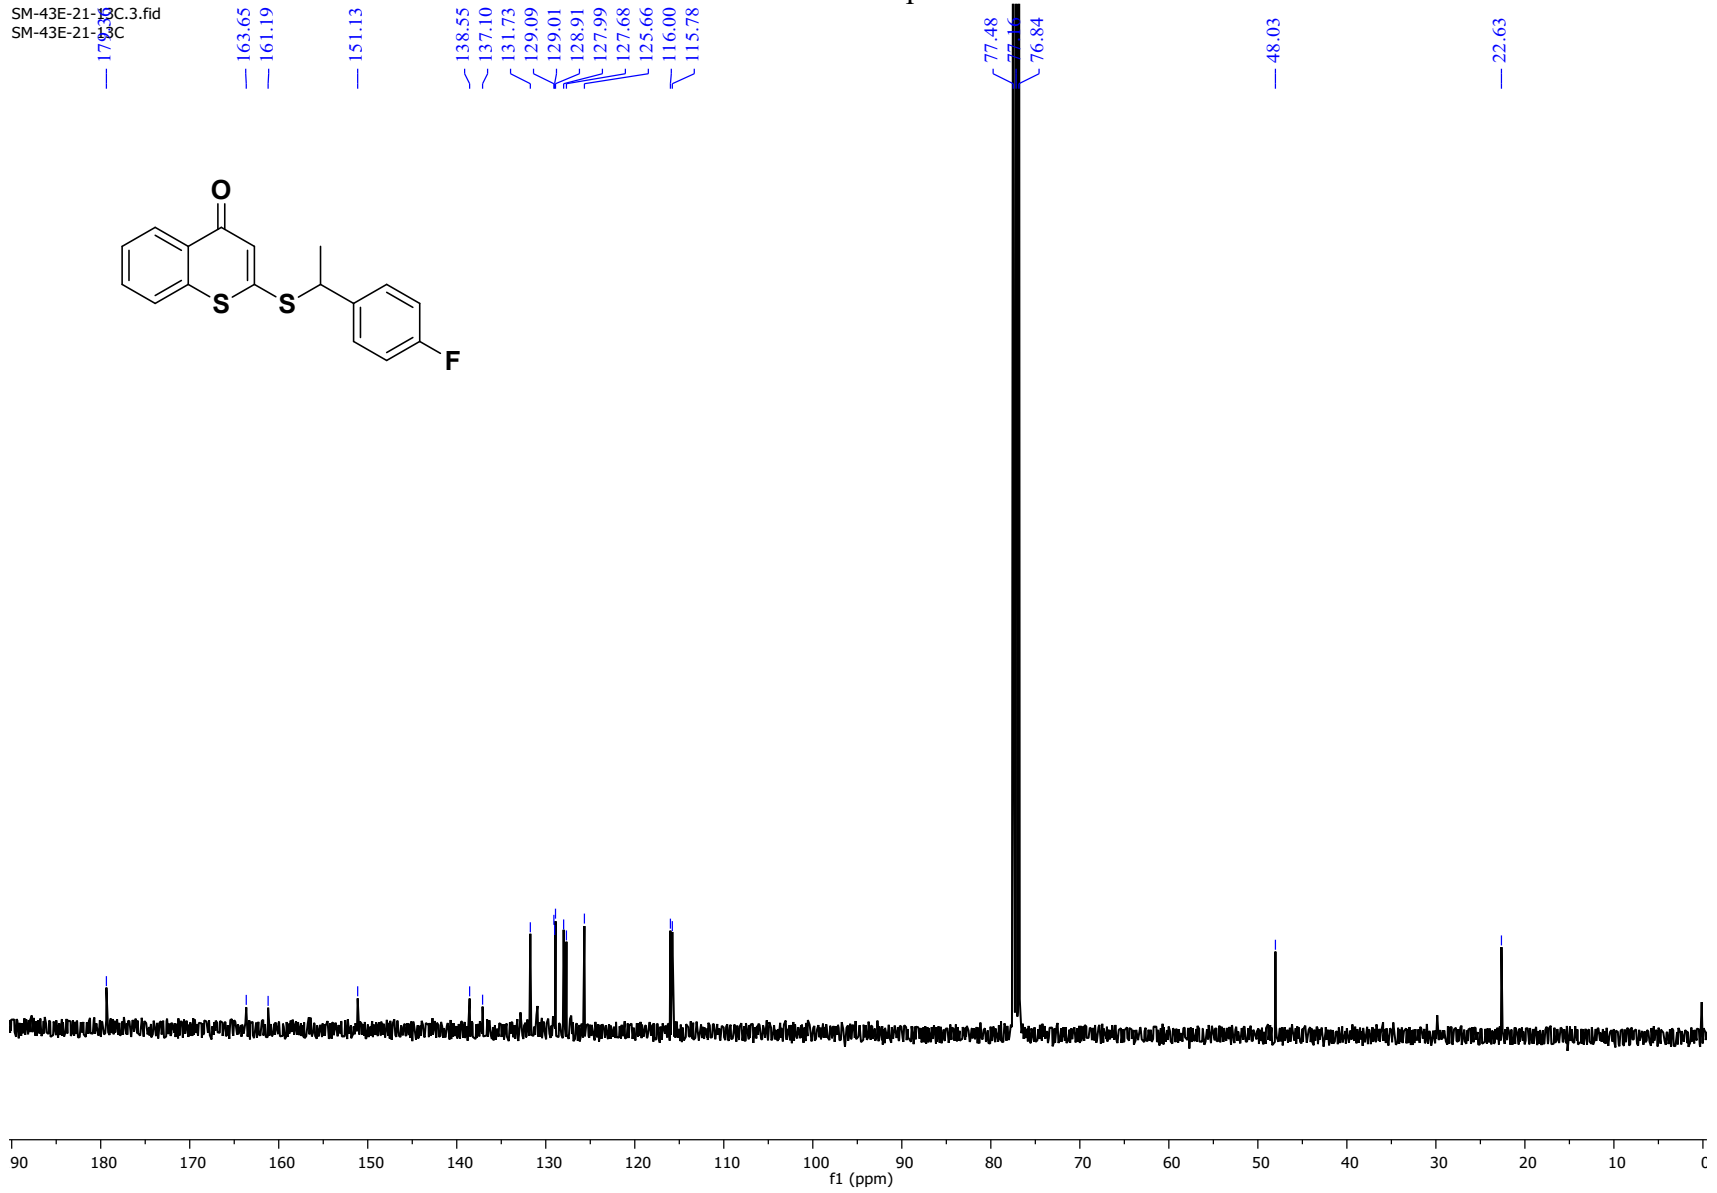

# HRMS of compound 7d

|                      |                 |                    |                   |                        |              |                               |                      |
|----------------------|-----------------|--------------------|-------------------|------------------------|--------------|-------------------------------|----------------------|
| <b>Sample Name</b>   | SAMPLE 11       | <b>Position</b>    | P1-A9             | <b>Instrument Name</b> | Instrument 1 | <b>User Name</b>              |                      |
| <b>Inj Vol</b>       | 20              | <b>InjPosition</b> |                   | <b>SampleType</b>      | Sample       | <b>IRM Calibration Status</b> | Success              |
| <b>Data Filename</b> | ATK-SM-43E-21.d | <b>ACQ Method</b>  | ESI ALS 100-500.m | <b>Comment</b>         |              | <b>Acquired Time</b>          | 2/18/2021 2:10:04 PM |

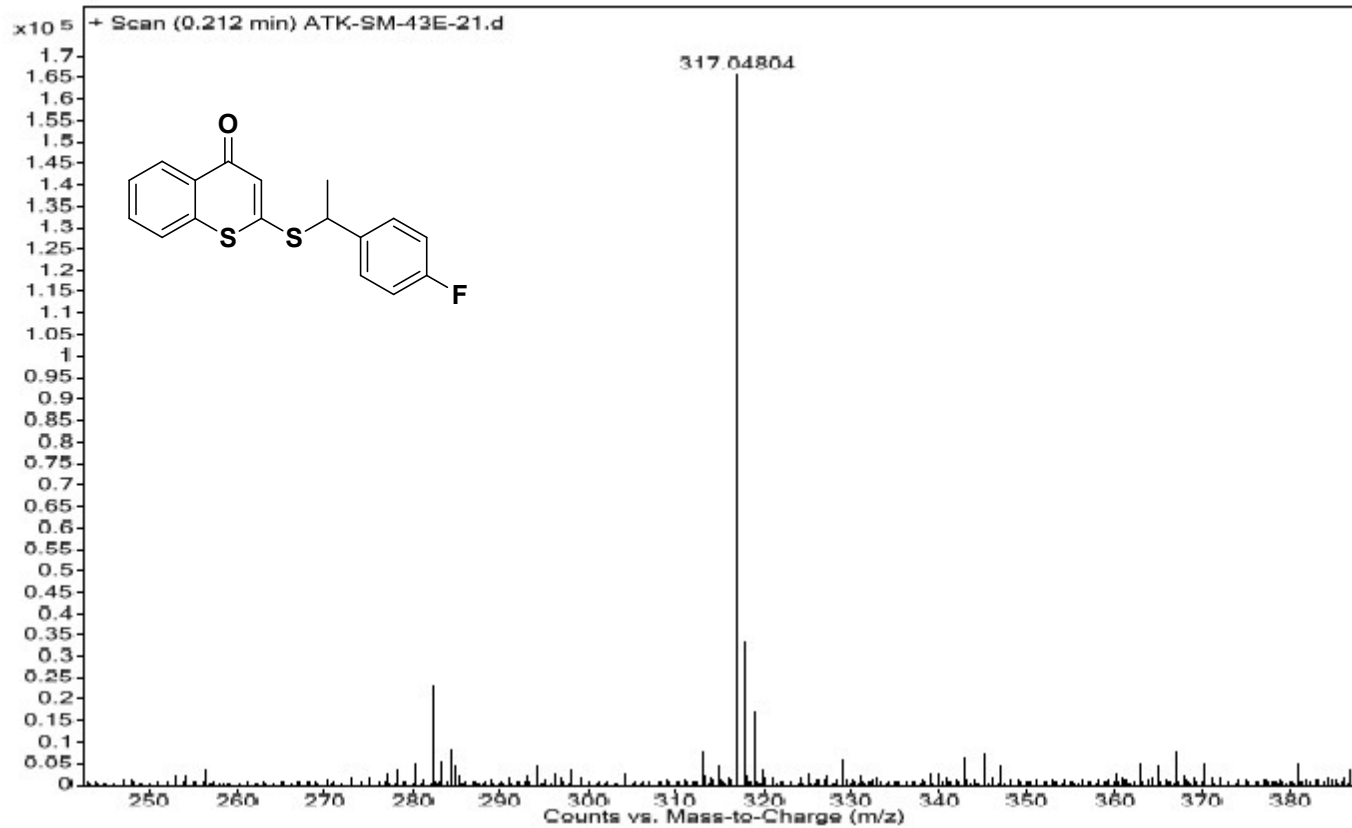

<sup>1</sup>H NMR of compound 7e

SM-43F-21-1H.1.fid  
SM-43F-21-1H

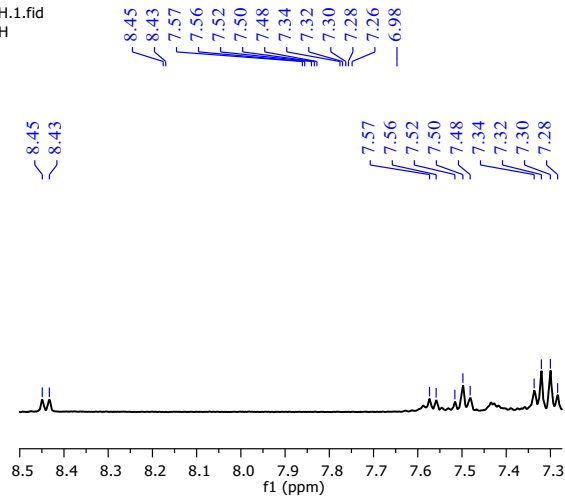

4.67  
4.66  
4.64  
4.63

1.72  
1.71

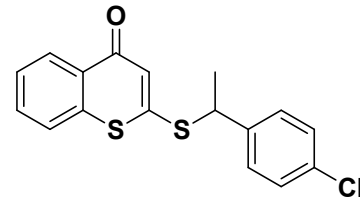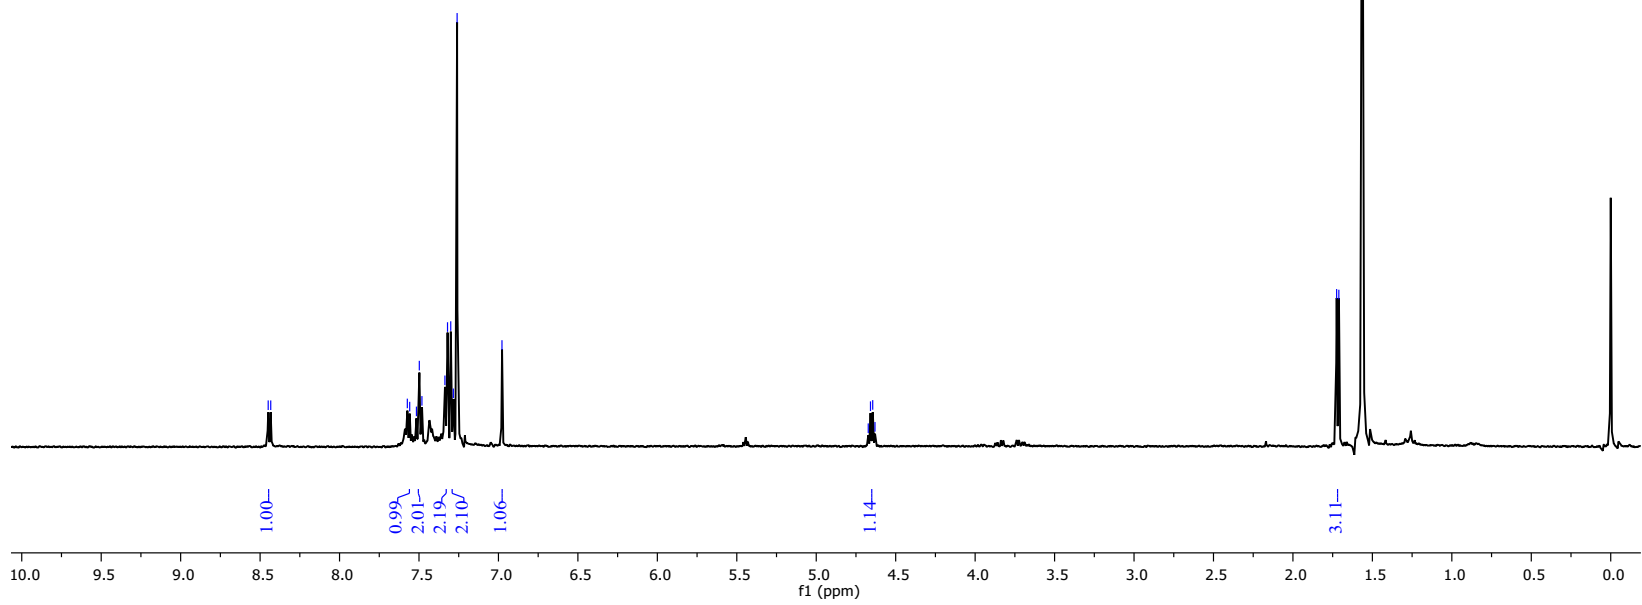



<sup>13</sup>C NMR of compound 7e

SM-43F-21-13C.3.fid  
SM-43F-21-13C

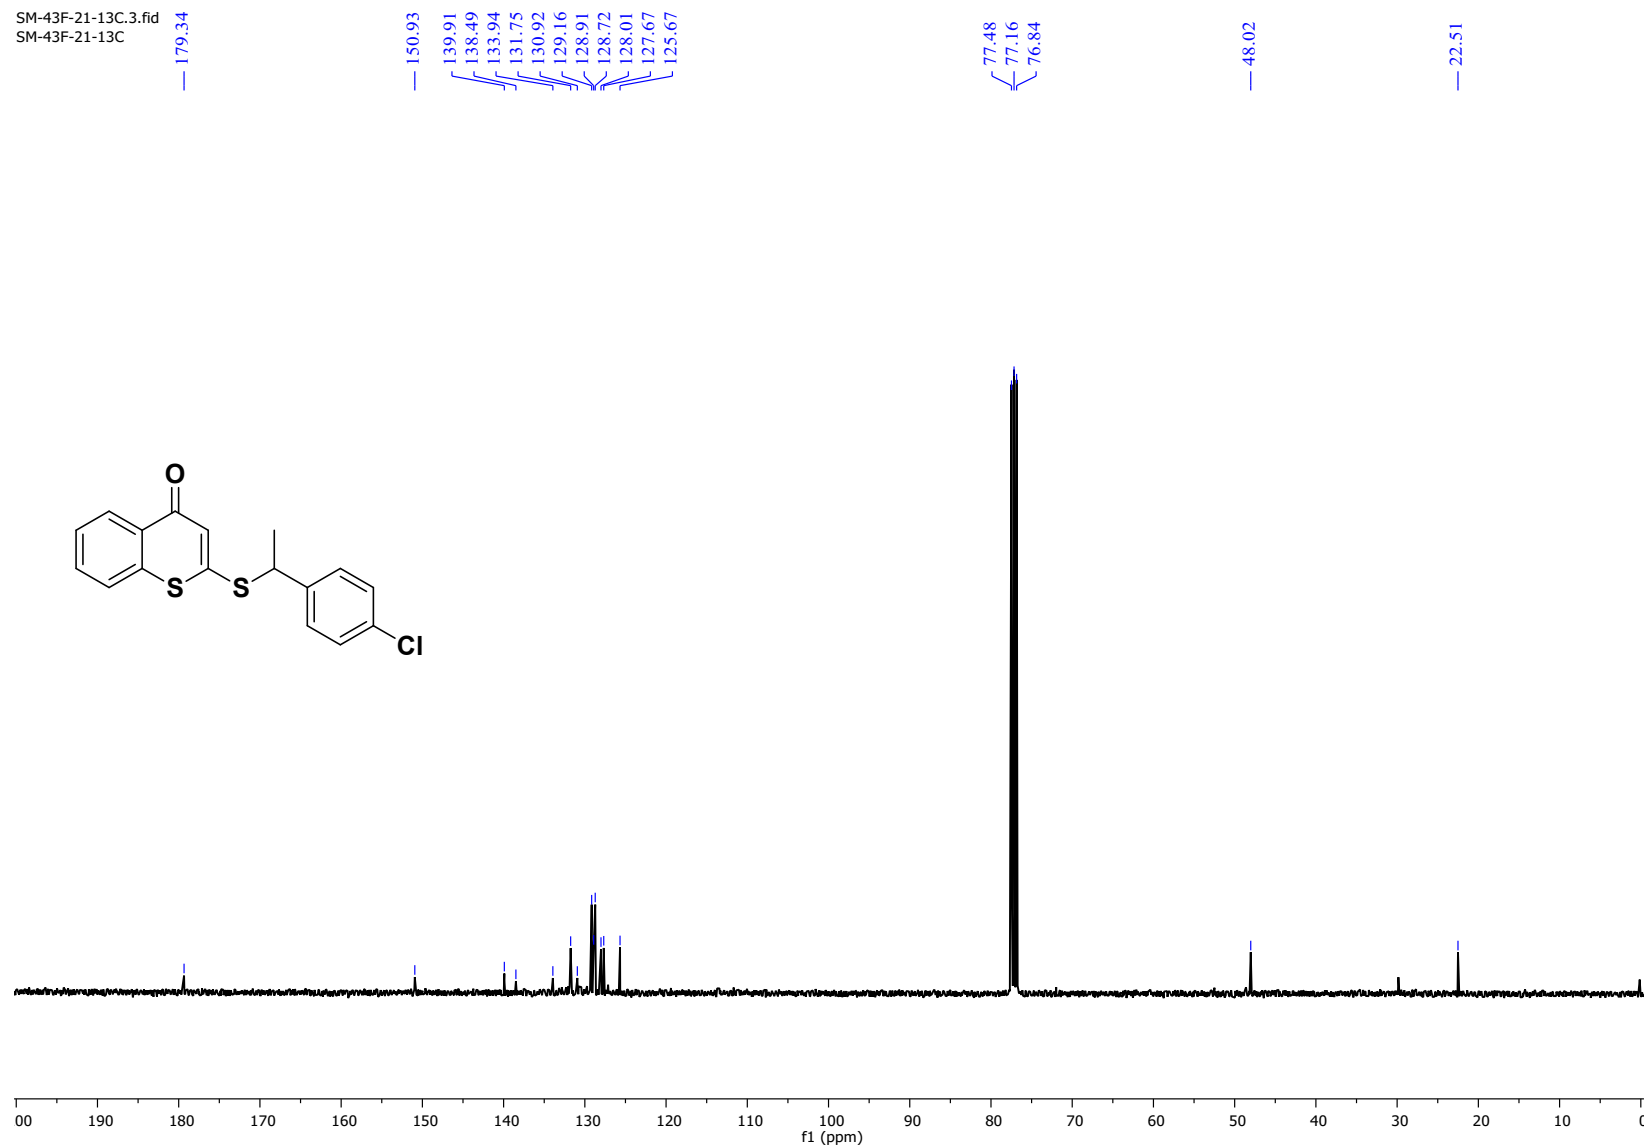

# HRMS of compound 7e

|                      |                |                    |                   |                        |              |                               |                      |
|----------------------|----------------|--------------------|-------------------|------------------------|--------------|-------------------------------|----------------------|
| <b>Sample Name</b>   | SAMPLE 12      | <b>Position</b>    | P1-A10            | <b>Instrument Name</b> | Instrument 1 | <b>User Name</b>              |                      |
| <b>Inj Vol</b>       | 20             | <b>InjPosition</b> |                   | <b>SampleType</b>      | Sample       | <b>IRM Calibration Status</b> | Success              |
| <b>Data Filename</b> | ATK-SM-4F-21.d | <b>ACQ Method</b>  | ESI ALS 100-500.m | <b>Comment</b>         |              | <b>Acquired Time</b>          | 2/18/2021 2:19:32 PM |

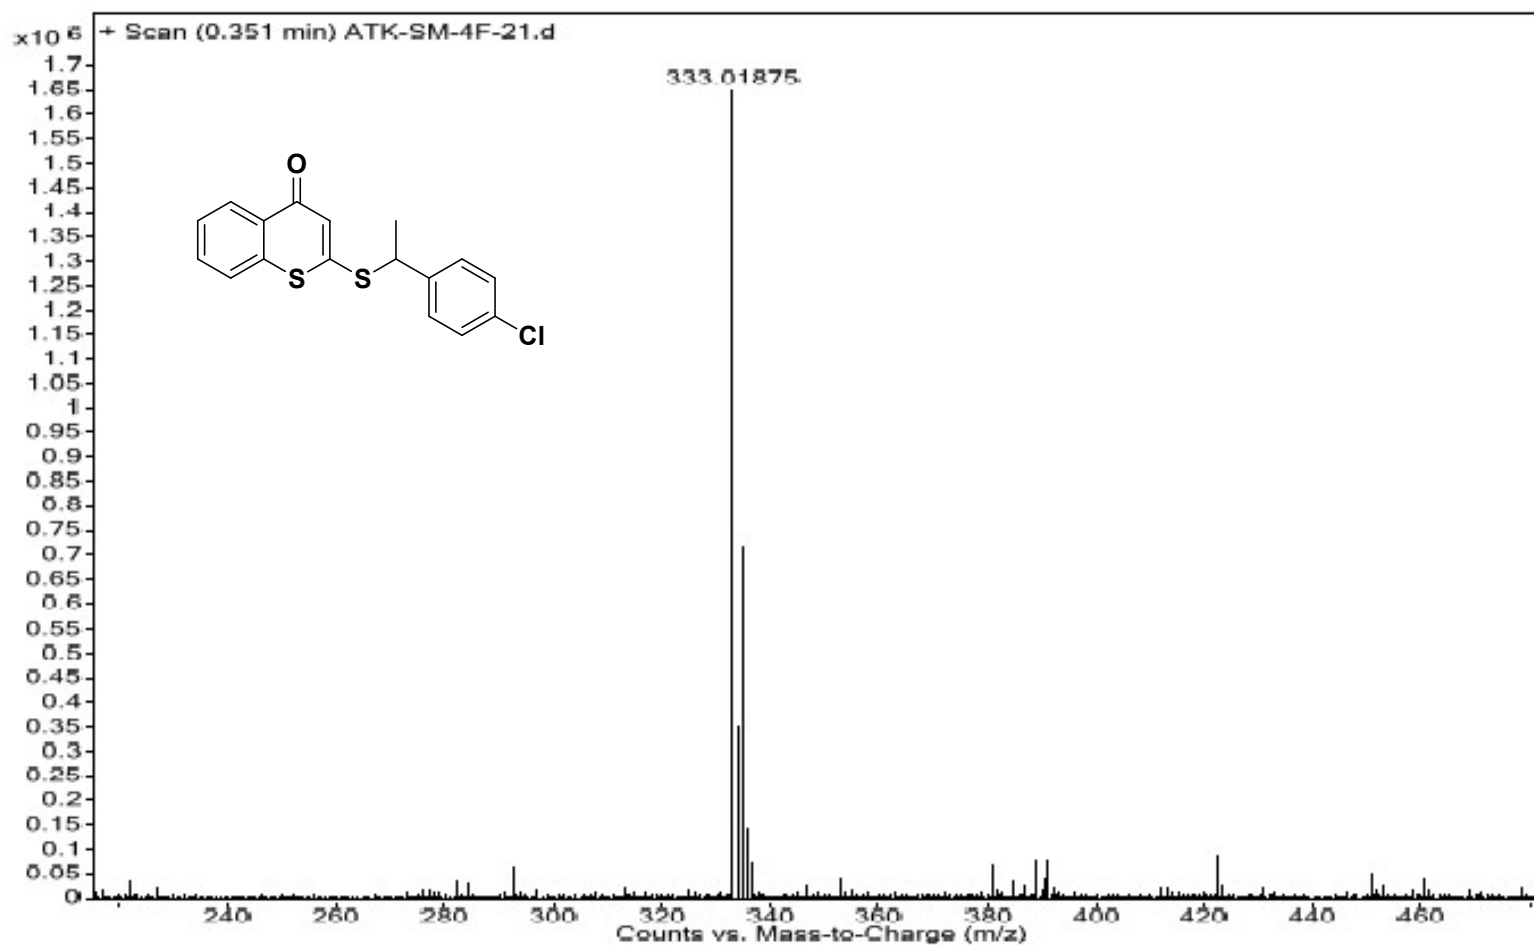

# <sup>1</sup>H NMR of compound 7f

ATK-SM-43G-21-1H.1.fid  
ATK-SM-43G-21-1H

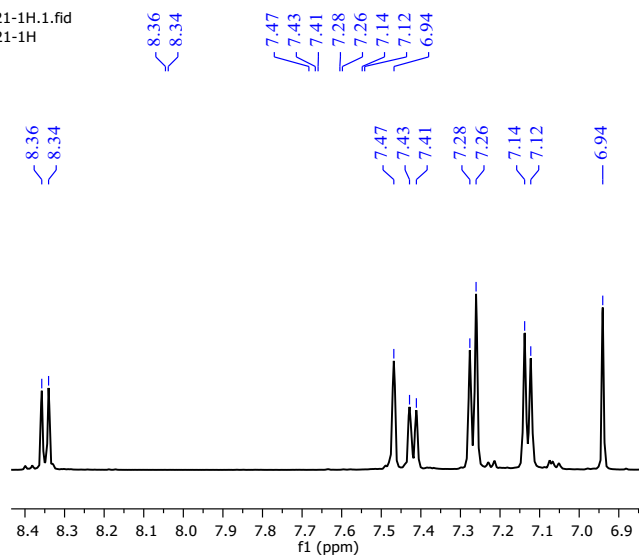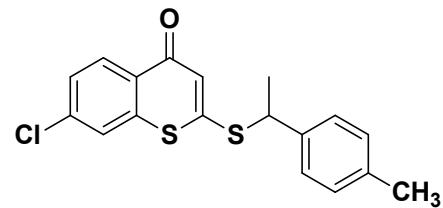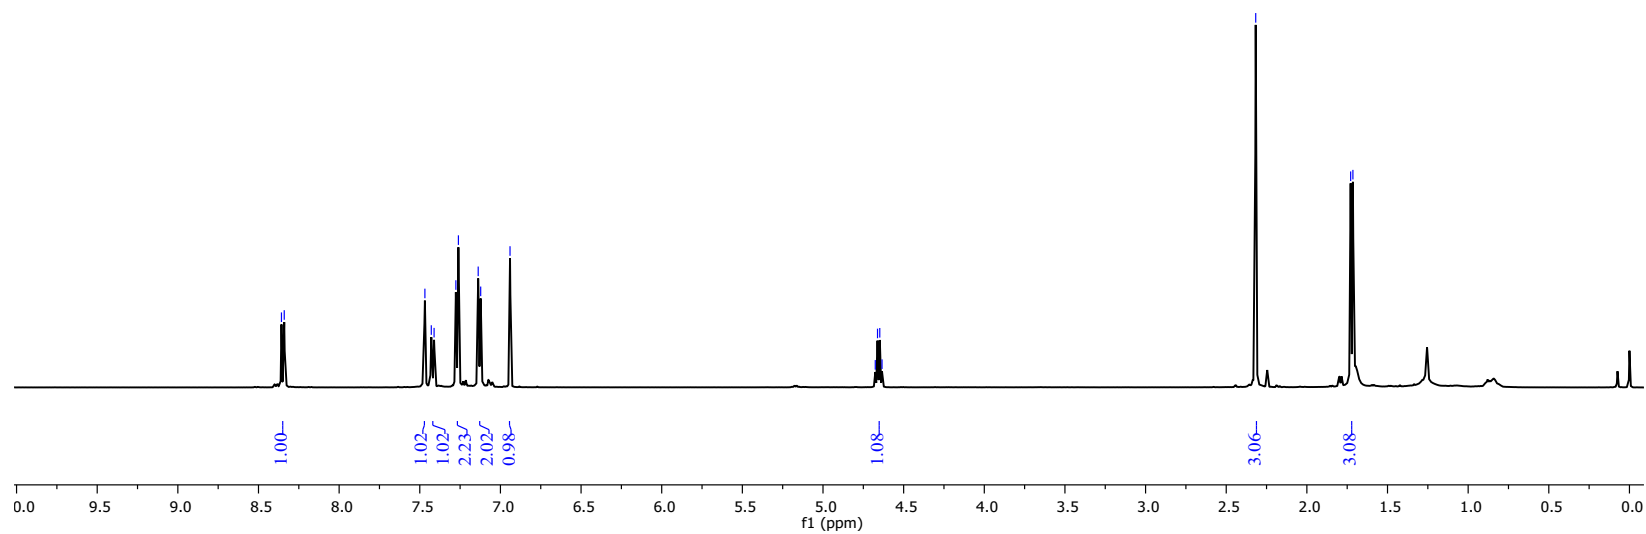

# <sup>13</sup>C NMR of compound 7f

ATK-SM-43G-21-13C.1.fg  
ATK-SM-43G-21-13C

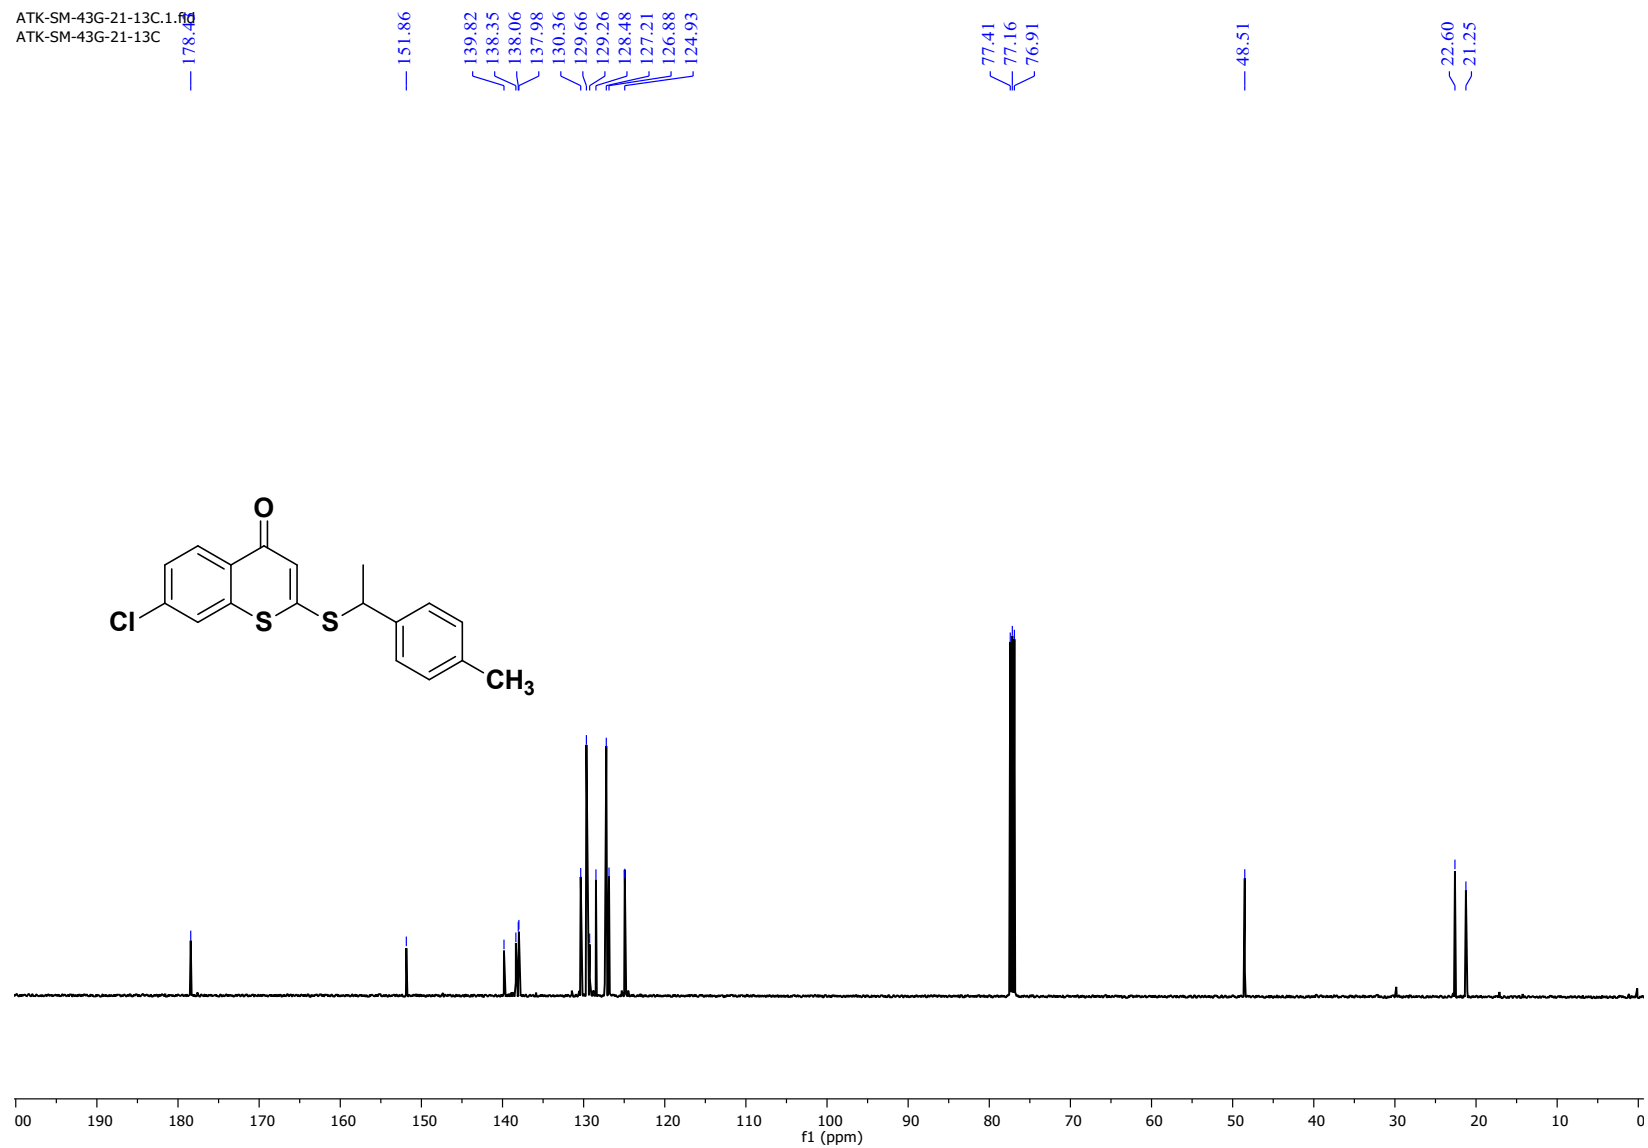

# HRMS of compound 7f

|               |              |             |                    |                 |              |                        |                      |
|---------------|--------------|-------------|--------------------|-----------------|--------------|------------------------|----------------------|
| Sample Name   | SAMPLE       | Position    | P2-A8              | Instrument Name | Instrument 1 | User Name              |                      |
| Inj Vol       | 20           | InjPosition |                    | SampleType      | Sample       | IRM Calibration Status | Success              |
| Data Filename | SM-43-G-21.d | ACQ Method  | ESI ALS 100-1000.m | Comment         |              | Acquired Time          | 2/18/2021 5:06:44 PM |

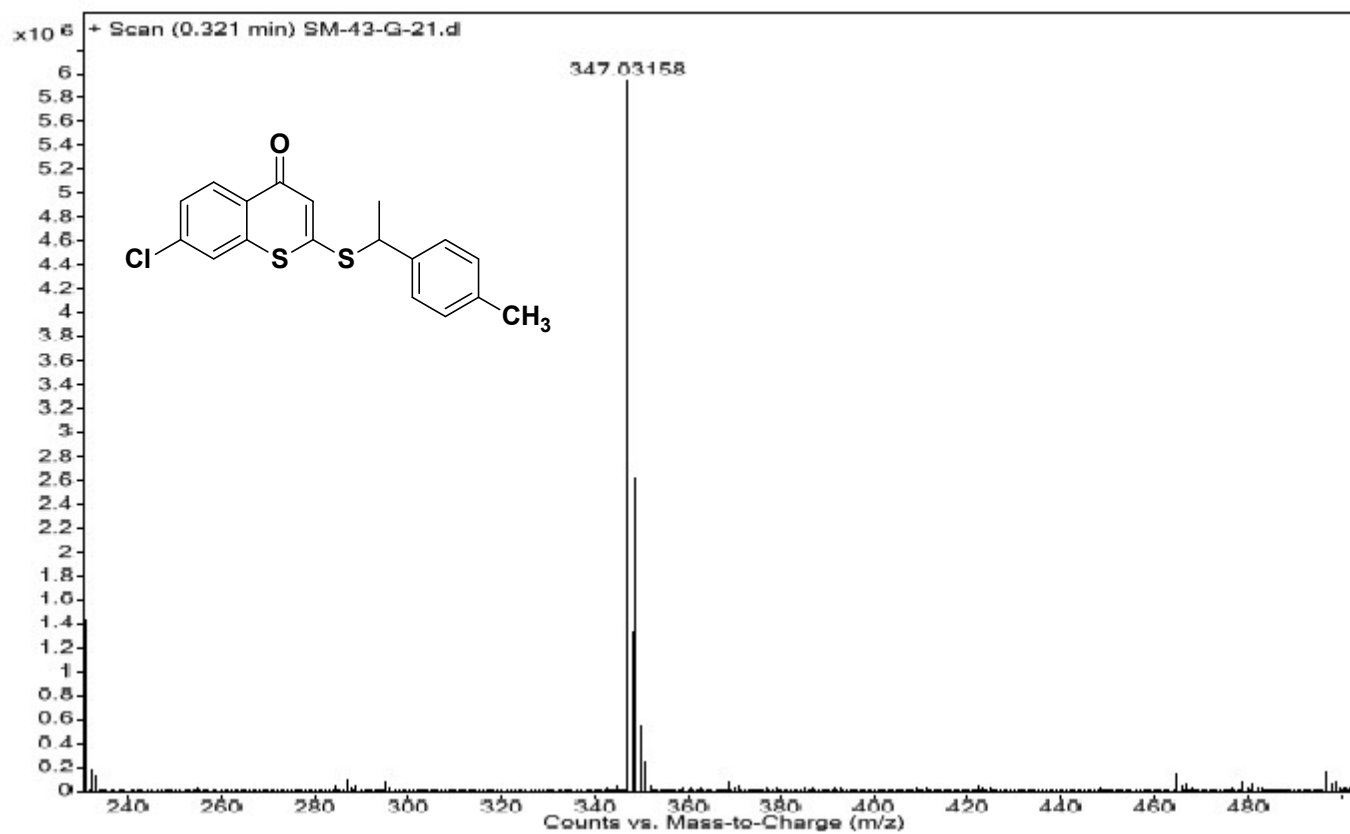

# <sup>1</sup>H NMR of compound 7g

ATK-SM-43H-21-1H.1.fid  
ATK-SM-43H-21-1H

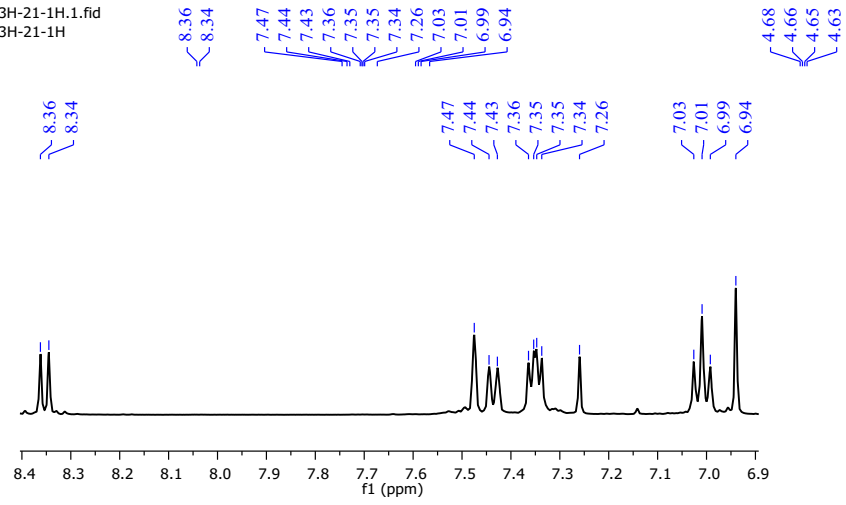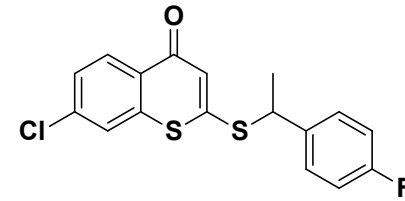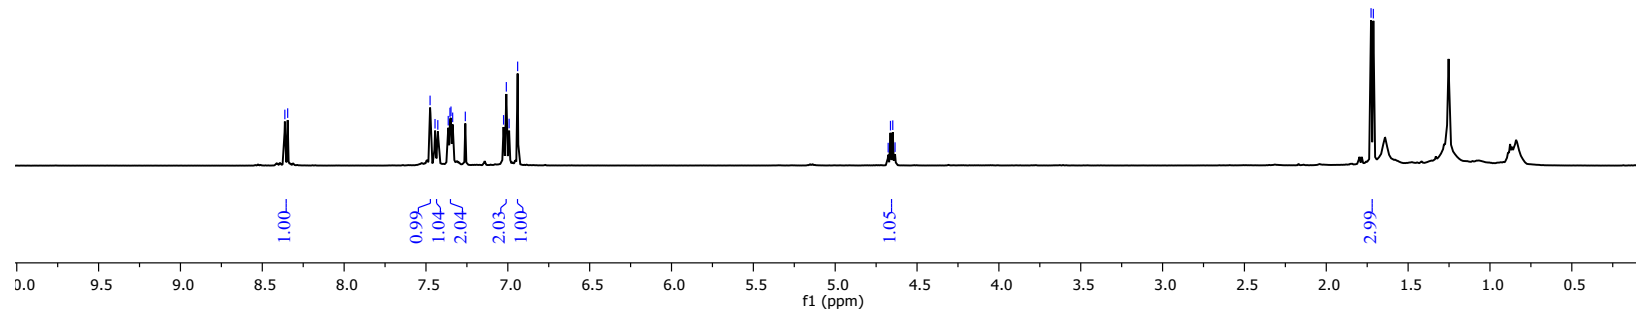

<sup>13</sup>C NMR of compound 7g

SM-43H-21-13C.1.fid  
SM-43H-21-13C

178.48

163.40

161.43

151.09

139.78

138.52

136.90

136.87

130.42

129.23

129.05

129.00

128.99

128.63

127.63

124.98

116.02

115.85

77.41

77.16

76.91

48.11

22.62

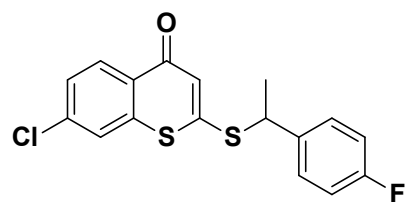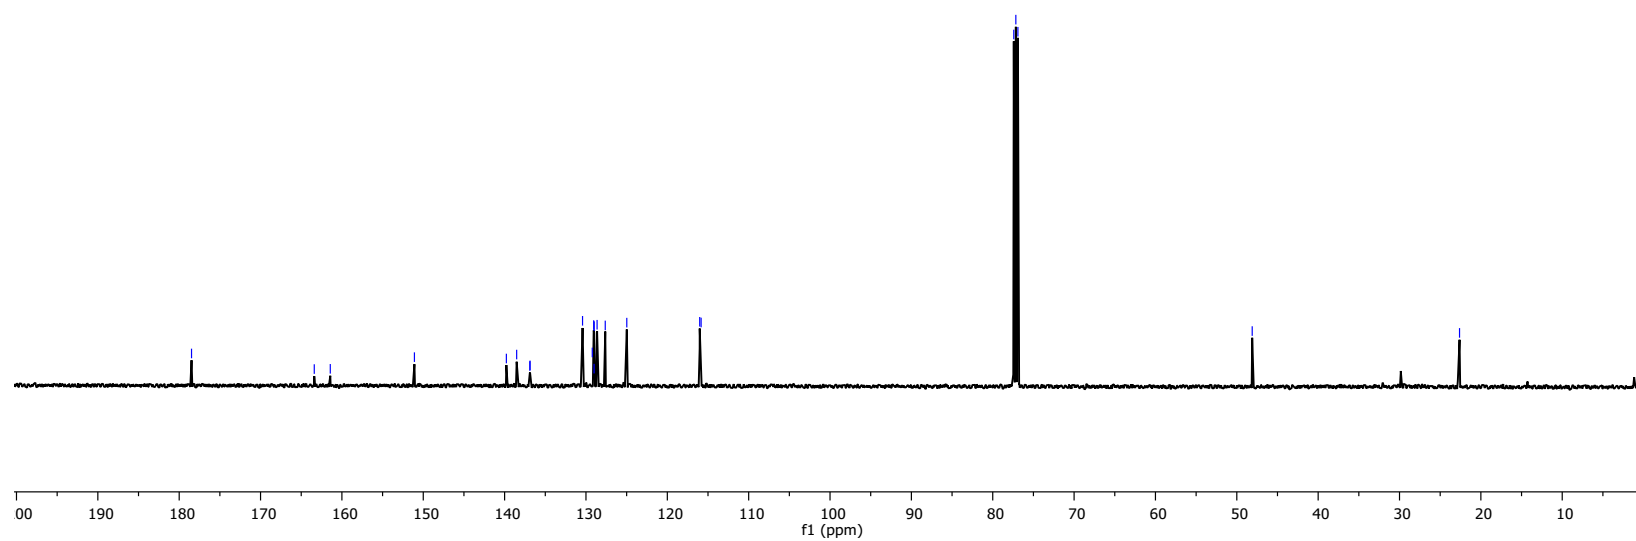

# HRMS of compound 7g

|               |              |             |                    |                 |              |                        |                      |
|---------------|--------------|-------------|--------------------|-----------------|--------------|------------------------|----------------------|
| Sample Name   | SAMPLE       | Position    | P2-A9              | Instrument Name | Instrument 1 | User Name              |                      |
| Inj Vol       | 20           | InjPosition |                    | SampleType      | Sample       | IRM Calibration Status | Success              |
| Data Filename | SM-43-H-21.d | ACQ Method  | ESI ALS 100-1000.m | Comment         |              | Acquired Time          | 2/18/2021 5:17:40 PM |

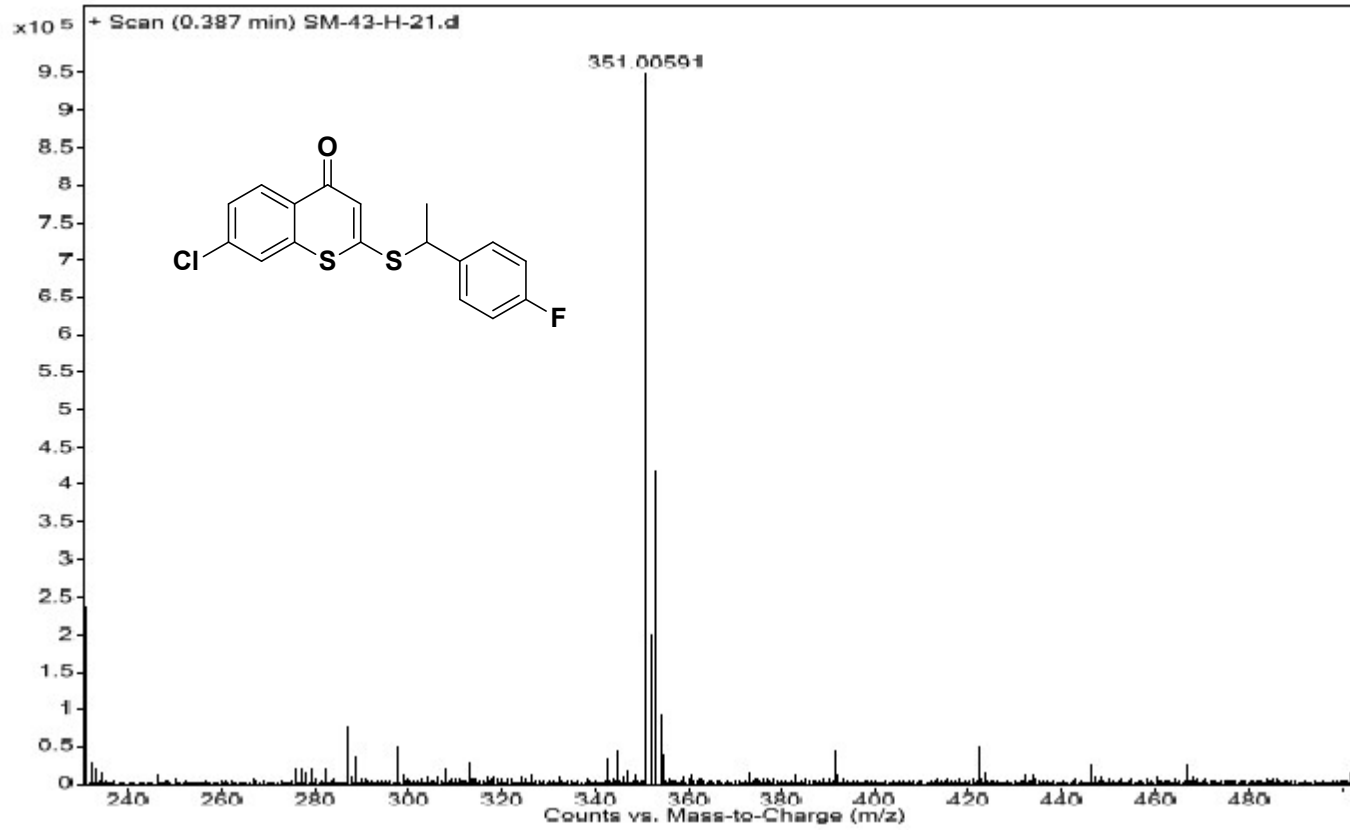





<sup>13</sup>C NMR of compound 7h

SM-43M-21-13C.1.fid

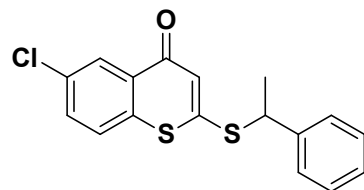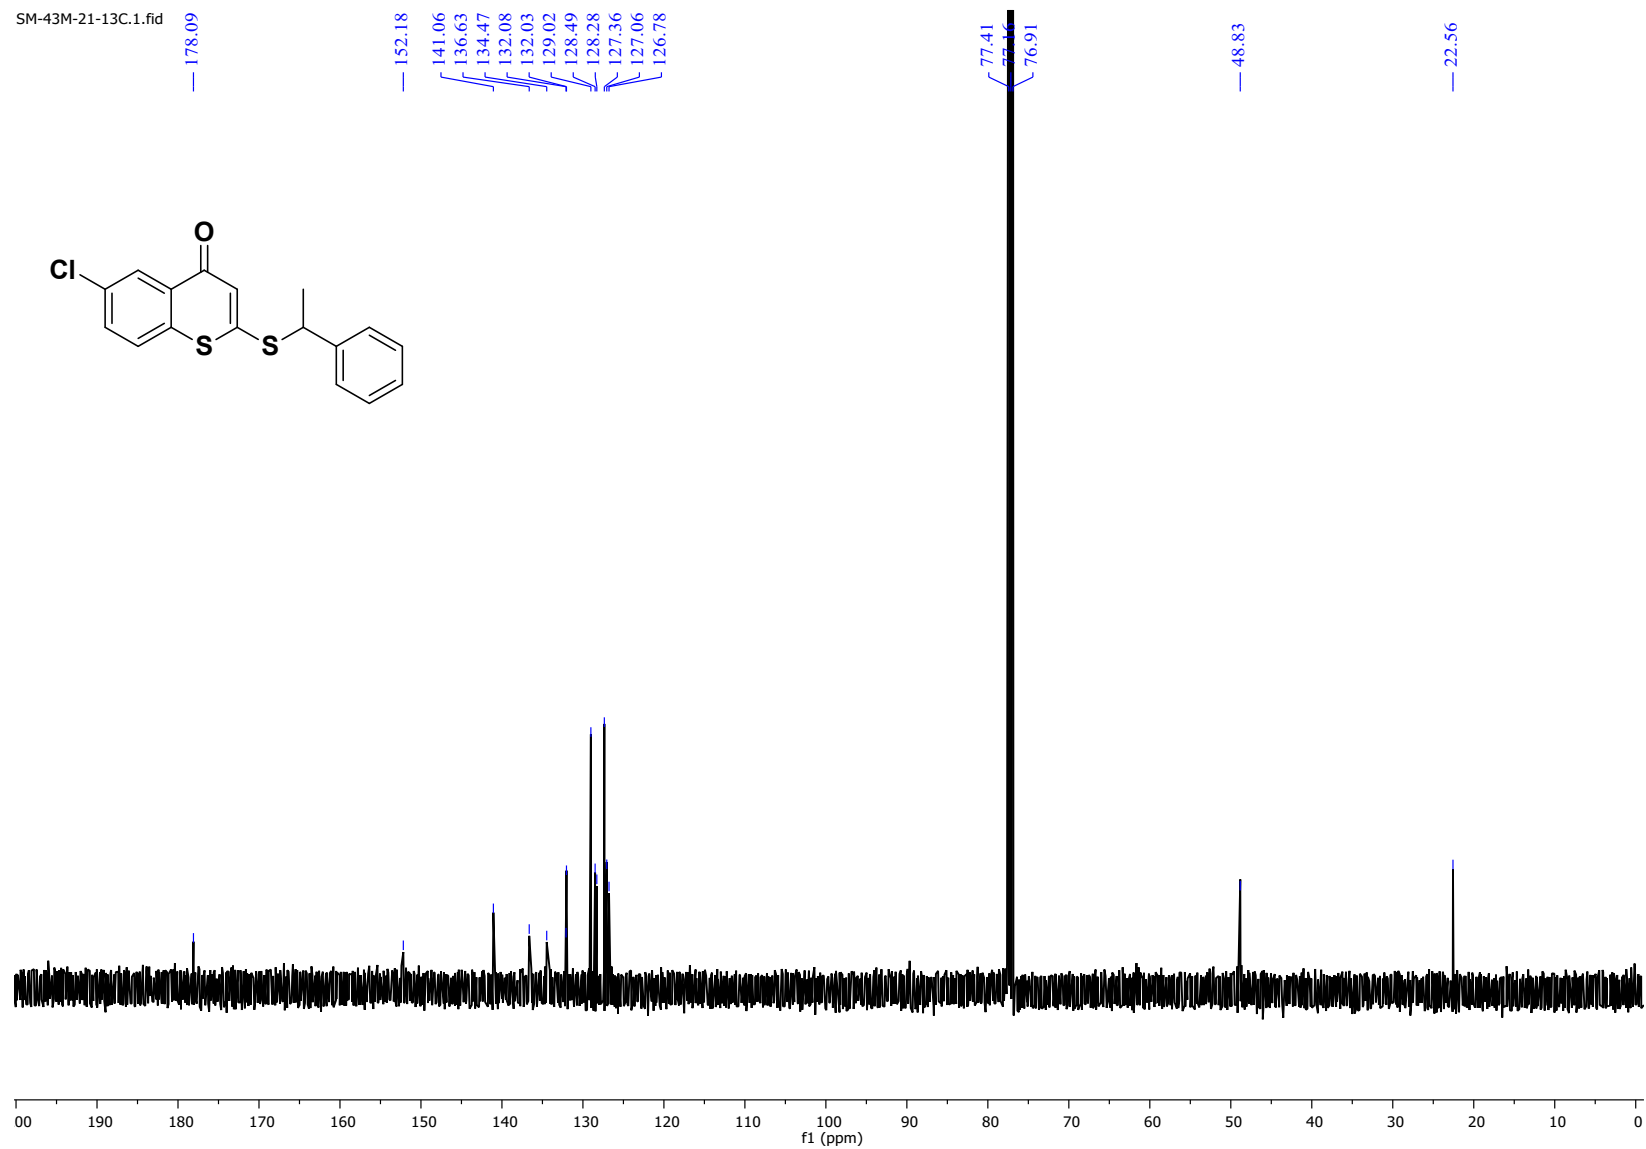

# HRMS of compound 7h

|               |               |             |                    |                 |              |                        |                       |
|---------------|---------------|-------------|--------------------|-----------------|--------------|------------------------|-----------------------|
| Sample Name   | WASH          | Position    | P1-A6              | Instrument Name | Instrument 1 | User Name              |                       |
| Inj Vol       | 20            | InjPosition |                    | SampleType      | Sample       | IRM Calibration Status | Success               |
| Data Filename | SM-43M-21-R.d | ACQ Method  | ESI ALS 100-1000.m | Comment         |              | Acquired Time          | 2/19/2021 12:36:52 PM |

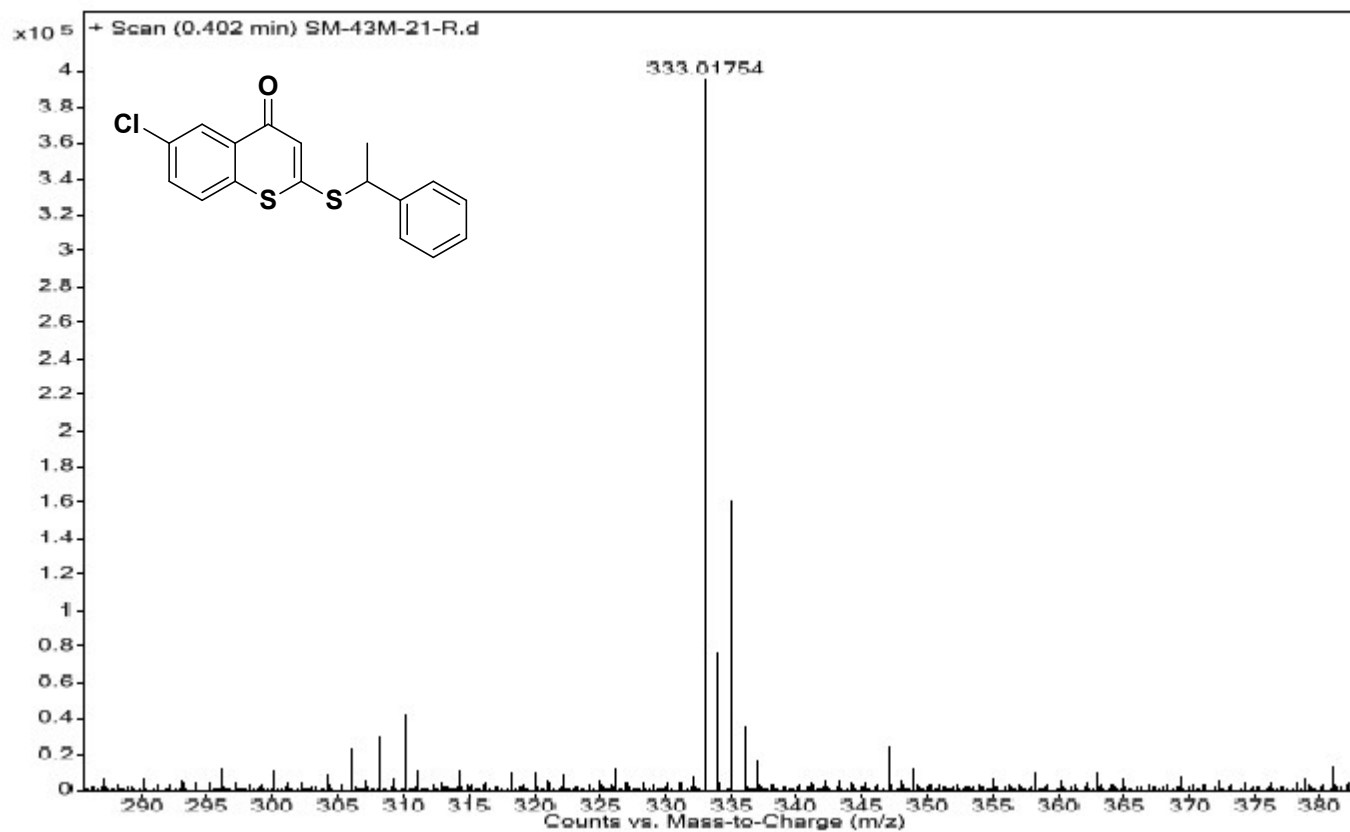

<sup>1</sup>H NMR of compound of 7i

SM-43K-21-1H.5.fid  
SM-43K-21-1H

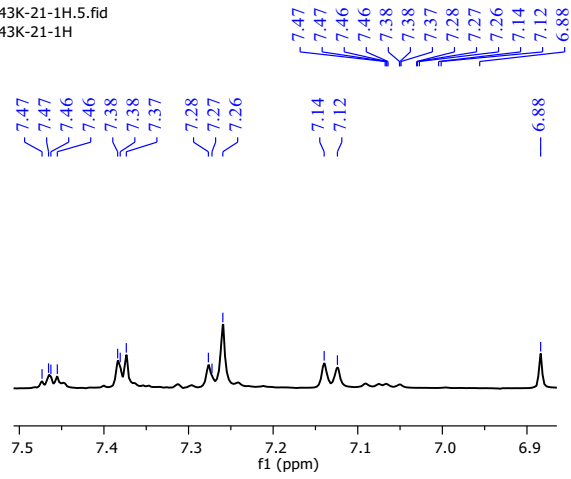

4.66  
4.64  
4.63  
4.61

2.32

1.72  
1.71

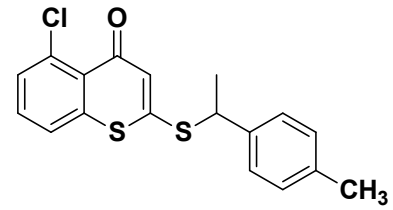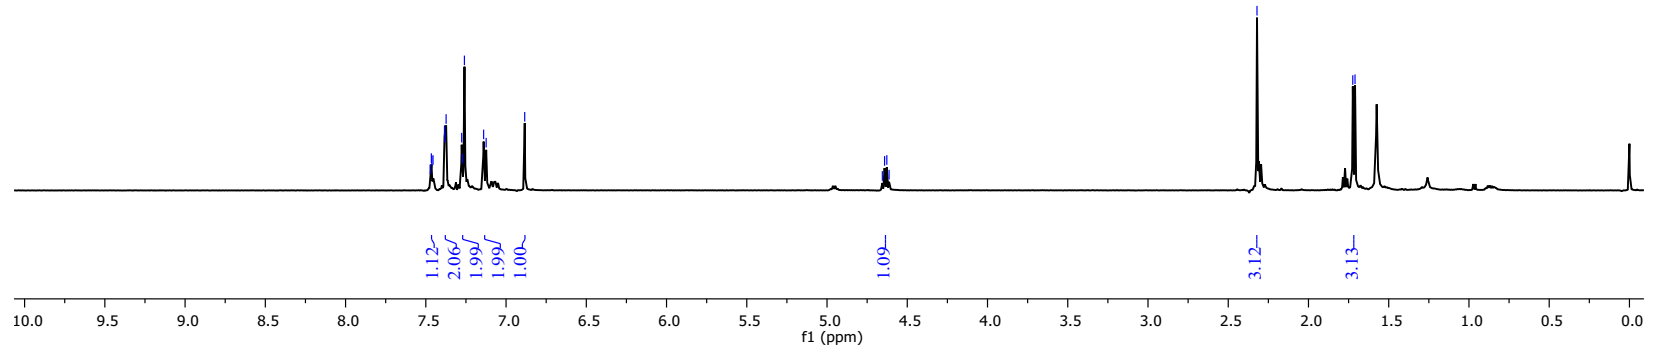

# <sup>13</sup>C NMR of compound 7i

SM-43K-21-13C.7.fid  
SM-43K-21-13C

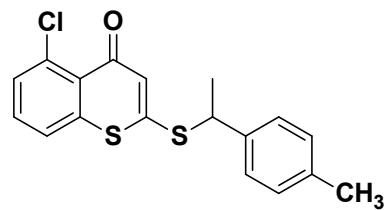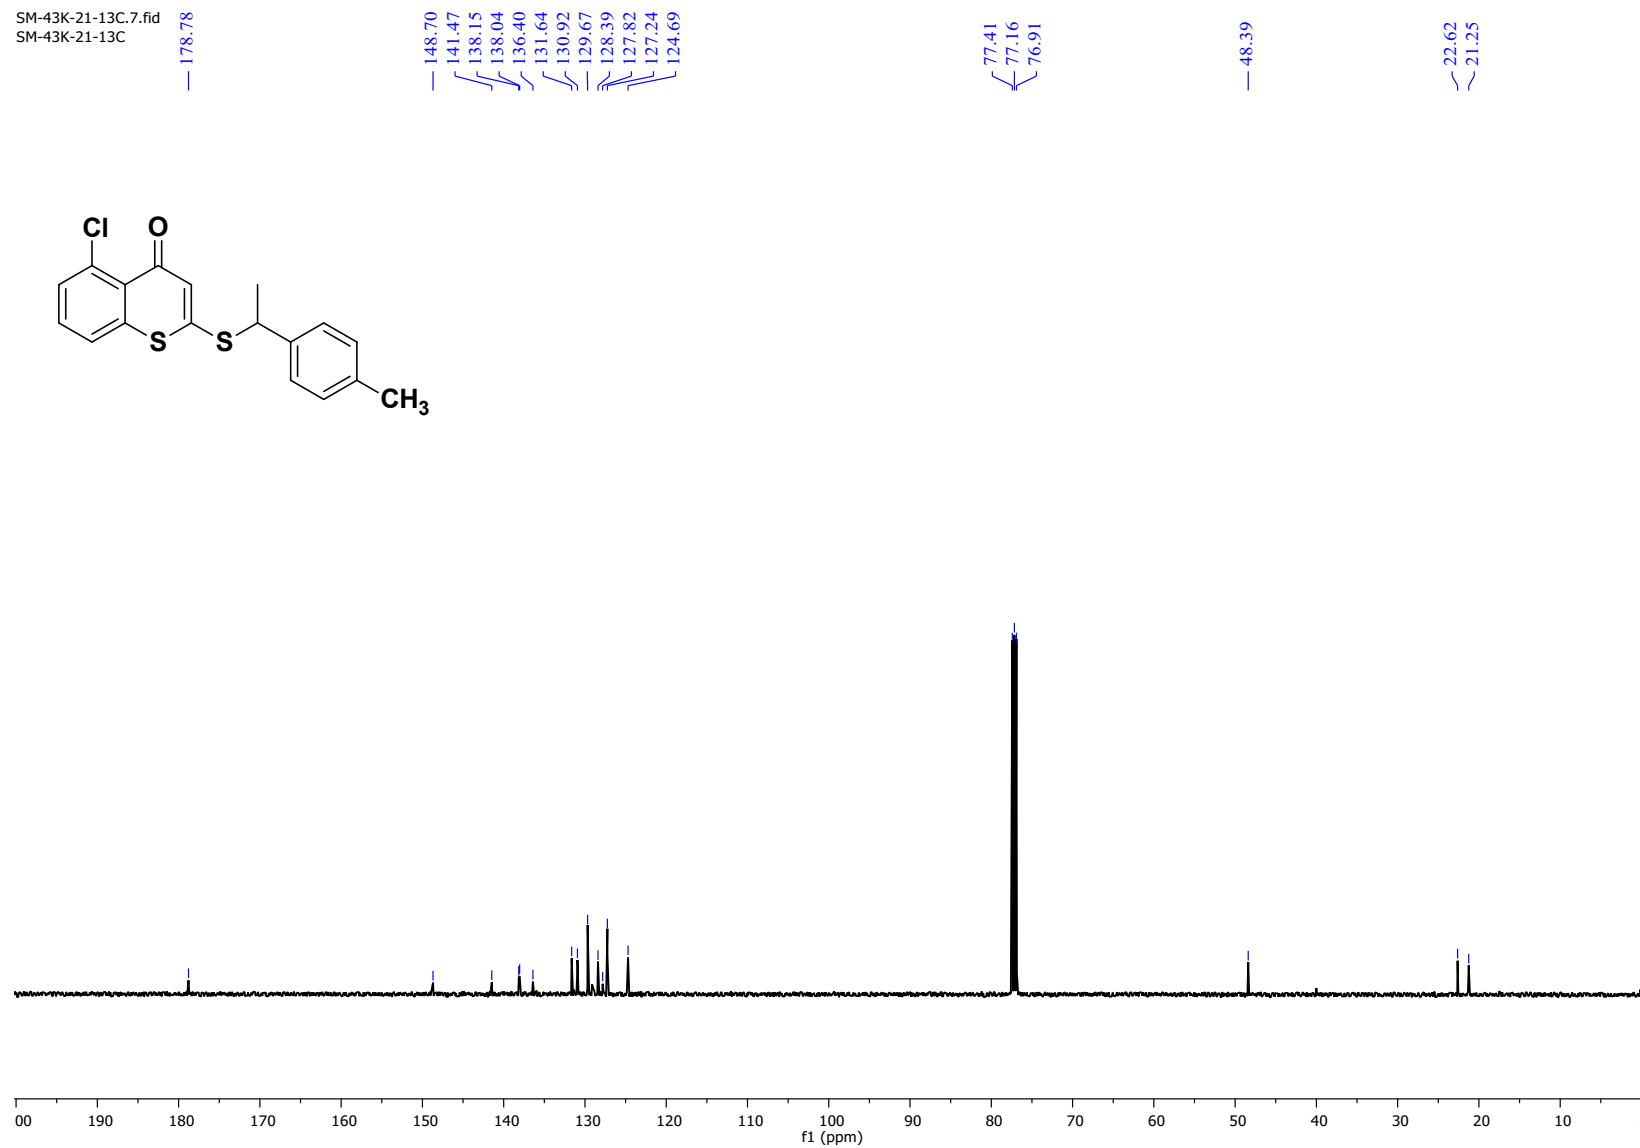

# HRMS of compound 7i

|               |              |             |                   |                 |              |                        |                       |
|---------------|--------------|-------------|-------------------|-----------------|--------------|------------------------|-----------------------|
| Sample Name   | SAMPLE 22    | Position    | P1-B8             | Instrument Name | Instrument 1 | User Name              |                       |
| Inj Vol       | 20           | InjPosition |                   | SampleType      | Sample       | IRM Calibration Status | Success               |
| Data Filename | SM-43KI-21.d | ACQ Method  | ESI ALS 100-500.m | Comment         |              | Acquired Time          | 2/11/2021 12:45:34 PM |

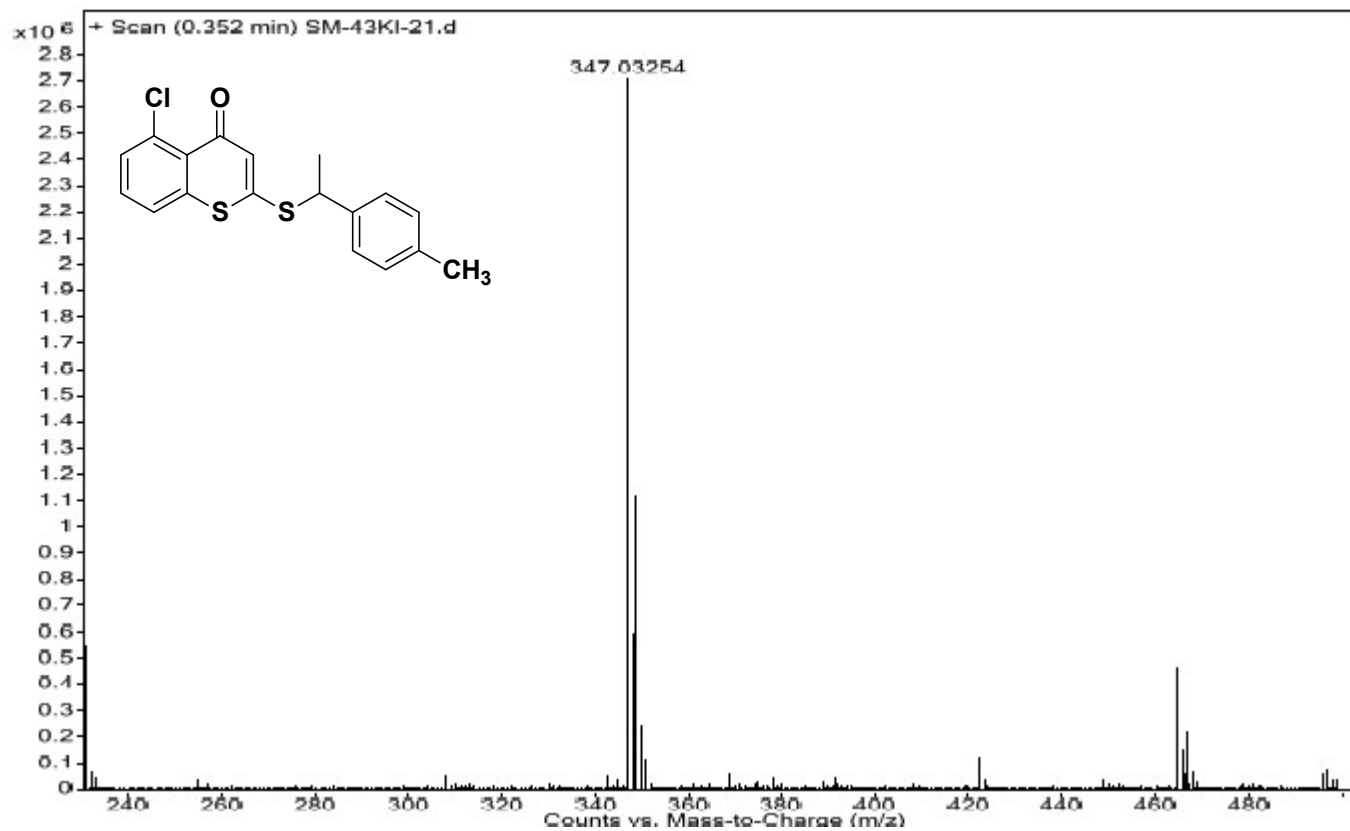

# <sup>1</sup>H NMR of compound 7j

ATK-SM-43J-2I-1H.1.fid  
ATK-SM-43J-2I-1H

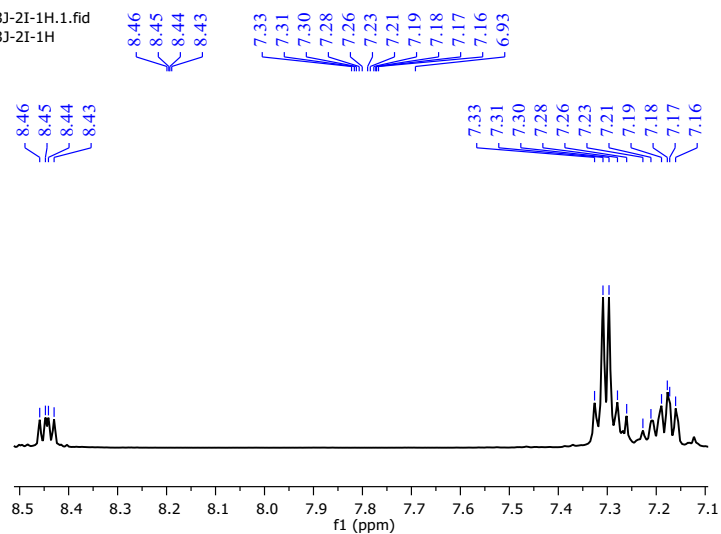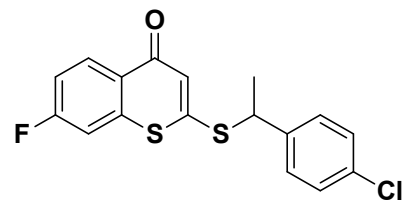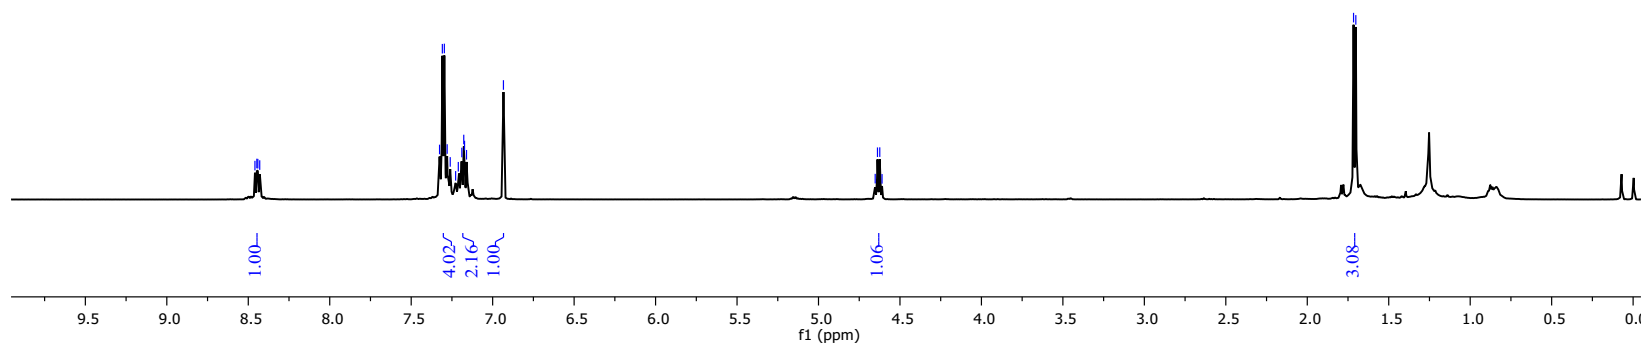

# <sup>13</sup>C NMR of compound 7j

ATK-SM-43J-2I-13C.3.fid  
ATK-SM-43J-2I-1H

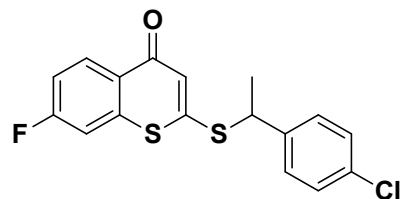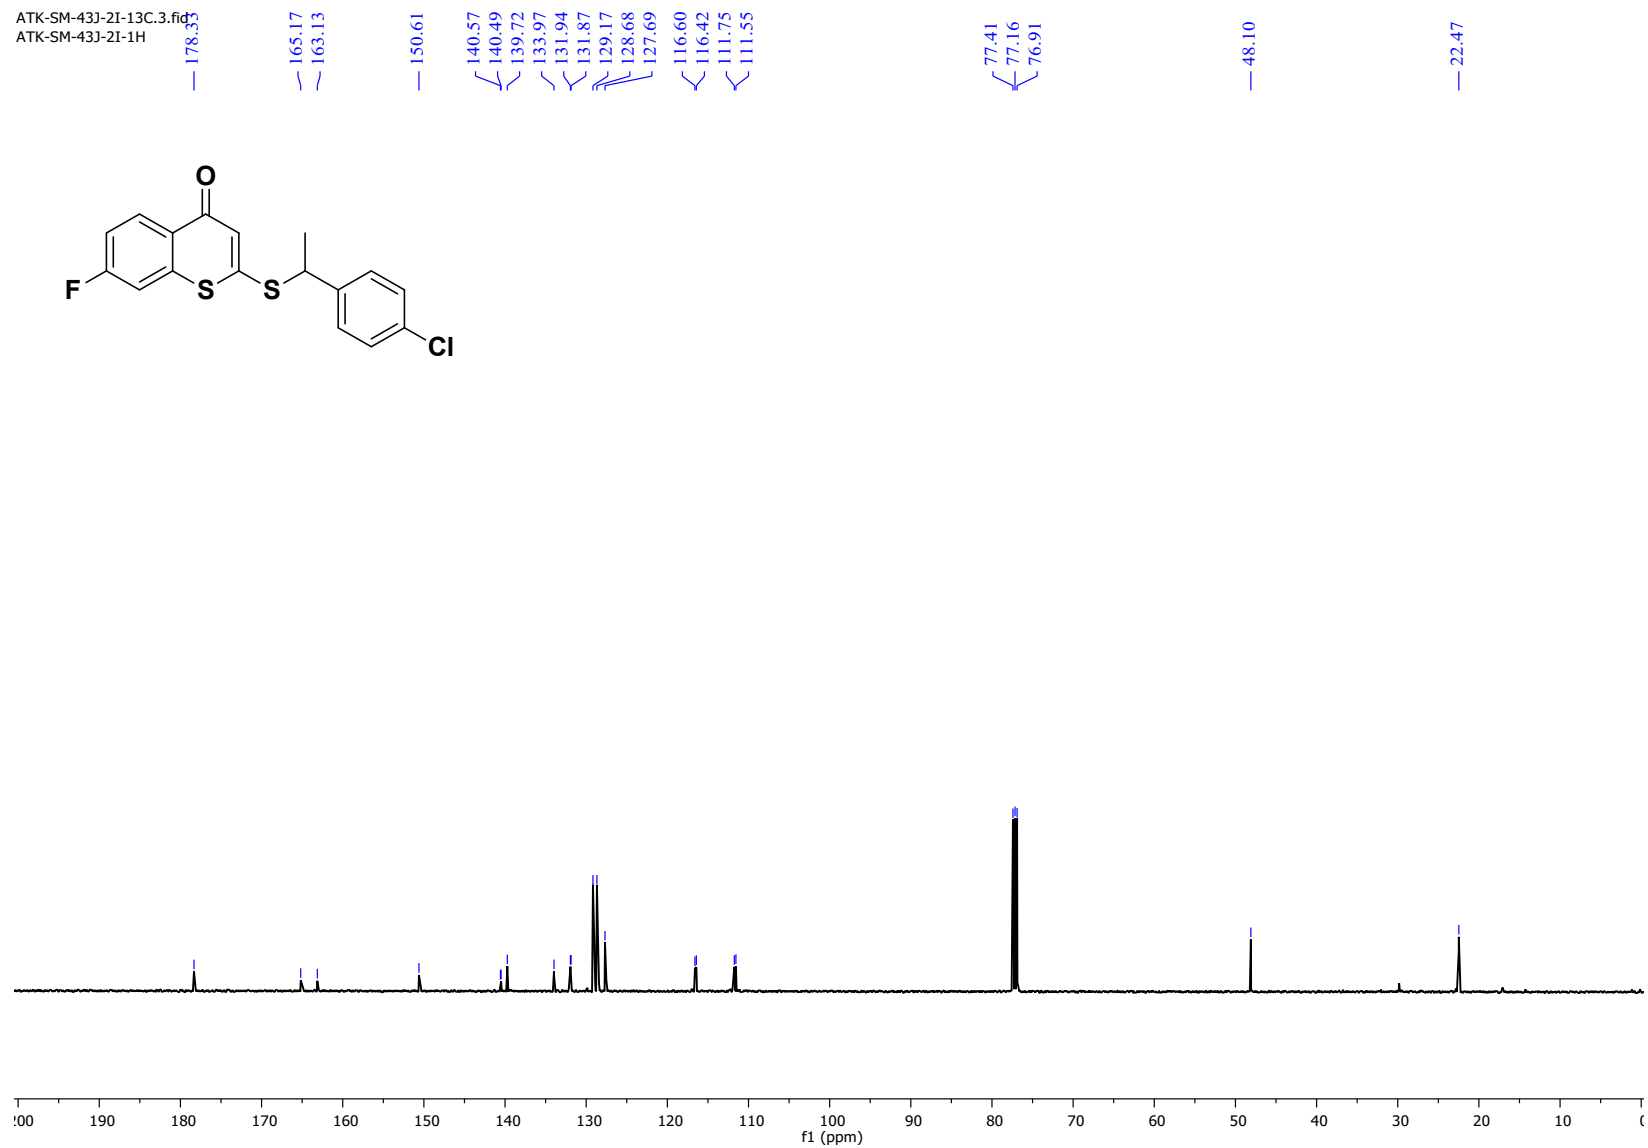



# HRMS of compound 7j

|               |              |             |                    |                 |              |                        |                      |
|---------------|--------------|-------------|--------------------|-----------------|--------------|------------------------|----------------------|
| Sample Name   | SAMPLE       | Position    | P2-A10             | Instrument Name | Instrument 1 | User Name              |                      |
| Inj Vol       | 20           | InjPosition |                    | SampleType      | Sample       | IRM Calibration Status | Success              |
| Data Filename | SM-43-J-21.d | ACQ Method  | ESI ALS 100-1000.m | Comment         |              | Acquired Time          | 2/18/2021 5:28:35 PM |

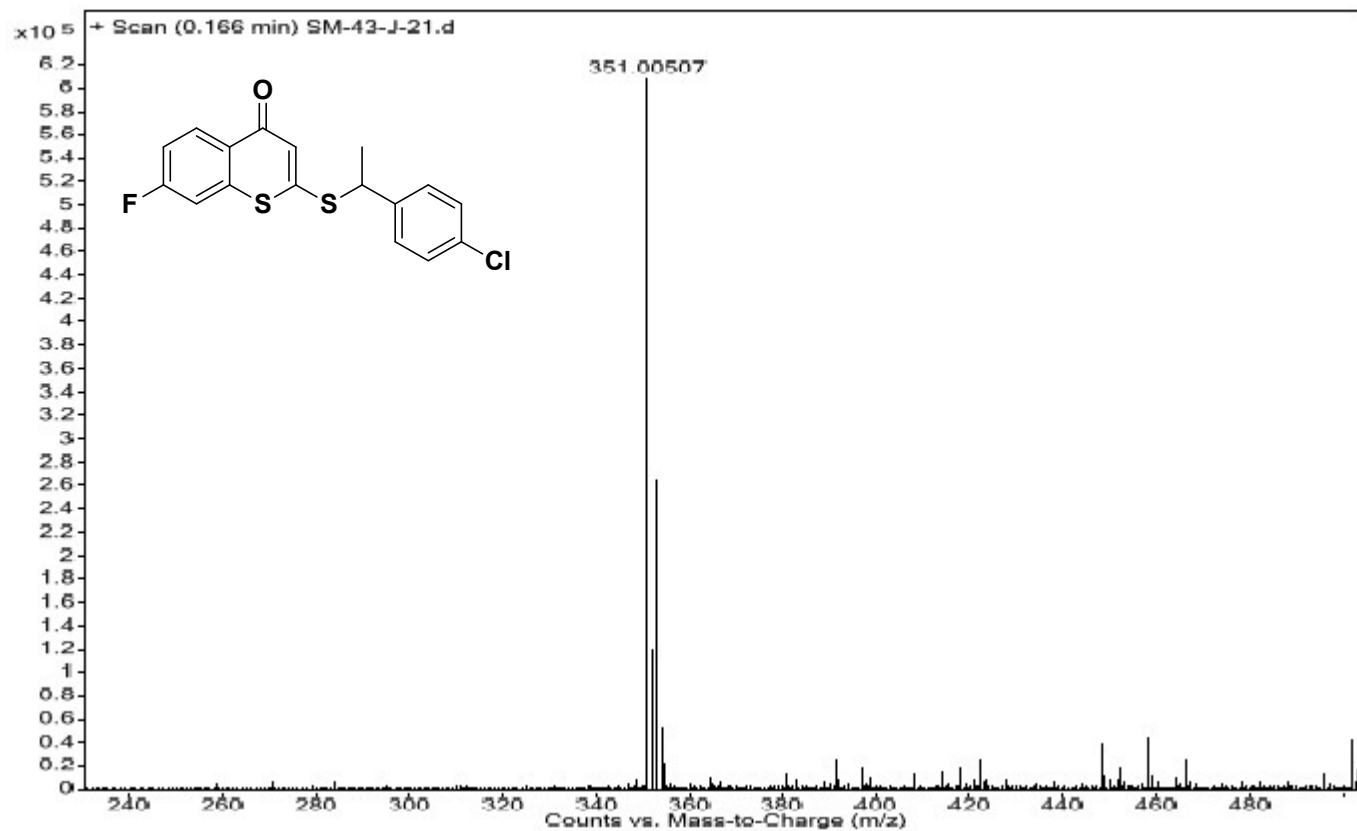

# <sup>1</sup>H NMR of compound 7k

SM-43L-21-1H.1.fid  
SM-43L-21-1H

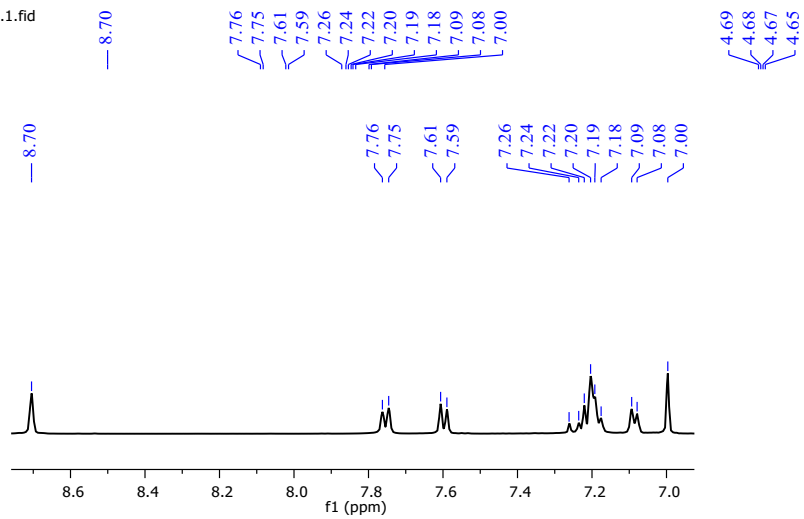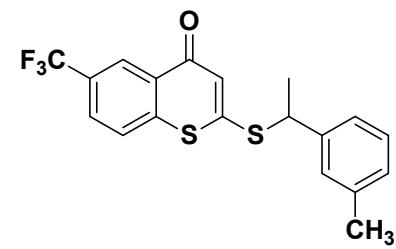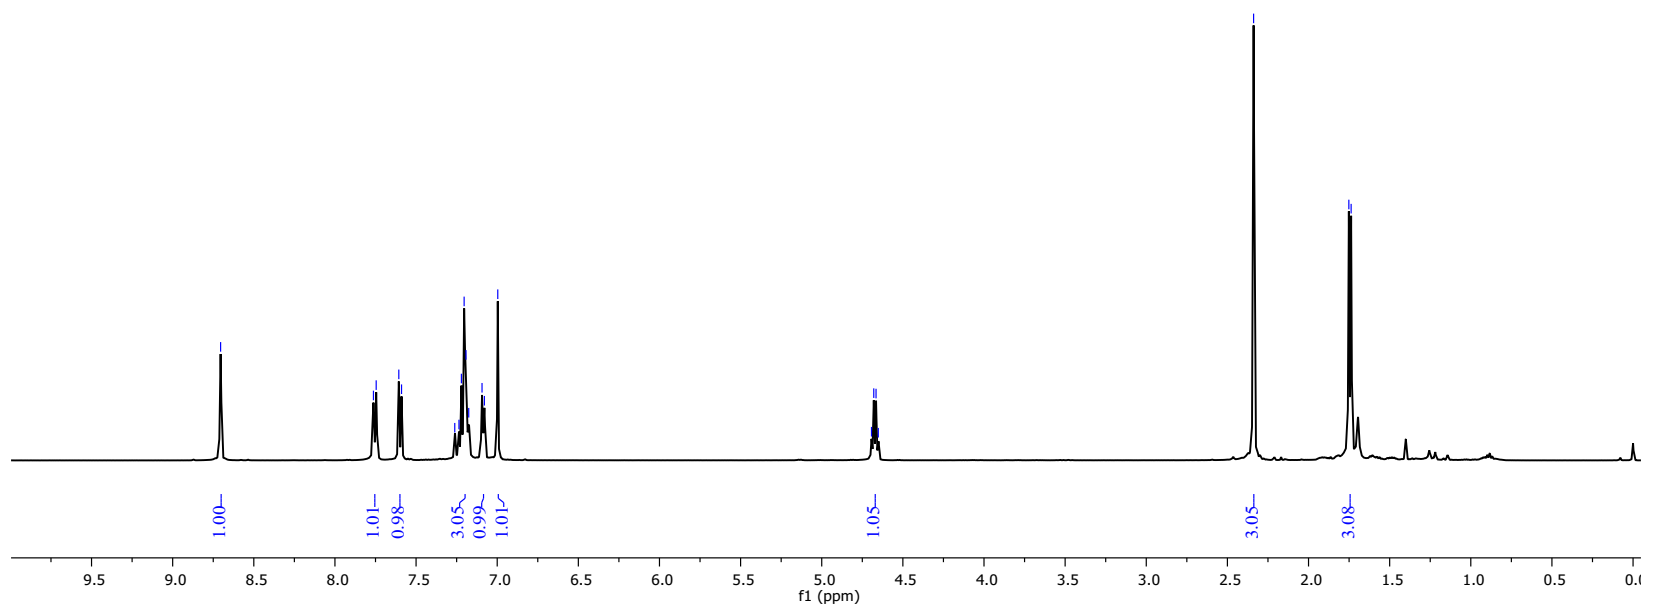

# <sup>13</sup>C NMR of compound 7k

SM-43L-21-13C.1.fid  
SM-43L-21-13C

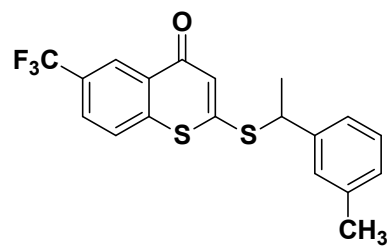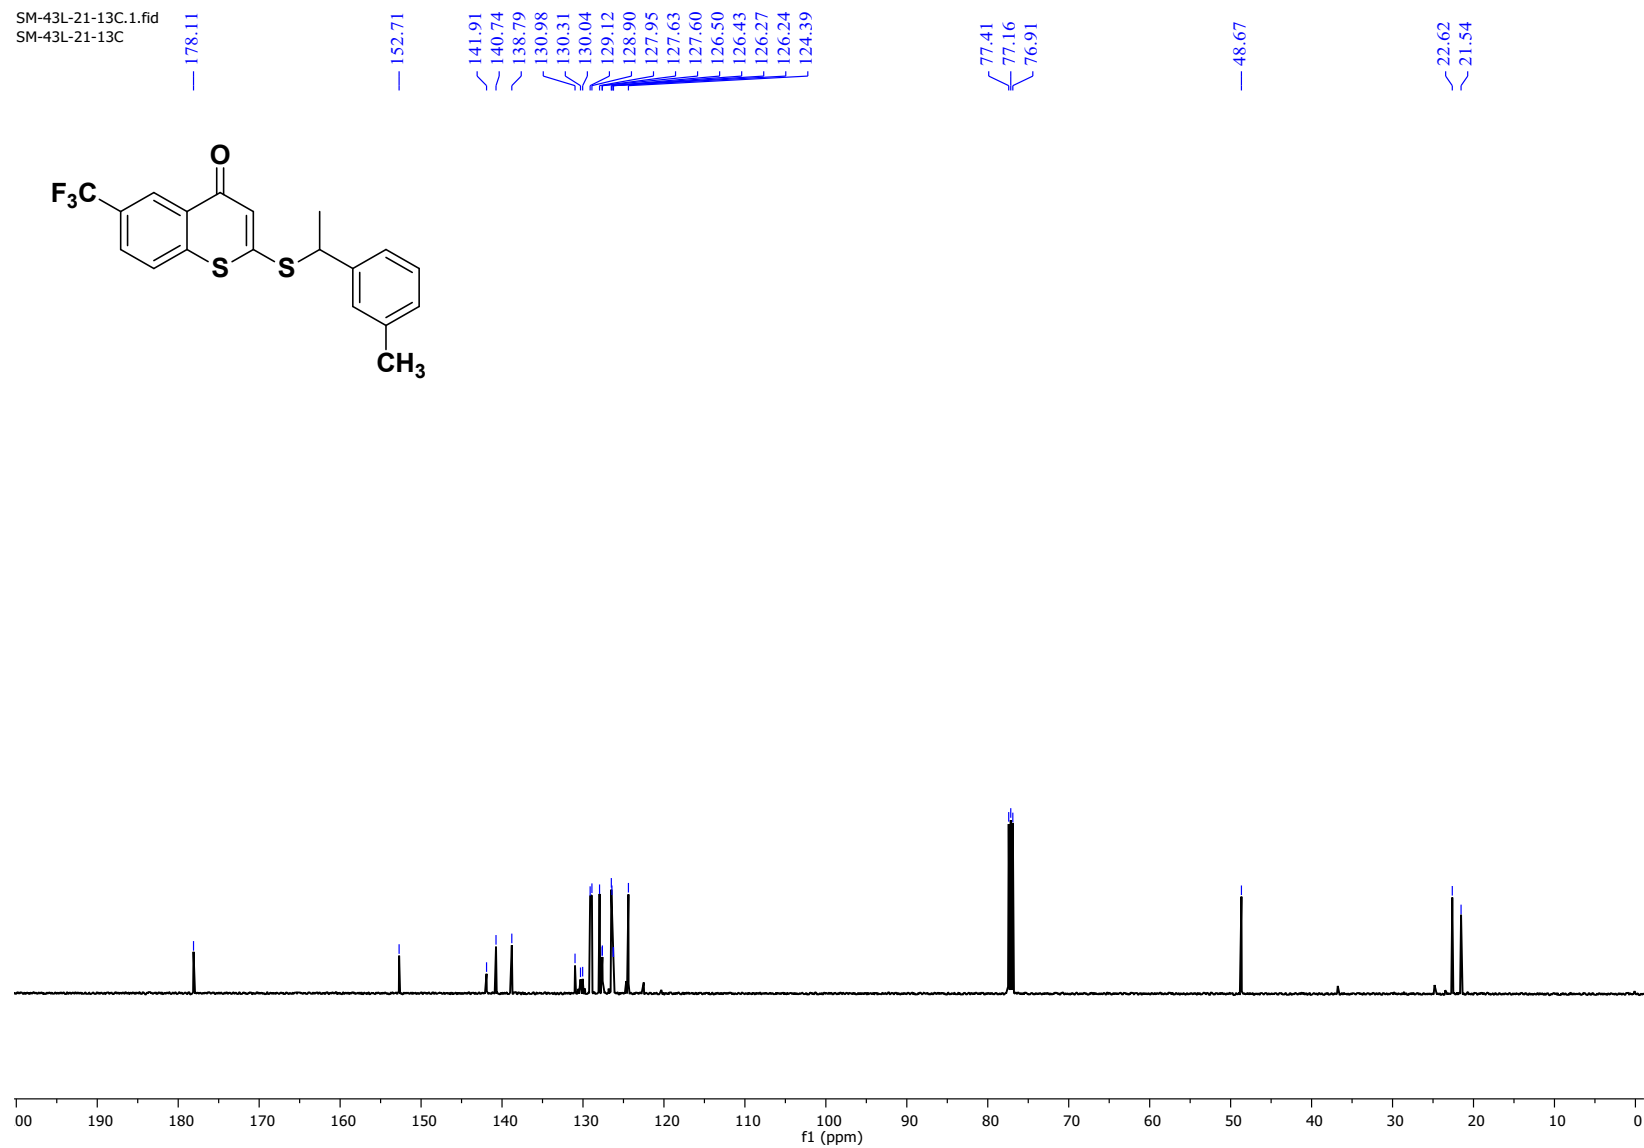

# HRMS of compound 7k

|               |             |             |                    |                 |              |                        |                       |
|---------------|-------------|-------------|--------------------|-----------------|--------------|------------------------|-----------------------|
| Sample Name   | WASH        | Position    | P1-A5              | Instrument Name | Instrument 1 | User Name              |                       |
| Inj Vol       | 20          | InjPosition |                    | SampleType      | Sample       | IRM Calibration Status | Success               |
| Data Filename | SM-43L-21.d | ACQ Method  | ESI ALS 100-1000.m | Comment         |              | Acquired Time          | 2/19/2021 12:35:03 PM |

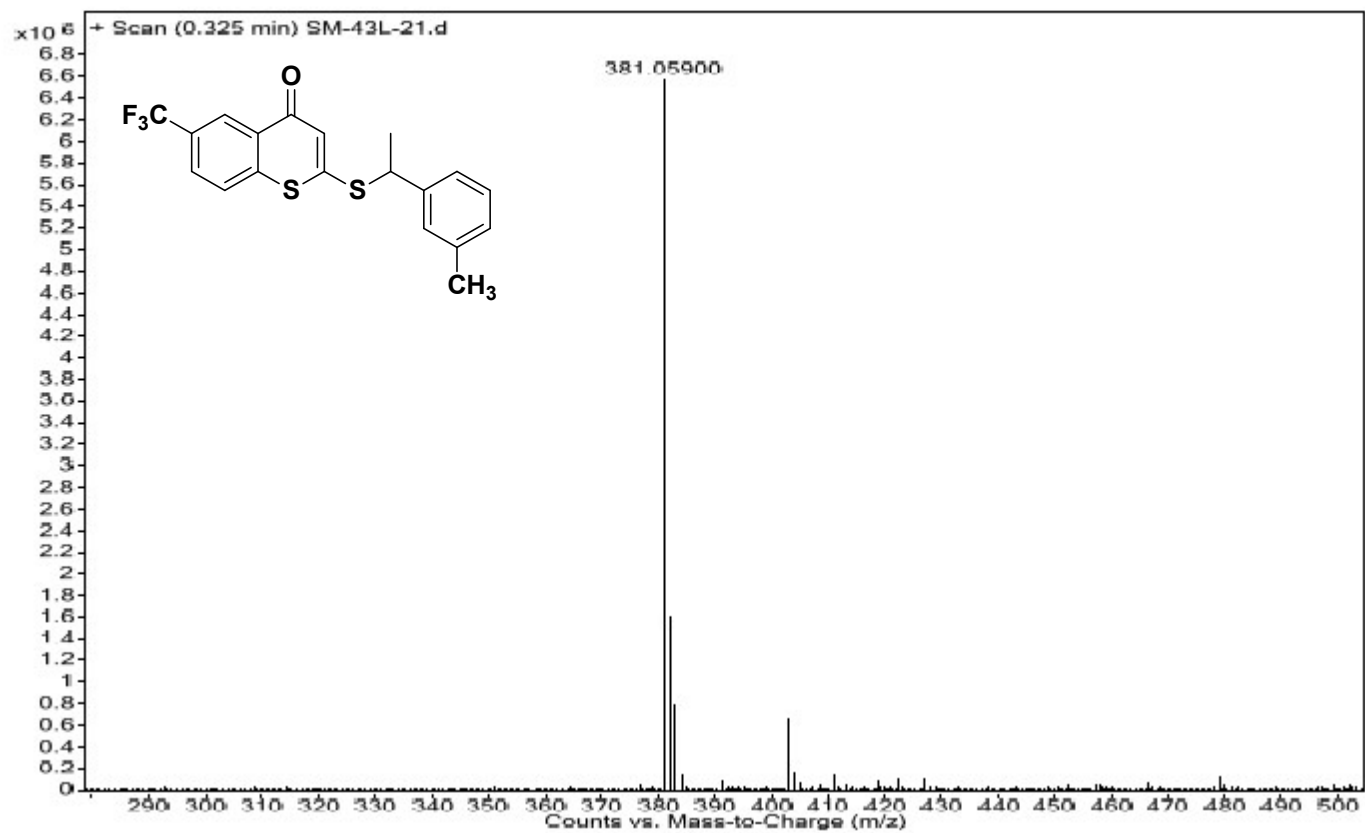

<sup>1</sup>H NMR of 2-((4-vinylbenzyl)thio)-4*H*-thiochromen-4-one

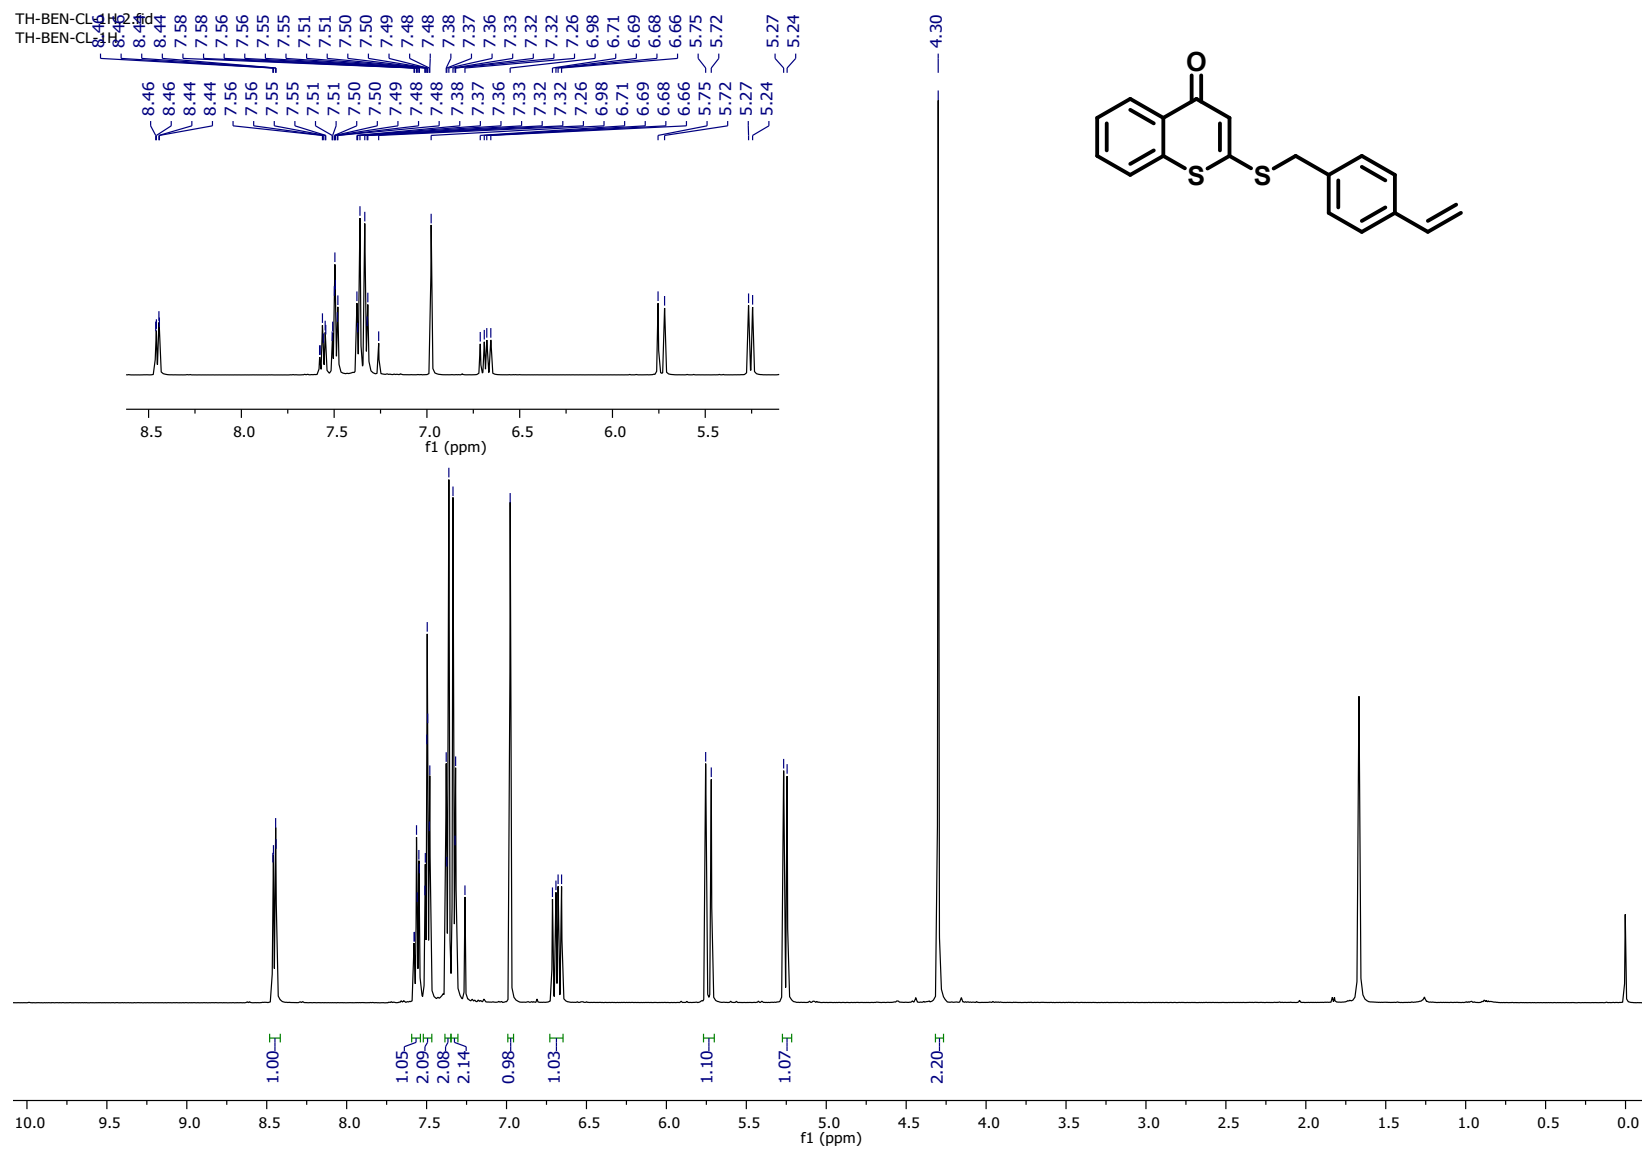

<sup>13</sup>C NMR of 2-((4-vinylbenzyl)thio)-4*H*-thiophen-4-one

TH-BEN-CL-13C.1.fid  
TH-BEN-CL-13C

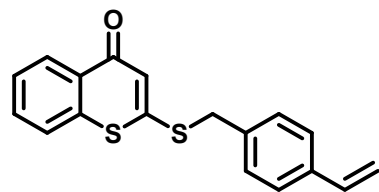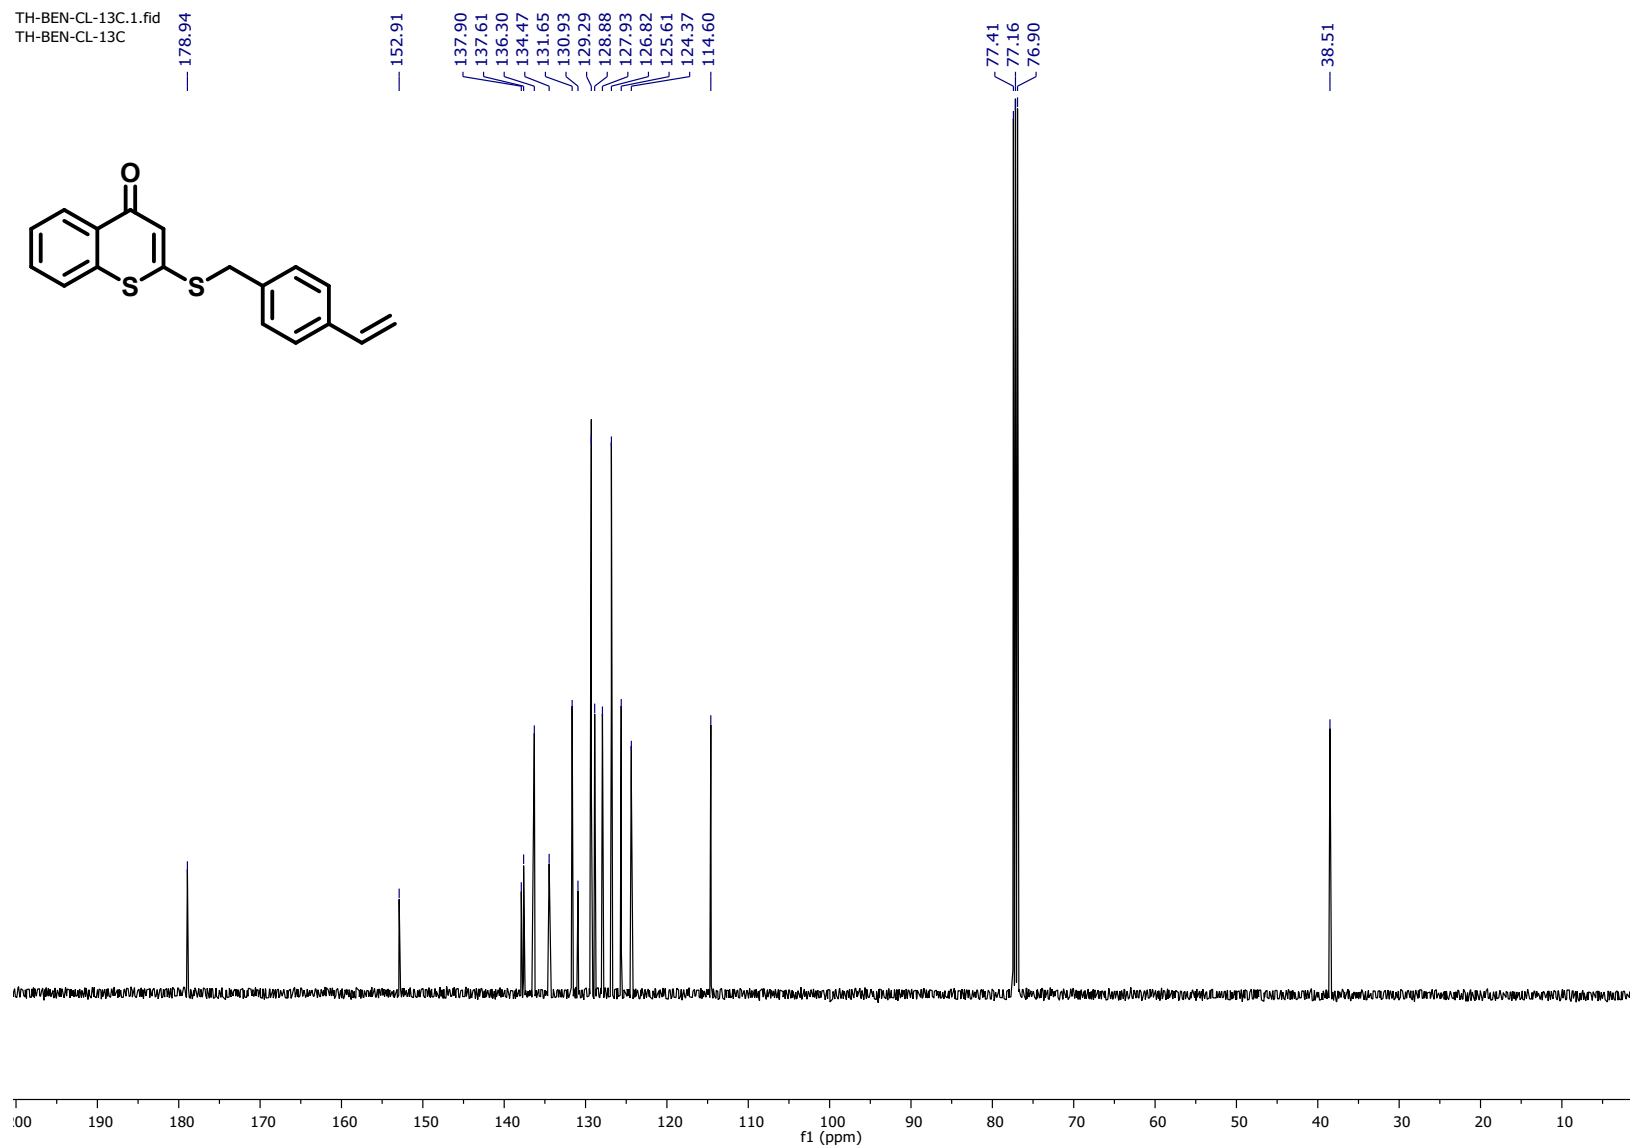

# HRMS of 2-((4-vinylbenzyl)thio)-4*H*-thiochromen-4-one

Sample Name  
User Name  
Sample Type  
ACQ Method

WASH

Sample

ESI ALS 100-1000,m

Position

Inj Vol

IRM Calibration Status

Comment

P2-B11

20

Success

Instrument Name

InjPosition

Data Filename

Acquired Time

Instrument 1

TH-Ber-CL.d

31-Aug-21 07:07:18 PM (UTC+05:30)

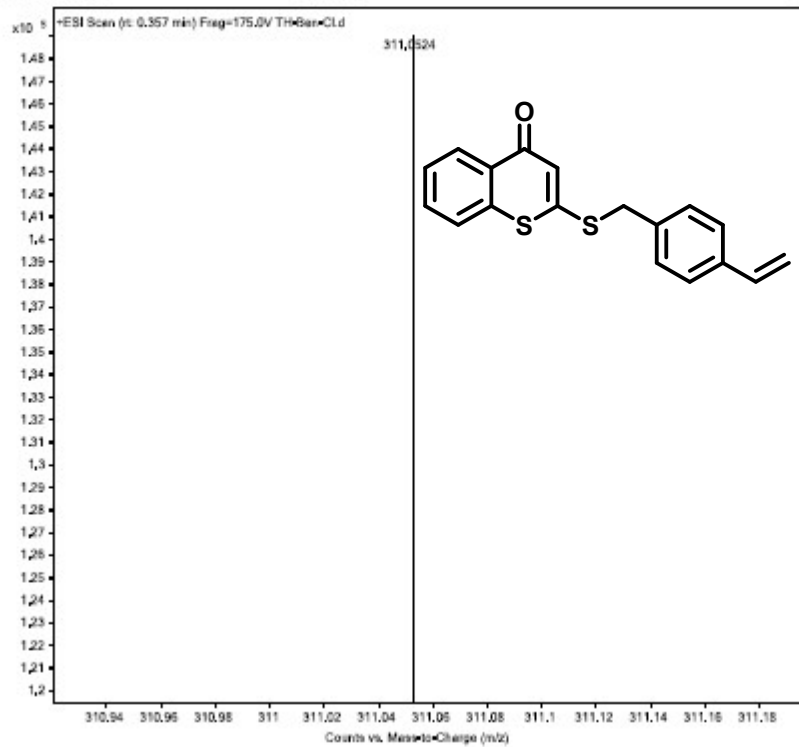

Supplement: d1ob01729b1.pdf [file d1ob01729b1.pdf]
